# Supplementary material
Source: PubMed Central journal article supplement (PMC2532842)
Supplement: NIHMS61170-supplement-si20060518_081.pdf [file NIHMS61170-supplement-si20060518_081.pdf]

## Supporting Information for

### Allenylazide Cycloaddition Chemistry. Synthesis of Annelated Indoles from 2-(Allenyl)phenylazide Substrates.

Ken S. Feldman\* , Malliga R. Iyer and D. Keith Hester II  
*Department of Chemistry, The Pennsylvania State University, University Park,  
Pennsylvania 16802 USA.*

|                                                                                               |                |
|-----------------------------------------------------------------------------------------------|----------------|
| <b>General Experimental</b>                                                                   | <b>S5</b>      |
| <b>1-(2-Azidophenyl)but-2-yn-1-ol</b>                                                         | <b>S5</b>      |
| <b>Representative Procedure 1. Azidophenyl Alkynyl Acetate Synthesis.</b>                     | <b>S6</b>      |
| <b>Representative Procedure 2. Allenylazide Synthesis.</b>                                    | <b>S6/S7</b>   |
| <b>Representative Procedure 3. Allenylazide Synthesis.</b>                                    | <b>S7/S8</b>   |
| <b>Representative Procedure 4. Cyclization.</b>                                               | <b>S8</b>      |
| <b>Representative Procedure 5. Azidophenyl Alkynyl Alcohol Synthesis.</b>                     | <b>S9</b>      |
| <b>Representitive Procedure 6. Thermolysis of Crude<br/>Phenyl-substituted Allenylazides.</b> | <b>S9/S10</b>  |
| <b>1-<i>t</i>-Butyldimethylsilyloxy-4-acetoxy-4-(2-azidophenyl)but-2-yne (9b)</b>             | <b>S10</b>     |
| <b>1-<i>t</i>-Butyldimethylsilyloxy-5-(2-azidophenyl)pent-3-yn-5-ol</b>                       | <b>S10/S11</b> |
| <b>1-<i>t</i>-Butyldimethylsilyloxy-5-acetoxy-5-(2-azidophenyl)pent-3-yne (9c)</b>            | <b>S11</b>     |
| <b>1-(2-Azidophenyl)4,4-dimethylpent-2-yn-1-ol</b>                                            | <b>S11/S12</b> |
| <b>1-Acetoxy-1(2-azidophenyl)4,4-dimethylpent-2-yne (9d)</b>                                  | <b>S12</b>     |
| <b>1-(2-Azidophenyl)5-phenylpent-4en-2-yn-ol</b>                                              | <b>S12/S13</b> |
| <b>1-Acetoxy-1(2-azidophenyl) 5-phenylpent-4en-2-yne (9g)</b>                                 | <b>S13</b>     |
| <b>1-(2-Azidophenyl)3-cyclohex-1-enylprop-2-yn-1-ol</b>                                       | <b>S13/S14</b> |
| <b>1-Acetoxy-1(2-azidophenyl) 3-cyclohex-1-enylprop-2-yne (9h)</b>                            | <b>S14</b>     |
| <b>1-(2-Azidophenyl)3-cyclopent-1-enylprop-2-yn-1-ol</b>                                      | <b>S14/S15</b> |
| <b>1-Acetoxy-1(2-azidophenyl) 3-cyclopent-1-enylprop-2-yne (9i)</b>                           | <b>S15</b>     |

|                                                                                                           |         |
|-----------------------------------------------------------------------------------------------------------|---------|
| 1- <i>t</i> -Butyldimethylsilyloxy-2-vinyl-4-(2-azidophenyl)but-2,3-diene (6b)                            | S15/S16 |
| 1- <i>t</i> -Butyldimethylsilyloxy-3-vinyl-5-(2-azidophenyl)but-3,4-diene (6c)                            | S16     |
| 1-(2-Azidophenyl)3- <i>t</i> -butylpent-1,2,4-triene (6d)                                                 | S16/S17 |
| 1-(2-Azidophenyl)3-methyl-5phenylpent-1,2,4-triene (6e)                                                   | S17     |
| 1-(2-Azidophenyl)3-methyl-4-phenylpent-1,2,4-triene (6f)                                                  | S17/S18 |
| 1-(2-Azidophenyl)3-methyl-4-phenylpent-1,2,4-triene (6g)                                                  | S18     |
| 1-(2-Azidophenyl)3-cyclopent-1-enylbut-1,2-diene (6i)                                                     | S18/S19 |
| 3-( <i>t</i> -Butyldimethylsilyloxymethyl)-1,4-dihydrocyclopenta[b]indole (7b)                            | S19     |
| 1-( <i>t</i> -Butyldimethylsilyloxymethyl)-9H-pyrrolo[1,2-a]indole (11b)                                  | S19/S20 |
| 3-( <i>t</i> -Butyldimethylsilyloxyethyl)-1,4-dihydrocyclopenta[b]indole (7c)                             | S20     |
| 1-( <i>t</i> -Butyldimethylsilyloxyethyl)-9H-pyrrolo[1,2-a]indole (11c)                                   | S20     |
| 3- <i>t</i> -Butyl-1,4-dihydrocyclopenta[b]indole (7d)                                                    | S20/S21 |
| 1- <i>t</i> -Butyl-9H-pyrrolo[1,2-a]indole (11d)                                                          | S21     |
| 3-Methyl-2-phenyl-1,4-dihydrocyclopenta[b]indole (7e)                                                     | S21/S22 |
| 1-Methyl-2-phenyl-9H-pyrrolo[1,2-a]indole (11e)                                                           | S22     |
| 2,3-Dimethyl -1,4-dihydrocyclopenta[b]indole (7f)                                                         | S22     |
| 1,1-Dimethyl-9H-pyrrolo[1,2-a]indole (11f)                                                                | S22/S23 |
| 1-Methyl-3-phenyl-3H-pyrrolo[1,2-a]indole (10g)                                                           | S23     |
| 1-Methyl-3-phenyl-2,3-dihydro-1H-pyrrolo[1,2-a]indole (12g)                                               | S23/S24 |
| 6-Methyl -5,7,8,9-hexahydroindeno[2,1-b]indole (7h)                                                       | S24     |
| 11-Methyl-2,3,4,10-tetrahydro-1H-indolo[1,2-a]indole (11h)                                                | S24/S25 |
| Pyrrolo-indole (10i)                                                                                      | S25     |
| 2-[1-(4-Methoxy-phenyl)-vinyl]-1H-indole (14k)                                                            | S25/S26 |
| 2-[1-(3-Methoxy-phenyl)-vinyl]-1H-indole (14l)                                                            | S26/S27 |
| 2-[1-(3-Fluoro-phenyl)-vinyl]-1H-indole (14m)                                                             | S27     |
| <sup>1</sup> H NMR, <sup>13</sup> C NMR 1-(2-Azidophenyl)but-2-yn-1-ol                                    | S28/S29 |
| <sup>1</sup> H NMR, <sup>13</sup> C NMR 9a                                                                | S30/S31 |
| <sup>1</sup> H NMR, <sup>13</sup> C NMR 1- <i>t</i> -Butyldimethylsilyloxy-4-(2-azidophenyl)but-2-yn-4ol  | S32/S33 |
| <sup>1</sup> H NMR, <sup>13</sup> C NMR 9b                                                                | S34/S35 |
| <sup>1</sup> H NMR, <sup>13</sup> C NMR 1- <i>t</i> -Butyldimethylsilyloxy-5-(2-azidophenyl)pent-3-yn-5ol | S36/S37 |
| <sup>1</sup> H NMR, <sup>13</sup> C NMR 9c                                                                | S38/S39 |

|                                                                                                |                  |
|------------------------------------------------------------------------------------------------|------------------|
| <b><sup>1</sup>H NMR, <sup>13</sup>C NMR 1-(2-Azidophenyl)4,4-dimethylpent-2-yn-1-ol</b>       | <b>S40/S41</b>   |
| <b><sup>1</sup>H NMR, <sup>13</sup>C NMR 9d</b>                                                | <b>S42/S43</b>   |
| <b><sup>1</sup>H NMR, <sup>13</sup>C NMR 1-(2-Azidophenyl)5-phenylpent-4en-2-yn-ol</b>         | <b>S44/S45</b>   |
| <b><sup>1</sup>H NMR, <sup>13</sup>C NMR 9g</b>                                                | <b>S46/S47</b>   |
| <b><sup>1</sup>H NMR, <sup>13</sup>C NMR 1-(2-Azidophenyl)3-cyclohex-1-enylprop-2-yn-1-ol</b>  | <b>S48/S49</b>   |
| <b><sup>1</sup>H NMR, <sup>13</sup>C NMR 9h</b>                                                | <b>S50/S51</b>   |
| <b><sup>1</sup>H NMR, <sup>13</sup>C NMR 1-(2-Azidophenyl)3-cyclopent-1-enylprop-2-yn-1-ol</b> | <b>S52/S53</b>   |
| <b><sup>1</sup>H NMR, <sup>13</sup>C NMR 9i</b>                                                | <b>S54/S55</b>   |
| <b><sup>1</sup>H NMR, <sup>13</sup>C NMR 6a</b>                                                | <b>S56/S57</b>   |
| <b><sup>1</sup>H NMR, <sup>13</sup>C NMR 6b</b>                                                | <b>S58/S59</b>   |
| <b><sup>1</sup>H NMR, <sup>13</sup>C NMR 6c</b>                                                | <b>S60/S61</b>   |
| <b><sup>1</sup>H NMR, <sup>13</sup>C NMR 6d</b>                                                | <b>S62/S63</b>   |
| <b><sup>1</sup>H NMR, <sup>13</sup>C NMR 6e</b>                                                | <b>S64/S65</b>   |
| <b><sup>1</sup>H NMR, <sup>13</sup>C NMR 6f</b>                                                | <b>S66/S67</b>   |
| <b><sup>1</sup>H NMR, <sup>13</sup>C NMR 6g</b>                                                | <b>S68/S69</b>   |
| <b><sup>1</sup>H NMR, <sup>13</sup>C NMR 6h</b>                                                | <b>S70/S71</b>   |
| <b><sup>1</sup>H NMR, <sup>13</sup>C NMR 6i</b>                                                | <b>S72/S73</b>   |
| <b><sup>1</sup>H NMR, <sup>13</sup>C NMR 7a</b>                                                | <b>S74/S75</b>   |
| <b><sup>1</sup>H NMR, <sup>13</sup>C NMR 11a</b>                                               | <b>S76/S77</b>   |
| <b><sup>1</sup>H NMR, <sup>13</sup>C NMR 7b</b>                                                | <b>S78/S79</b>   |
| <b><sup>1</sup>H NMR, <sup>13</sup>C NMR 11b</b>                                               | <b>S80/S81</b>   |
| <b><sup>1</sup>H NMR, <sup>13</sup>C NMR 7c</b>                                                | <b>S82/S83</b>   |
| <b><sup>1</sup>H NMR, <sup>13</sup>C NMR 11c</b>                                               | <b>S84/S85</b>   |
| <b><sup>1</sup>H NMR, <sup>13</sup>C NMR 7d</b>                                                | <b>S86/S87</b>   |
| <b><sup>1</sup>H NMR, <sup>13</sup>C NMR 11d</b>                                               | <b>S88/S89</b>   |
| <b><sup>1</sup>H NMR, <sup>13</sup>C NMR 7e</b>                                                | <b>S90/S91</b>   |
| <b><sup>1</sup>H NMR, <sup>13</sup>C NMR 11e</b>                                               | <b>S92/S93</b>   |
| <b><sup>1</sup>H NMR, <sup>13</sup>C NMR 7f</b>                                                | <b>S94/S95</b>   |
| <b><sup>1</sup>H NMR, <sup>13</sup>C NMR 11f</b>                                               | <b>S96/S97</b>   |
| <b><sup>1</sup>H NMR, <sup>13</sup>C NMR 10g</b>                                               | <b>S98/S99</b>   |
| <b><sup>1</sup>H NMR, <sup>13</sup>C NMR 12g</b>                                               | <b>S100/S101</b> |

|                                                  |                  |
|--------------------------------------------------|------------------|
| <b><sup>1</sup>H NMR, <sup>13</sup>C NMR 7h</b>  | <b>S102/S103</b> |
| <b><sup>1</sup>H NMR, <sup>13</sup>C NMR 11h</b> | <b>S104/S105</b> |
| <b><sup>1</sup>H NMR, <sup>13</sup>C NMR 10i</b> | <b>S106/S107</b> |
| <b><sup>1</sup>H NMR, <sup>13</sup>C NMR 14j</b> | <b>S108/S109</b> |
| <b><sup>1</sup>H NMR, <sup>13</sup>C NMR 14k</b> | <b>S110/S111</b> |
| <b><sup>1</sup>H NMR, <sup>13</sup>C NMR 14l</b> | <b>S112/S113</b> |
| <b><sup>1</sup>H NMR, <sup>13</sup>C NMR 14m</b> | <b>S114/S115</b> |
| <b>X-ray Structure 11a</b>                       | <b>S116</b>      |
| <b>X-ray Structure 12g</b>                       | <b>S118</b>      |

## General Experimental

Moisture and oxygen sensitive reactions were carried out in flame-dried glassware under a nitrogen atmosphere. Solvents were dried by passage through an activated alumina column under nitrogen. All organic reagents were used as purchased. Flash chromatography was performed using 32 – 63  $\mu\text{m}$  silica gel with the indicated solvent systems. Melting points are uncorrected. Low and high resolution mass spectra were obtained according to the specified technique and were performed at the Proteomics and Mass Spectrometry Core Facility at the Pennsylvania State University. Copies of  $^1\text{H}$  and  $^{13}\text{C}$  NMR spectra are supplied in the Supporting Information as criteria of purity.

### 1-(2-Azidophenyl)but-2-yn-1-ol.

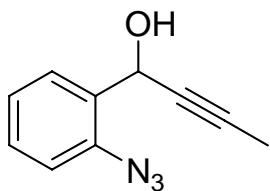

To a solution of 2-azidobenzaldehyde (**8**) (2.0 g, 14 mmol) in 20 mL of THF at  $-20\text{ }^\circ\text{C}$  was added 1-propynylmagnesium bromide (0.50 M, 30 mL, 15 mmol) and the mixture was stirred for 2 h. The reaction mixture was warmed to room temperature over an additional hour and poured into 20 mL of saturated  $\text{NH}_4\text{Cl}$  solution. The organic layer was extracted with 3x30 mL of  $\text{Et}_2\text{O}$  and the combined organic extracts were washed with water and brine, dried over  $\text{Na}_2\text{SO}_4$  and the solvent was evaporated to yield a brown oil. The crude material was carried over to the next step. A small batch was purified by column chromatography (40%  $\text{Et}_2\text{O}$  in hexanes) to give a white solid: mp  $49 - 50\text{ }^\circ\text{C}$ ; IR (neat):  $3400, 2125\text{ cm}^{-1}$ ;  $^1\text{H}$  NMR (300 MHz,  $\text{C}_6\text{D}_6$ )  $\delta$  7.69 (m, 1H), 6.86 (m, 2H), 6.61 (m, 1H), 5.67 (d,  $J = 2.1\text{ Hz}$ , 1H), 3.07 (br s, 1H), 1.47 (d,  $J = 2.2\text{ Hz}$ , 3H);  $^{13}\text{C}$  NMR (75 MHz,  $\text{CDCl}_3$ )  $\delta$  137.0, 131.9, 129.4, 128.1, 124.9, 118.0, 82.9, 78.2, 60.3, 3.6; TOFESMS  $m/z$  relative intensity 210.1 ( $\text{MNa}^+$  100%); HRMS (+ES) Calcd for  $\text{C}_{10}\text{H}_9\text{N}_3\text{ONa}$ : 210.0643, Found: 210.0639.

## Representative Procedure 1. Azidophenyl Alkynyl Acetate Synthesis.

### 1-Acetoxy-1(2-azidophenyl)but-2-yne (**9a**).

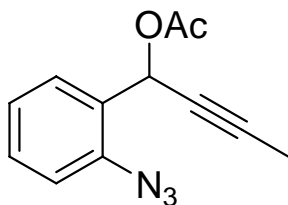

Acetic anhydride (1.2 mL, 13 mmol) and DMAP (1.6 g, 13 mmol) were added to an ice-cold solution of 1-(2-azidophenyl)but-2-yn-1-ol (2.0 g, 11 mmol) in 40 mL of CH<sub>2</sub>Cl<sub>2</sub>, and the mixture was stirred for 24 h with warming to room temperature. The reaction mixture was poured into 30 mL of saturated NaHCO<sub>3</sub> solution. The mixture was then extracted with 3x30 mL of CH<sub>2</sub>Cl<sub>2</sub> and the combined organic layers were washed with water and brine, dried over Na<sub>2</sub>SO<sub>4</sub> and concentrated *in vacuo*. The crude material was purified by column chromatography (25% Et<sub>2</sub>O in hexanes) to give the acetate **9a** as a pale yellow solid (1.5 g, 61%): mp 49 – 50 °C; IR (neat): 2140, 1736 cm<sup>-1</sup>; <sup>1</sup>H NMR (360 MHz, C<sub>6</sub>D<sub>6</sub>) δ 7.75 (dd, *J* = 7.5, 1.8 Hz, 1H), 6.91 (m, 3H), 6.64 (dd, *J* = 7.6, 1.4 Hz, 1H), 1.66 (s, 3H), 1.45 (d, *J* = 2.3 Hz, 3H); <sup>13</sup>C NMR (90 MHz, C<sub>6</sub>D<sub>6</sub>) δ 168.9, 138.1, 130.2, 129.5, 129.3, 124.9, 118.4, 83.6, 76.4, 61.3, 20.4, 3.3; TOFESMS *m/z* (relative intensity) 252.0 (MNa<sup>+</sup>, 100%), 284.0 (MMeOH<sup>+</sup>, 70%); HRMS Calcd for C<sub>12</sub>H<sub>11</sub>N<sub>3</sub>O<sub>2</sub>Na : 252.0749, Found: 252.0762.

## Representative Procedure 2. Allenylazide Synthesis.

### 1-(2-Azidophenyl)3-methylpent-1,2,4-triene (**6a**).

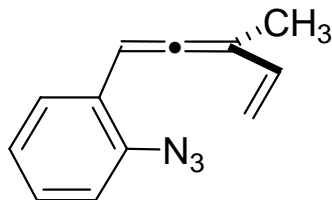

To a solution of ZnCl<sub>2</sub> (0.34 g, 2.5 mmol) in 10 mL of THF was added vinylMgBr (1.0 M in THF, 2.5 mL, 2.5 mmol) and the mixture was stirred at room temperature for 1 h. Pd(PPh<sub>3</sub>)<sub>4</sub> (58 mg, 5.0 mol%) in 2 mL of THF and the propargylic acetate **9a** (0.23 g, 1.0 mmol) in 5 mL of THF were added sequentially. The reaction mixture was stirred at

room temperature for 20 min. After addition of 10 mL of saturated NH<sub>4</sub>Cl solution, the reaction mixture was extracted with 2x20 mL of Et<sub>2</sub>O and the combined organic layers were washed with water and brine. Drying over Na<sub>2</sub>SO<sub>4</sub> and removal of solvent under reduced pressure resulted in a brown oil. The crude product was purified by flash chromatography using pure hexanes as the eluent to give **6a** as a pale yellow oil (114 mg, 58%). IR (neat): 2120, 1930 cm<sup>-1</sup>; <sup>1</sup>H NMR (400 MHz, CDCl<sub>3</sub>) δ 7.36 (d, *J* = 7.4 Hz, 1H), 7.27 (d, *J* = 7.4, 1H), 7.16 (d, *J* = 7.3 Hz, 1H), 7.10 (t, *J* = 7.3 Hz, 1H), 6.54 (m, 1H), 6.42 (dd, *J* = 17.4, 10.5 Hz, 1H), 5.25 (d, *J* = 17.4 Hz, 1H), 5.15 (d, *J* = 10.5 Hz, 1H), 1.97 (d, *J* = 2.8 Hz, 3H); <sup>13</sup>C NMR (75 MHz, CDCl<sub>3</sub>) δ 210.3, 136.8, 135.0, 128.9, 128.4, 126.3, 125.3, 118.9, 114.0, 104.6, 89.1, 14.9; TOFESMS *m/z* relative intensity 170 (MH<sup>+</sup>-N<sub>2</sub> 100); HRMS (+ES) Calcd for C<sub>12</sub>H<sub>12</sub>N: 170.0970, Found: 170.0977.

### Representative Procedure 3. Allenylazide Synthesis.

#### 1-(2-Azidophenyl)3-cyclohex-1-enylbut-1,2-diene (**6h**).

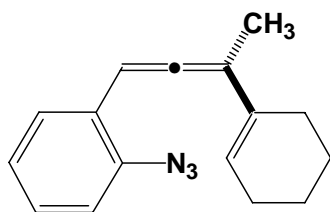

To a solution of CuBr•Me<sub>2</sub>S (2.5 g, 12 mmol) in 20 mL of THF at -40 °C was added MeMgBr (3.0 M in THF, 4.0 mL, 12 mmol) and the mixture was stirred for 1 h, after which acetate **9h** (0.30 g, 1.3 mmol) in 5 mL of THF was cannulated into the reaction mixture at -40 °C. The reaction mixture was warmed to room temperature over a period of 8 h to allow complete consumption of starting material. The excess cuprate was then quenched with drop-wise addition of saturated NH<sub>4</sub>Cl solution. The organic layer was extracted with 3x50 mL of Et<sub>2</sub>O and washed with water and brine. Drying the combined extracts over Na<sub>2</sub>SO<sub>4</sub> and removal of solvent under reduced pressure resulted in a brown oil. The crude product was purified by column chromatography using pure hexanes as the eluent to give **6h** as a pale yellow oil (120 mg, 37%). IR (neat): 2123, 1928 cm<sup>-1</sup>; <sup>1</sup>H NMR (400 MHz, CDCl<sub>3</sub>) δ 7.38 (d, *J* = 7.5 Hz, 1H), 7.24 (d, *J* = 7.3 Hz, 1H), 7.16 (d, *J* = 7.0, 1H), 7.09 (t, *J* = 7.5 Hz, 1H), 6.57 (m, 1H), 5.81 (m, 1H), 2.2 (m, 3H), 2.07 (m, 1H), 1.97 (d, *J* = 2.7 Hz, 3H), 1.63-1.68 (m, 4H); <sup>13</sup>C NMR (75 MHz, CDCl<sub>3</sub>) δ 207.6, 136.5,

133.4, 128.4, 128.2, 127.2, 125.2, 123.9, 118.8, 107.1, 90.5, 27.4, 26.4, 23.2, 22.7, 16.3 ; TOFESMS  $m/z$  relative intensity 224 ( $MH^+ - N_2$  100); HRMS (+ES) Calcd for  $C_{16}H_{18}N$ : 224.1439, Found: 224.1459

#### Representative Procedure 4. Cyclization.

A deoxygenated solution of allenylazide **6a** (35 mg, 0.18 mmol) in toluene- $d_8$ , (1.8 mL) was heated at 110 °C in a clean, sealed tube for 15 min, after which the reaction mixture was cooled to room temperature. Evaporation of the solvent *in vacuo* gave a brown oil. The ratio of the products was determined at this stage by  $^1H$  NMR analysis. Purification of this crude oil using an alumina column resulted in two products; **7a** (80% Et<sub>2</sub>O in hexanes, 12 mg, 40%) and **11a** (10% Et<sub>2</sub>O in hexanes 17 mg, 56%).

#### 3-Methyl-1,4-dihydrocyclopenta[b]indole (**7a**).

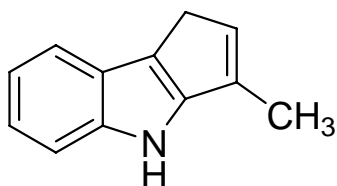

IR (neat): 3406  $cm^{-1}$ ;  $^1H$  NMR (300 MHz,  $CDCl_3$ )  $\delta$  8.03 (bs, 1H), 7.58 (d,  $J = 7.43$  Hz, 1H), 7.41 (d,  $J = 7.8$  Hz, 1H), 7.09-7.24 (m, 2H), 6.22 (m, 1H), 3.25 (s, 2H), 2.22 (d,  $J = 1.6$  Hz, 3H);  $^{13}C$  NMR (75 MHz,  $CDCl_3$ )  $\delta$  148.7, 140.5, 132.7, 131.6, 125.2, 121.0, 120.6, 120.3, 118.5, 112.3, 31.9, 13.5; TOFESMS  $m/z$  relative intensity 170 ( $MH^+ 35$ ); HRMS (+ES) Calcd for  $C_{12}H_{12}N$ :170.0970, Found: 170.0967.

#### 1-Methyl-9H-pyrrolo[1,2-a]indole (**11a**).

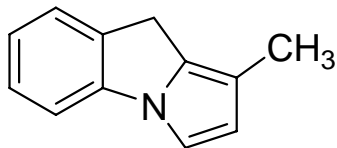

Crystals suitable for X-ray crystallographic analysis were obtained by slow evaporation of an Et<sub>2</sub>O solution of **11a** over a period of 48 h at 25 °C.  $^1H$  NMR (300 MHz,  $CDCl_3$ )  $\delta$  7.42 (d,  $J = 7.4$  Hz, 1H), 7.24-7.33 (m, 2H), 7.10 (t,  $J = 7.3$  Hz, 1H), 7.05 (d,  $J = 2.6$  Hz, 1H), 6.25 (d,  $J = 2.6$  Hz, 1H), 3.77 (s, 2H), 2.18 (s, 3H);  $^{13}C$  NMR (75 MHz,  $CDCl_3$ )  $\delta$  141.8, 135.3, 132.7, 127.7, 126.3, 123.0, 114.8, 111.9, 109.8, 109.6, 28.4, 11.7;



TOFESMS  $m/z$  relative intensity 170 ( $MH^+$  35); HRMS (+ES) Calcd for  $C_{12}H_{12}N$ :170.0970, Found: 170.0967.

### Representative Procedure 5. Azidophenyl Alkynyl Alcohol Synthesis.

#### 1-*t*-Butyldimethylsilyloxy-4-(2-azidophenyl)but-2-yn-4-ol.

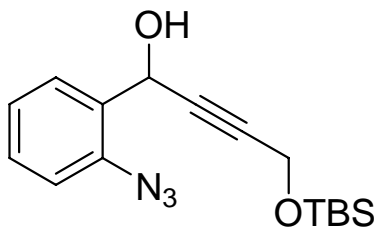

A solution of 1-*t*-butyldimethylsilyloxybut-2-yne (0.68 g, 4.0 mmol) in THF (20 mL) was cooled to  $-78$  °C and *n*-butyllithium (2.3 M in hexanes, 1.8 mL, 4.0 mmol) was added. The reaction mixture was stirred at  $-78$  °C for 30 min. 2-Azidobenzaldehyde (**8**) (0.59 g, 4.0 mmol) in 5 mL of THF was cannulated into the reaction mixture and the reaction was warmed to room temperature over a period of 2 h. The reaction mixture was poured into 10 mL of saturated  $NH_4Cl$  solution and extracted with 3x30 mL of  $Et_2O$ . The combined organic layers were washed with water and brine, dried over  $Na_2SO_4$  and the solvent was evaporated. The crude alcohol was purified by flash chromatography using 40%  $Et_2O$  in hexanes to give 1.2 g (96%) of the alcohol as yellow oil. IR (neat): 3404, 2127  $cm^{-1}$ ;  $^1H$  NMR (400 MHz,  $CDCl_3$ )  $\delta$  7.64 (d,  $J = 7.8$  Hz, 1H), 7.39 (t,  $J = 7.6$  Hz, 1H), 7.19 (d,  $J = 7.3$  Hz, 2H), 5.68 (m, 1H), 4.44 (s, 2H), 0.91 (s, 9H), 0.12 (s, 6H);  $^{13}C$  NMR (75 MHz,  $CDCl_3$ )  $\delta$  137.7, 131.5, 130.1, 128.8, 125.5, 118.7, 85.7, 84.0, 61.1, 52.2, 26.2, 18.7, -4.8; TOFESMS  $m/z$  relative intensity 318 ( $MH^+$  30); HRMS (+ES) Calcd for  $C_{16}H_{24}N_3O_2Si$ : 318.1638, Found: 318.1636.

### Representitive Procedure 6. Thermolysis of Crude Phenyl-substituted Allenylazides.

#### 2-(1-Phenyl-vinyl)-1H-indole (14j)

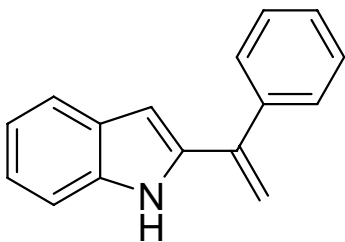

To a solution of propargyl acetate **9a** (77 mg, 0.34 mmol) and Pd(PPh<sub>3</sub>)<sub>4</sub> (35 mg, 0.03 mmol) in 3.4 mL of THF was added drop-wise phenylzinc bromide (0.50 M in THF, 1.0 mL, 0.50 mmol) and the reaction mixture was stirred at room temperature for 1 h, and then brought to reflux and held there for 14 h. The reaction mixture was allowed to cool to room temperature and added to 30 mL of ice-cold saturated NH<sub>4</sub>Cl solution. The mixture was extracted with Et<sub>2</sub>O (3x30 mL), and the combined organic layers were washed with water and brine, then dried over MgSO<sub>4</sub> and concentrated *in vacuo*. This crude material was purified by column chromatography (5% EtOAc in hexanes) to give the product **14j** as a yellow oil (25 mg, 34%). IR (neat): 3416 cm<sup>-1</sup>; <sup>1</sup>H NMR (400 MHz, (CD<sub>3</sub>)<sub>2</sub>CO) δ 10.30 (br s, 1H), 7.51-7.48 (m, 3H), 7.42-7.36 (m, 4H), 7.10 (m, 1H), 6.99 (m, 1H), 6.30 (dd, *J* = 2.2, 0.8 Hz, 1H), 5.76 (s, 1H), 5.33 (d, *J* = 0.6 Hz, 1H); <sup>13</sup>C NMR (100 MHz, (CD<sub>3</sub>)<sub>2</sub>CO) δ 143.0, 141.5, 138.8, 138.3, 129.5, 129.3, 129.1, 128.9, 123.1, 121.3, 120.3, 112.7, 111.9, 104.0; APCI *m/z* (relative intensity) 220.1 (MH<sup>+</sup>, 100%); HRMS Calcd for C<sub>16</sub>H<sub>14</sub>N: 220.1126, Found: 220.1121.

**1-*t*-Butyldimethylsilyloxy-4-acetoxy-4-(2-azidophenyl)but-2-yne (9b).**

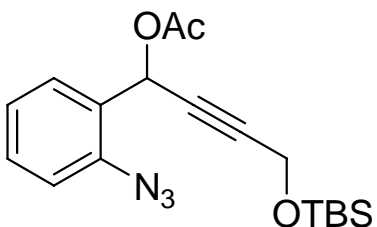

Following representative procedure (1) for acetate synthesis, 1-*t*-butyldimethylsilyloxy-4-(2-azidophenyl)but-2-yn-4-ol (1.3 g, 3.9 mmol) was converted to acetate **9b** (1.3 g, 92%). IR (neat): 2127, 1745 cm<sup>-1</sup>; <sup>1</sup>H NMR (400 MHz, CDCl<sub>3</sub>) δ 7.69 (d, *J* = 7.6 Hz, 1H), 7.40 (t, *J* = 7.6 Hz, 1H), 7.18 (d, *J* = 7.8 Hz, 2H), 6.68 (m, 1H), 4.44 (d, *J* = 1.8 Hz, 2H), 2.11 (s, 3H), 0.91 (s, 9H), 0.11 (s, 3H), 0.10 (s, 3H); <sup>13</sup>C NMR (75 MHz, CDCl<sub>3</sub>) δ 169.8,

138.2, 130.7, 129.7, 128.3, 125.3, 118.6, 86.3, 81.2, 61.2, 52.2, 26.1, 21.3, 18.6, -4.8; TOFESMS  $m/z$  relative intensity 360 ( $MH^+$  80); HRMS (+ES) Calcd for  $C_{18}H_{26}N_3O_3Si$ : 360.1743, Found: 360.1731.

**1-*t*-butyldimethylsilyloxy-5-(2-azidophenyl)pent-3-yn-5-ol.**

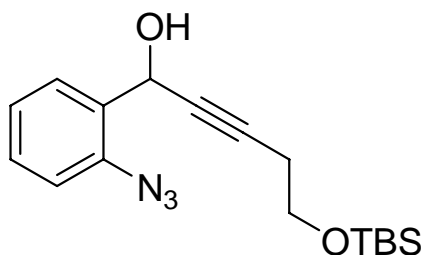

Following the representative procedure (5) for alcohol synthesis, 2-azidobenzaldehyde (8) (0.66 g, 4.4 mmol) was treated with 1-*t*-butyldimethylsilyloxypent-3-ynyllithium (1.0 equiv, 4.4 mmol) to give 1-*t*-butyldimethylsilyloxy-5-(2-azidophenyl)pent-3-yn-5-ol as a yellow oil (1.3 g, 96%). IR (neat): 3423, 2110  $cm^{-1}$ ;  $^1H$  NMR (400 MHz,  $CDCl_3$ )  $\delta$  7.68 (d,  $J = 7.5$  Hz, 1H), 7.37 (t,  $J = 7.2$  Hz, 1H), 7.18 (t,  $J = 7.3$  Hz, 2H), 5.64 (m, 1H), 3.76 (t,  $J = 7.1$  Hz, 2H), 2.50 (dt,  $J = 7.0, 1.8$  Hz, 2H), 0.91 (s, 9H), 0.08 (s, 6H);  $^{13}C$  NMR (75 MHz,  $CDCl_3$ )  $\delta$  137.8, 132.3, 130.1, 128.9, 125.5, 118.7, 85.0, 80.4, 62.1, 61.2, 26.3, 23.7, 18.7, -4.9 (2C); TOFESMS  $m/z$  relative intensity 332 ( $MH^+$  40); HRMS (+ES) Calcd for  $C_{17}H_{26}N_3O_2Si$ : 332.1794, Found: 332.1780.

**1-*t*-Butyldimethylsilyloxy-5-acetoxy-5-(2-azidophenyl)pent-3-yne (9c).**

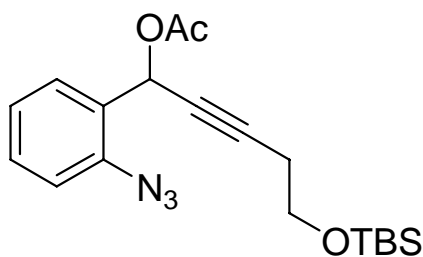

Following representative procedure (1) for acetate synthesis, 1-*t*-butyldimethylsilyloxy-5-(2-azidophenyl)pent-3-yn-5-ol (1.3g, 3.9 mmol) was converted to acetate 9c (1.2 g, 82%). IR (neat): 2129, 1747  $cm^{-1}$ ;  $^1H$  NMR (400 MHz,  $CDCl_3$ )  $\delta$  7.71 (d,  $J = 7.7$  Hz, 1H), 7.41 (dt,  $J = 7.7, 1.5$  Hz, 1H), 7.19 (t,  $J = 7.7$  Hz, 2H), 6.64 (t,  $J = 2.0$  Hz, 1H), 3.75 (t,  $J = 6.9$  Hz, 2H), 2.49 (dt,  $J = 6.9, 2.1$  Hz, 1H), 2.11 (s, 3H), 0.89 (s, 9H), 0.07 (s, 6H);  $^{13}C$  NMR (75 MHz,  $CDCl_3$ )  $\delta$  169.9, 138.2, 130.6, 129.9, 128.9, 125.4, 118.7, 85.7.3, 82.2,

61.9 61.5, 26.3, 23.7, 21.4, 18.7, -4.9 (2C); TOFESMS  $m/z$  relative intensity 396 ( $MNa^+$  65); HRMS (+ES) Calcd for  $C_{19}H_{27}N_3O_3SiNa$ : 396.1719, Found: 396.1716.

**1-(2-Azidophenyl)4,4-dimethylpent-2-yn-1-ol.**

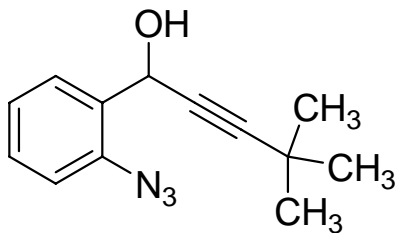

Following the representative procedure (5) for alcohol synthesis, 2-azidobenzaldehyde (8) (0.60 g, 4.0 mmol) was treated with 3,3-dimethylbutynyllithium (1.0 equiv, 4.0 mmol) to give 1-(2-azidophenyl)4,4-dimethylpent-2-yn-1-ol as a yellow oil (800 mg, 87%). IR (neat): 3375, 2128  $cm^{-1}$ ;  $^1H$  NMR (400 MHz,  $CDCl_3$ )  $\delta$  7.69 (d,  $J = 7.6$  Hz, 1H), 7.37 (t,  $J = 7.5$  Hz, 1H), 7.17-7.28 (m, 2H), 5.67 (s, 1H), 2.53 (bs, 1H) 1.28 (s, 9H);  $^{13}C$  NMR (75 MHz,  $CDCl_3$ )  $\delta$  137.9, 132.6, 130.0, 128.9, 125.4, 118.7, 96.4, 77.7, 60.1, 31.3 27.9; TOFESMS  $m/z$  relative intensity 230 ( $MH^+$  80); HRMS (+ES) Calcd for  $C_{12}H_{16}N_3O$ : 230.1293, Found: 230.1280.

**1-Acetoxy-1-(2-azidophenyl)4,4-dimethylpent-2-yne (9d).**

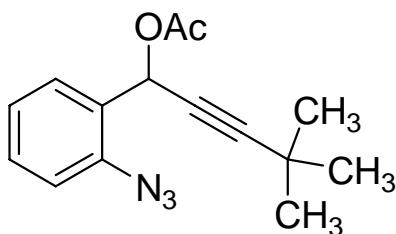

Following representative procedure (1) for acetate synthesis, 1-(2-azidophenyl)4,4-dimethylpent-2-yn-1-ol (0.80 g, 3.5 mmol) was converted to acetate 9d (850 mg, 90%). IR (neat): 2127, 1745  $cm^{-1}$ ;  $^1H$  NMR (400 MHz,  $CDCl_3$ )  $\delta$  7.72 (d,  $J = 7.8$  Hz, 1H), 7.39 (t,  $J = 7.7$  Hz, 1H), 7.20 (t,  $J = 8.3$  Hz, 2H), 6.64 (s, 1H), 2.10 (s, 3H), 1.26 (s, 9H);  $^{13}C$  NMR (75 MHz,  $CDCl_3$ )  $\delta$  169.9, 138.4, 130.5, 130.0, 129.1, 125.3, 118.7, 96.7, 74.9 61.6, 31.2, 27.9, 21.5; TOFESMS  $m/z$  relative intensity 272 ( $MH^+$  32); HRMS (+MSES) Calcd for  $C_{15}H_{18}N_3O_2$ : 272.1399, Found: 272.1392.

### 1-(2-Azidophenyl)5-phenylpent-4-en-2-yn-ol.

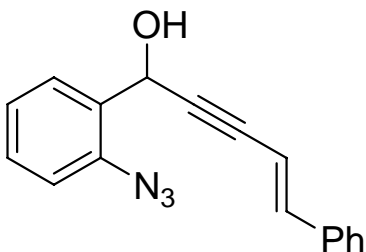

Following the representative procedure (**5**) for alcohol synthesis, 2-azidobenzaldehyde (**8**) (0.46 g, 3.1 mmol) was treated with 4-phenylbut-3-en-1-ynyllithium (1.0 equiv, 3.1 mmol) to give 1-(2-azidophenyl)5-phenylpent-4-en-2-yn-ol as a bright yellow oil (460 mg, 54%). IR (neat): 3396, 2126  $\text{cm}^{-1}$ ;  $^1\text{H}$  NMR (400 MHz,  $\text{CDCl}_3$ )  $\delta$  7.71 (dd,  $J = 8.1$ , 1.3 Hz, 1H), 7.44-7.23 (m, 8H), 7.02 (d,  $J = 16.3$  Hz, 1H), 6.24 (dd,  $J = 16.3$ , 1.9 Hz, 1H), 5.84 (m, 1H), 2.75 (bs, 1H);  $^{13}\text{C}$  NMR (75 MHz,  $\text{CDCl}_3$ )  $\delta$  142.6, 137.8, 136.5, 132.2, 130.2, 129.3, 129.2, 128.9, 126.8, 125.6, 118.8, 107.8, 90.7, 86.1, 61.5; TOFESMS  $m/z$  relative intensity 276 ( $\text{MH}^+$  30); HRMS (+ES) Calcd for  $\text{C}_{13}\text{H}_{15}\text{N}_3\text{O}$ : 276.1137, Found: 276.1123.

### 1-Acetoxy-1-(2-azidophenyl) 5-phenylpent-4-en-2-yn-ol (**9g**).

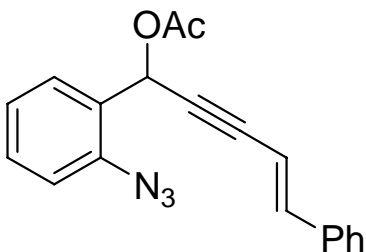

Following representative procedure (**1**) for acetate synthesis, 1-(2-azidophenyl)5-phenylpent-4-en-2-yn-ol (0.40 g, 1.6 mmol) was converted to acetate **9g** (460 mg, 91%). IR (neat): 2127, 1742  $\text{cm}^{-1}$ ;  $^1\text{H}$  NMR (400 MHz,  $\text{CDCl}_3$ )  $\delta$  7.78 (dd,  $J = 7.8$ , 1.3 Hz, 1H), 7.44-7.20 (m, 8H), 7.04 (d,  $J = 16.3$  Hz, 1H), 6.87 (d,  $J = 1.8$  Hz, 1H) 6.22 (dd,  $J = 16.3$ , 2.0 Hz, 1H), 2.16 (s, 3H);  $^{13}\text{C}$  NMR (75 MHz,  $\text{CDCl}_3$ )  $\delta$  170.0, 143.2, 138.3, 136.3, 130.8, 129.8, 129.4, 129.2, 128.6, 126.8, 125.5, 118.8, 107.5, 87.5, 86.7, 61.9, 21.4; TOFESMS  $m/z$  relative intensity 318 ( $\text{MH}^+$  68); HRMS (+ES) Calcd for  $\text{C}_{19}\text{H}_{16}\text{N}_3\text{O}_2$ : 318.1243, Found: 318.1261.

### 1-(2-Azidophenyl)3-cyclohex-1-enylprop-2-yn-1-ol.

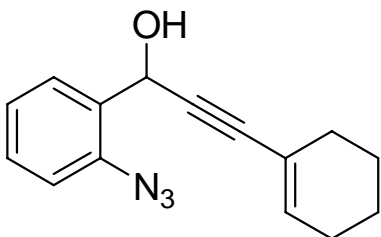

Following the representative procedure (5) for alcohol synthesis, 2-azidobenzaldehyde (8) (0.50 g, 3.4 mmol) was treated with 1-cyclohexenylethynyllithium (0.85 equiv, 2.9 mmol) to give 1-(2-azidophenyl)3-cyclohex-1-enylprop-2-yn-1-ol as a yellow oil (280 mg, 38%). IR (neat): 3390, 2126  $\text{cm}^{-1}$ ;  $^1\text{H}$  NMR (300 MHz,  $\text{CDCl}_3$ )  $\delta$  7.67 (d,  $J = 7.7$  Hz, 1H), 7.36 (m, 1H), 7.19-7.11 (m, 2H), 6.16 (m, 1H), 5.76 (d,  $J = 4.6$  Hz, 1H), 3.23 (d,  $J = 5.3$  Hz, 1H), 2.15-2.09 (m, 4H), 1.64-1.58 (m, 4H);  $^{13}\text{C}$  NMR (75 MHz,  $\text{CDCl}_3$ )  $\delta$  137.7, 136.1, 132.5, 130.0, 128.9, 125.5, 120.5, 118.7, 88.7, 85.9, 61.1, 29.5, 26.1, 22.7, 21.9; TOFESMS  $m/z$  relative intensity 254 ( $\text{MH}^+$  75); HRMS (+ES) Calcd for  $\text{C}_{15}\text{H}_{16}\text{N}_3\text{O}$ : 254.1293, Found: 254.1302.

**1-Acetoxy-1-(2-azidophenyl) 3-cyclohex-1-enylprop-2-yne (9h).**

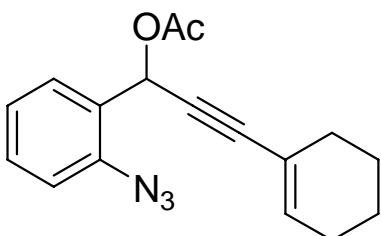

Following representative procedure (1) for acetate synthesis, 1-(2-azidophenyl)3-cyclohex-1-enylprop-2-yn-1-ol (0.28 g, 1.1 mmol) was converted to acetate 9h (260 mg, 80%). IR (neat): 2127, 1742  $\text{cm}^{-1}$ ;  $^1\text{H}$  NMR (400 MHz,  $\text{CDCl}_3$ )  $\delta$  7.72 (dd,  $J = 7.5, 1.3$  Hz, 1H), 7.42 (dd,  $J = 7.2, 1.5$  Hz, 1H), 7.18-7.22 (m, 2H), 6.76 (m, 1H), 6.20 (m, 1H), 2.11 (s, 3H), 2.16-2.10 (m, 4H), 1.67-1.55 (m, 4H);  $^{13}\text{C}$  NMR (75 MHz,  $\text{CDCl}_3$ )  $\delta$  169.9, 138.2, 137.0, 130.6, 129.8, 128.9, 125.4, 120.2, 118.7, 89.3, 82.7, 61.7, 29.3, 26.0, 22.6, 21.8, 21.5; TOFESMS  $m/z$  relative intensity 318 ( $\text{MNa}^+$  100); HRMS (+ES) Calcd for  $\text{C}_{17}\text{H}_{17}\text{N}_3\text{O}_2\text{Na}$ : 318.1203, Found: 318.1218.

**1-(2-Azidophenyl)3-cyclopent-1-enylprop-2-yn-1-ol.**

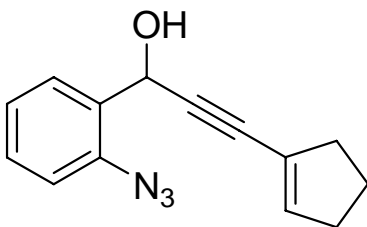

Following the representative procedure (**5**) for alcohol synthesis, 2-azidobenzaldehyde (**8**) (0.35 g, 2.4 mmol) was treated with 1-cyclopentynylethynyllithium (1.3 equiv, 3.2 mmol) to give 1-(2-Azidophenyl)3-cyclopent-1-enylprop-2-yn-1-ol as a yellow oil (330 mg, 54%). IR (neat): 3354, 2126  $\text{cm}^{-1}$ ;  $^1\text{H}$  NMR (400 MHz,  $\text{CDCl}_3$ )  $\delta$  7.67 (dd,  $J = 8.2$ , 1.6 Hz, 1H), 7.43 (m, 1H), 7.22-7.15 (m, 2H), 6.12 (t,  $J = 2.4$  Hz, 1H), 5.80 (d,  $J = 6.2$  Hz, 1H), 2.61 (d,  $J = 6.1$  Hz, 1H), 2.51-2.42 (m, 4H), 1.96-1.89 (m, 2H);  $^{13}\text{C}$  NMR (75 MHz,  $\text{CDCl}_3$ )  $\delta$  139.0, 137.4, 131.7, 129.8, 128.5, 125.1, 123.8, 118.3, 88.9, 84.1, 61.2, 36.3, 33.3, 23.3; TOFESMS  $m/z$  relative intensity 240 ( $\text{MH}^+ 30$ ); HRMS (+ES) Calcd for  $\text{C}_{14}\text{H}_{14}\text{N}_3\text{O}$ : 240.1127, Found: 240.1137.

**1-Acetoxy-1(2-azidophenyl) 3-cyclopent-1-enylprop-2-yne (9i).**

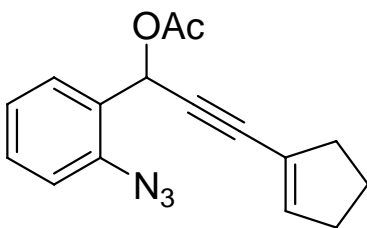

Following representative procedure (**1**) for acetate synthesis, 1-(2-azidophenyl)3-cyclopent-1-enylprop-2-yn-1-ol (0.33 g, 1.3 mmol) was converted to acetate **9i** (330 mg, 88%). IR (neat): 2126, 1746  $\text{cm}^{-1}$ ;  $^1\text{H}$  NMR (400 MHz,  $\text{CDCl}_3$ )  $\delta$  7.71 (d,  $J = 8.6$  Hz, 1H), 7.42 (d,  $J = 7.7$  Hz, 1H), 7.25-7.18 (m, 2H), 6.79 (m, 1H), 6.22 (m, 1H), 2.62-2.45 (m, 4H), 2.12 (s, 3H), 1.96-1.88 (m, 2H);  $^{13}\text{C}$  NMR (75 MHz,  $\text{CDCl}_3$ )  $\delta$  169.9, 140.1, 138.3, 130.6, 129.8, 128.7, 125.4, 124.0, 118.7, 86.4, 84.8, 61.9, 36.6, 33.7, 23.7, 21.5; TOFESMS  $m/z$  relative intensity 282 ( $\text{MH}^+ 30$ ); HRMS (+ES) Calcd for  $\text{C}_{16}\text{H}_{16}\text{N}_3\text{O}_2$ : 282.1243, Found: 282.1229.

**1-*t*-Butyldimethylsilyloxy-2-vinyl-4-(2-azidophenyl)but-2,3-diene (6b).**

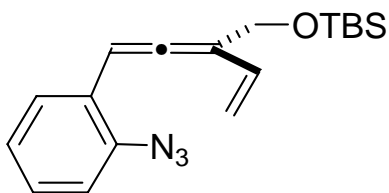

Following representative procedure (2) for allenylazide synthesis, acetate **9b** (0.50 g, 1.4 mmol) was converted to **6b** (250 mg, 55%). IR (neat): 2122, 1934  $\text{cm}^{-1}$ ;  $^1\text{H}$  NMR (400 MHz,  $\text{CDCl}_3$ )  $\delta$  7.39 (dd,  $J = 7.7, 1.5$  Hz, 1H), 7.29 (m, 1H), 7.18-7.09 (m, 2H), 6.10 (m, 1H), 6.38 (dd,  $J = 17.7, 10.1$  Hz, 1H), 5.38 (dd,  $J = 17.4, 1.1$  Hz, 1H), 5.16 (d,  $J = 10.5, 1.2$  Hz, 1H), 4.48 (d,  $J = 2.5$  Hz, 2H), 0.9 (s, 9H), 0.09 (s, 3H), 0.08 (s, 3H);  $^{13}\text{C}$  NMR (75 MHz,  $\text{CDCl}_3$ )  $\delta$  209.0, 136.8, 132.0, 129.0, 128.7, 125.9, 125.2, 118.8, 115.1, 109.8, 91.9, 61.9, 26.2, 18.7, -4.8, -4.9; TOFESMS  $m/z$  relative intensity 300 ( $\text{MH}^+ - \text{N}_2$  100); HRMS (+ES) Calcd for  $\text{C}_{18}\text{H}_{26}\text{NOSi}$ : 300.1784, Found: 300.1812.

**1-*t*-Butyldimethylsilyloxy-3-vinyl-5-(2-azidophenyl)but-3,4-diene (6c).**

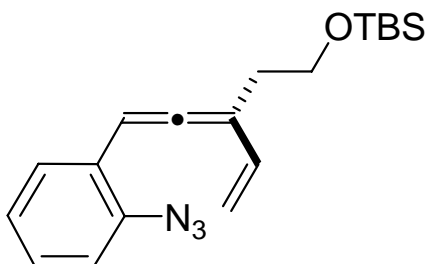

Following representative procedure (2) for allenylazide synthesis, acetate **9c** (0.50 g, 1.3 mmol) was converted to **6c** (259 mg, 57%). IR (neat): 2122, 1930  $\text{cm}^{-1}$ ;  $^1\text{H}$  NMR (400 MHz,  $\text{CDCl}_3$ )  $\delta$  7.36 (d,  $J = 7.9$  Hz, 1H), 7.25 (d,  $J = 7.3$  Hz, 1H), 7.15 (d,  $J = 8.0$  Hz, 1H), 7.08 (t,  $J = 7.5$  Hz, 1H), 6.59 (m, 1H), 6.32 (dd,  $J = 17.5, 10.7$  Hz, 1H), 5.29 (d,  $J = 17.6$  Hz, 1H), 5.13 (d,  $J = 10.7$  Hz, 1H), 3.81 (t,  $J = 5.8$  Hz, 2H), 2.54-2.49 (m, 2H), 0.89 (s, 9H), 0.06 (s, 3H), 0.04 (s, 3H);  $^{13}\text{C}$  NMR (75 MHz,  $\text{CDCl}_3$ )  $\delta$  209.8, 136.7, 134.3, 128.8, 128.6, 126.1, 125.2, 118.9, 114.0, 106.2, 90.6, 62.1, 32.1, 26.3, 18.8, -4.8 (2C); TOFESMS  $m/z$  relative intensity 314 ( $\text{MH}^+ - \text{N}_2$  100); HRMS (+ES) Calcd for  $\text{C}_{19}\text{H}_{28}\text{NOSi}$ : 314.1940, Found: 314.1919.

**1-(2-Azidophenyl)3-*t*-butylpent-1,2,4-triene (6d).**



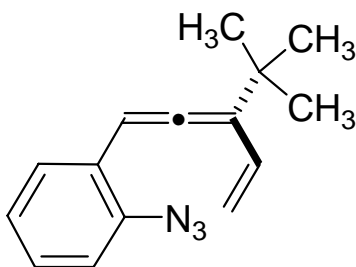

Following representative procedure (2) for allenylazide synthesis, acetate **9d** (0.27 g, 1.0 mmol) was converted to **6d** (150 mg, 63%). IR (neat): 2124, 1930  $\text{cm}^{-1}$ ;  $^1\text{H}$  NMR (400 MHz,  $\text{CDCl}_3$ )  $\delta$  7.43 (dd,  $J = 7.7, 1.4$  Hz, 1H), 7.27 (dt,  $J = 8.1, 1.5$  Hz, 1H), 7.19 (d,  $J = 7.0$  Hz, 1H), 7.12 (t,  $J = 7.6$  Hz, 1H), 6.73 (m, 1H), 6.28 (ddd,  $J = 17.0, 10.4, 1.3$  Hz, 1H), 5.51 (dd,  $J = 17.1, 0.9$  Hz, 1H), 5.26 (dd,  $J = 10.4, 0.9$  Hz, 1H), 1.24 (s, 9H);  $^{13}\text{C}$  NMR (75 MHz,  $\text{CDCl}_3$ )  $\delta$  204.7, 136.6, 130.9, 128.3, 128.0, 126.9, 125.3, 119.0, 118.6, 117.2, 92.3, 34.3, 29.9; TOFESMS  $m/z$  relative intensity 210 ( $\text{MH}^+ - \text{N}_2$  100); HRMS (-ES) Calcd for  $\text{C}_{15}\text{H}_{16}\text{N}$ : 210.1283, Found: 210.1277.

**1-(2-Azidophenyl)3-methyl-5-phenylpent-1,2,4-triene (6e).**

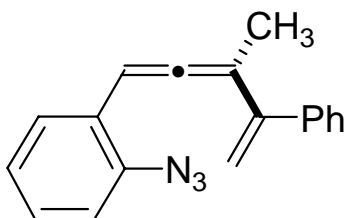

Following representative procedure (2) for allenylazide synthesis, acetate **9a** (0.20 g, 0.88 mmol) was converted to **6e** (160 mg, 67%). IR (neat): 2124, 1932  $\text{cm}^{-1}$ ;  $^1\text{H}$  NMR (300 MHz,  $\text{CDCl}_3$ )  $\delta$  7.25-7.55 (m, 7H), 7.16 (d,  $J = 7.6$  Hz, 2H), 6.48 (m, 1H), 5.41 (s, 1H), 5.32 (s, 1H), 2.19 (d,  $J = 2.7$  Hz, 3H);  $^{13}\text{C}$  NMR (75 MHz,  $\text{CDCl}_3$ )  $\delta$  209.8, 147.2, 141.7, 136.7, 128.6, 128.5, 128.4, 128.1, 128.0, 127.9, 126.4, 118.9, 114.4, 106.1, 90.4, 18.0; TOFESMS  $m/z$  relative intensity 246 ( $\text{MH}^+ - \text{N}_2$  100); HRMS (+ES) Calcd for  $\text{C}_{18}\text{H}_{16}\text{N}$ : 246.1283, Found: 246.1275.

**1-(2-Azidophenyl)3-methyl-4-phenylpent-1,2,4-triene (6f).**

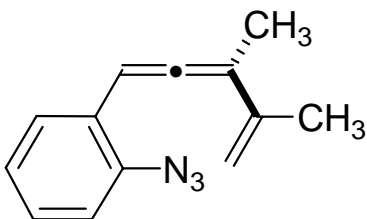

Following representative procedure (2) for allenylazide synthesis, acetate **9a** (0.23 g, 1.0 mmol) was converted to **6e** (125 mg, 59%). IR (neat): 2124, 1930  $\text{cm}^{-1}$ ;  $^1\text{H}$  NMR (300 MHz,  $\text{CDCl}_3$ )  $\delta$  7.41 (d,  $J = 7.7$  Hz, 1H) 7.28 (t,  $J = 7.9$  Hz, 1H), 7.16-7.10 (m, 2H), 6.6 (m, 1H), 5.08 (s, 1H), 5.04 (s, 1H), 2.05 (s, 3H), 2.04 (s, 3H);  $^{13}\text{C}$  NMR (75 MHz,  $\text{CDCl}_3$ )  $\delta$  208.7, 140.8, 136.7, 128.5, 128.4, 126.7, 125.3, 118.9, 112.0, 107.1, 90.3, 22.0, 16.7; TOFESMS  $m/z$  relative intensity 184 ( $\text{MH}^+ - \text{N}_2$  100); HRMS (+ES) Calcd for  $\text{C}_{13}\text{H}_{14}\text{N}$ : 184.1121, Found: 184.1126.

**1-(2-Azidophenyl)3-methyl-4-phenylpent-1,2,4-triene (6g).**

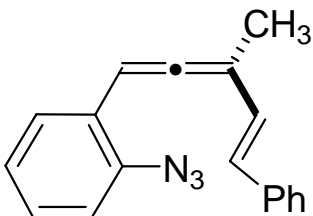

Following representative procedure (3) for allenylazide synthesis, acetate **9g** (0.21 g, 0.65 mmol) was converted to **6e** (60 mg, 34%). IR (neat): 2122, 1927  $\text{cm}^{-1}$ ;  $^1\text{H}$  NMR (300 MHz,  $\text{CDCl}_3$ )  $\delta$  7.55-7.10 (m, 9H), 6.82 (d,  $J = 16.1$  Hz, 1H), 6.63 (m, 1H), 6.56 (d,  $J = 16.2$  Hz, 1H), 2.09 (d,  $J = 2.8$  Hz, 3H);  $^{13}\text{C}$  NMR (75 MHz,  $\text{CDCl}_3$ )  $\delta$  211.6, 137.7, 136.7, 130.5, 129.0, 128.9, 128.8, 128.6, 127.8, 126.9, 126.7, 125.3, 118.9, 104.8, 89.3, 15.7; TOFESMS  $m/z$  relative intensity 246 ( $\text{MH}^+ - \text{N}_2$  100); HRMS (+ES) Calcd for  $\text{C}_{18}\text{H}_{16}\text{N}$ : 246.1283, Found: 246.1289.

**1-(2-Azidophenyl)3-cyclopent-1-enylbut-1,2-diene (6i).**

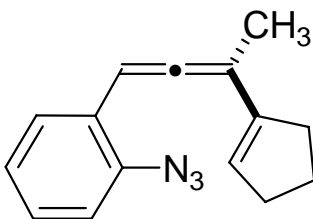

Following representative procedure (3) for allenylazide synthesis, acetate **9i** (0.30 g, 1.1 mmol) was converted to **6e** (75 mg, 30%). IR (neat): 2112, 1930  $\text{cm}^{-1}$ ;  $^1\text{H}$  NMR (400 MHz,  $\text{CDCl}_3$ )  $\delta$  7.38 (dd,  $J = 7.7, 1.5$  Hz, 1H), 7.25 (dt,  $J = 7.0, 1.6$  Hz, 1H), 7.16 (dd,  $J = 7.9, 1.1$  Hz, 1H), 7.09 (dt,  $J = 7.3, 1.8$  Hz, 1H), 6.55 (m, 1H), 5.75 (d,  $J = 1.4$  Hz, 1H), 2.50-2.35 (m, 4H), 2.02 (d,  $J = 2.7$  Hz, 3H), 1.93 (m, 2H);  $^{13}\text{C}$  NMR (100 MHz,  $\text{CDCl}_3$ )  $\delta$  208.8, 140.6, 136.6, 128.6, 128.2, 127.1, 127.0, 125.2, 118.8, 103.0, 89.5, 34.1, 33.8, 23.7, 17.0; APCIMS  $m/z$  relative intensity 210 ( $\text{MH}^+ - \text{N}_2$  100); HRMS (+APMS) Calcd for  $\text{C}_{15}\text{H}_{16}\text{N}$ : 210.1283, Found: 210.1302.

### Cyclization Studies

Following the representative procedure (4) for cyclization, allenylazide **6b** (49 mg, 0.15 mmol) was converted to compounds **7b** (10 mg, 40%) and **11b** (13 mg, 56%).

#### 3-(*t*-Butyldimethylsilyloxymethyl)-1,4-dihydrocyclopenta[b]indole (**7b**).

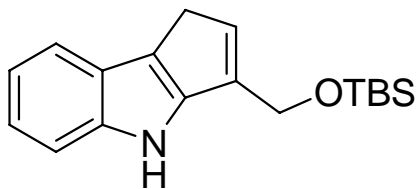

IR (neat): 3395  $\text{cm}^{-1}$ ;  $^1\text{H}$  NMR (300 MHz,  $\text{CDCl}_3$ )  $\delta$  8.23 (bs, 1H), 7.58 (m, 1H), 7.41 (m, 1H), 7.14-7.06 (m, 2H), 6.29 (m, 1H), 4.76 (d,  $J = 1.7$  Hz, 2H), 3.29 (d,  $J = 1.6$  Hz, 2H), 0.97 (s, 1H), 0.14 (s, 6H);  $^{13}\text{C}$  NMR (75 MHz,  $\text{CDCl}_3$ )  $\delta$  147.1, 140.4, 137.8, 129.7, 124.8, 121.2, 120.7, 120.2, 118.5, 112.4, 61.1, 32.0, 29.4, 18.8, -4.8 (2C); TOFESMS  $m/z$  relative intensity 300 ( $\text{MH}^+$  10); HRMS (+ES) Calcd for  $\text{C}_{36}\text{H}_{51}\text{N}_2\text{O}_2\text{Si}_2$ : 599.3489, Found: 599.3466.

#### 1-(*t*-Butyldimethylsilyloxymethyl)-9H-pyrrolo[1,2-a]indole (**11b**).

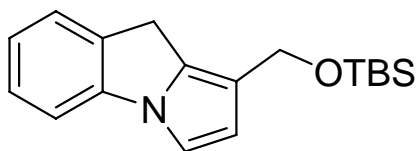

$^1\text{H}$  NMR (300 MHz,  $\text{CDCl}_3$ )  $\delta$  7.41 (d,  $J = 7.5$  Hz, 1H), 7.30-7.24 (m, 2H), 7.09 (t,  $J = 7.3$  Hz, 1H), 7.06 (d,  $J = 2.1$  Hz, 1H), 6.33 (d,  $J = 2.6$  Hz, 1H), 4.73 (s, 2H), 3.85 (s, 2H), 0.96 (s, 9H) 0.13 (s, 6H);  $^{13}\text{C}$  NMR (75 MHz,  $\text{CDCl}_3$ )  $\delta$  141.5, 135.2, 133.0, 127.7, 126.3, 123.3, 117.1, 112.8, 109.94, 109.92, 59.6, 29.1, 26.5, 18.9, -4.7 (2C); TOFESMS

$m/z$  relative intensity 300 ( $MH^+$  10); HRMS (+ES) Calcd for  $C_{36}H_{51}N_2O_2Si_2$ : 599.3489, Found: 599.3466.

Following the representative procedure (4) for cyclization, allenylazide **6c** (25 mg, 0.07 mmol) was converted to compounds **7c** (12 mg, 52%) and **11c** (10 mg, 43%).

**3-(*t*-Butyldimethylsilyloxyethyl)-1,4-dihydrocyclopenta[b]indole (7c).**

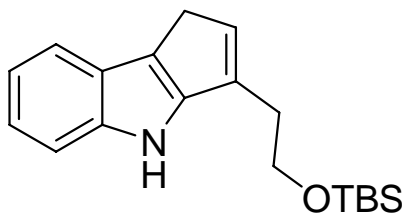

IR (neat):  $3372\text{ cm}^{-1}$ ;  $^1\text{H NMR}$  (300 MHz,  $\text{CDCl}_3$ )  $\delta$  8.8 (bs, 1H), 7.57 (m, 1H), 7.38 (m, 1H), 7.13-7.07 (m, 2H), 6.22 (m, 1H), 3.95 (t,  $J = 5.7\text{ Hz}$ , 2H), 3.25 (s, 2H), 2.82 (t,  $J = 5.6\text{ Hz}$ , 1H), 0.99 (s, 9H), 0.14 (s, 6H);  $^{13}\text{C NMR}$  (75 MHz,  $\text{CDCl}_3$ )  $\delta$  148.5, 140.1, 136.1, 131.9, 125.2, 120.6, 120.4, 120.0, 118.4, 112.2, 63.9, 32.7, 31.8, 26.5, 18.9, -4.9; TOFMSSES  $m/z$  relative intensity 314 ( $MH^+$  25); HRMS (+MSES) Calcd for  $C_{19}H_{28}NOSi$ : 314.1940, Found: 314.1929.

**1-(*t*-Butyldimethylsilyloxyethyl)-9H-pyrrolo[1,2-*a*]indole (11c).**

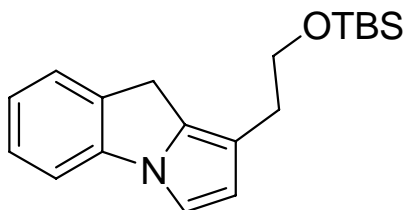

$^1\text{H NMR}$  (300 MHz,  $\text{CDCl}_3$ )  $\delta$  7.40 (d,  $J = 7.6\text{ Hz}$ , 1H), 7.30 (d,  $J = 7.8\text{ Hz}$ , 1H), 7.24 (d,  $J = 7.7\text{ Hz}$ , 1H), 7.07 (t,  $J = 7.4\text{ Hz}$ , 1H), 7.04 (d,  $J = 2.4\text{ Hz}$ , 1H), 6.25 (d,  $J = 2.6\text{ Hz}$ , 1H), 3.84 (t,  $J = 7.7\text{ Hz}$ , 2H), 3.79 (s, 2H), 2.78 (t,  $J = 7.5\text{ Hz}$ , 2H), 0.93 (s, 9H), 0.07 (s, 6H);  $^{13}\text{C NMR}$  (75 MHz,  $\text{CDCl}_3$ )  $\delta$  141.7, 135.1, 133.0, 127.8, 126.3, 123.3, 114.2, 113.6, 109.9, 109.7, 64.5, 31.0, 28.7, 26.4, 18.9, -4.8; TOFESMS  $m/z$  relative intensity 314 ( $MH^+$  25); HRMS (+ES) Calcd for  $C_{19}H_{28}NOSi$ : 314.1940, Found: 314.1929.

Following the representative procedure (4) for cyclization, allenylazide **6d** (60 mg, 0.25 mmol) was converted to compounds **7d** (30 mg, 57%) and **11d** (11 mg, 20%).

**3-*t*-Butyl-1,4-dihydrocyclopenta[b]indole (7d).**

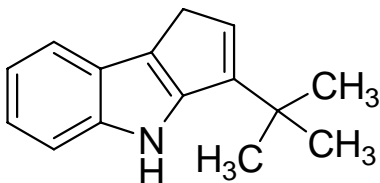

IR (neat): 3414  $\text{cm}^{-1}$ ;  $^1\text{H}$  NMR (400 MHz,  $\text{CDCl}_3$ )  $\delta$  8.09 (bs, 1H), 7.60 (m, 1H), 7.43 (m, 1H), 7.29-7.13 (m, 2H), 6.19 (t,  $J = 1.6$  Hz, 1H), 3.24 (d,  $J = 1.6$  Hz, 2H), 1.4 (s, 9H);  $^{13}\text{C}$  NMR (75 MHz,  $\text{CDCl}_3$ )  $\delta$  147.5, 147.0, 140.5, 127.6, 124.8, 122.1, 120.7, 120.3, 118.5, 112.2, 32.8, 31.2, 30.2; TOFESMS  $m/z$  relative intensity 212 ( $\text{MH}^+$  100); HRMS (+ES) Calcd for  $\text{C}_{15}\text{H}_{18}\text{N}$ : 212.1439, Found: 212.1436.

**1-*t*-Butyl-9H-pyrrolo[1,2-*a*]indole (11d).**

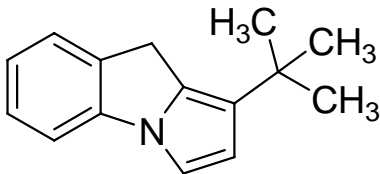

$^1\text{H}$  NMR (400 MHz,  $\text{CDCl}_3$ )  $\delta$  7.38 (d,  $J = 7.4$  Hz, 1H), 7.28-7.22 (m, 2H), 7.07 (dd,  $J = 7.4, 1.2$  Hz, 1H), 7.04 (d,  $J = 2.9$  Hz, 1H), 6.32 (d,  $J = 2.8$  Hz, 1H), 3.92 (s, 2H), 1.36 (s, 9H);  $^{13}\text{C}$  NMR (75 MHz,  $\text{CDCl}_3$ )  $\delta$  141.8, 135.2, 130.1, 127.8, 127.7, 126.0, 123.0, 111.7, 109.7, 109.2, 31.7, 31.3, 30.8; TOFESMS  $m/z$  relative intensity 212 ( $\text{MH}^+$  100); HRMS (+ES) Calcd for  $\text{C}_{15}\text{H}_{18}\text{N}$ : 212.1439, Found: 212.1436.

Following the representative procedure (4) for cyclization allenylazide **6e** (45 mg, 0.16 mmol) was converted to compounds **7e** (16 mg, 40%) and **11e** (12 mg, 30%).

**3-Methyl-2-phenyl-1,4-dihydrocyclopenta[b]indole (7e).**

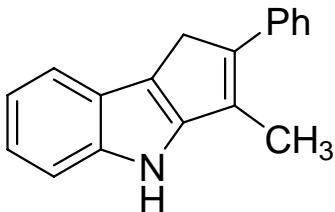

IR (neat): 3414  $\text{cm}^{-1}$ ;  $^1\text{H}$  NMR (400 MHz,  $\text{CDCl}_3$ )  $\delta$  8.07 (bs, 1H), 7.60 (d,  $J = 7.4$  Hz, 1H), 7.52 (m, 2H), 7.45-7.41 (m, 3H), 7.25 (m, 1H), 7.18-7.11 (m, 2H), 3.69 (q,  $J = 1.8$  Hz, 2H), 2.39 (t,  $J = 1.7$  Hz, 3H);  $^{13}\text{C}$  NMR (75 MHz,  $\text{CDCl}_3$ )  $\delta$  150.0, 143.5, 140.2,

138.3, 128.9, 128.1, 127.6, 126.6, 125.1, 120.8, 120.6, 118.7, 118.6, 112.3 34.7, 12.9;  
TOFESMS  $m/z$  relative intensity 246 ( $MH^+$  100); HRMS (+ES) Calcd for  $C_{18}H_{16}N$ :  
246.1283, Found: 246.1262.

**1-Methyl-2-phenyl-9H-pyrrolo[1,2-a]indole (11e).**

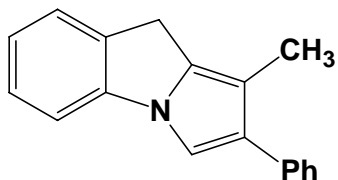

$^1H$  NMR (300 MHz,  $CDCl_3$ )  $\delta$  7.54-7.52 (m, 2H), 7.45-7.40 (m, 3H), 7.34-7.28 (m, 3H),  
7.24 (m, 1H), 7.11 (dt,  $J = 7.2, 1.5$  Hz, 1H), 3.85 (s, 2H), 2.3 (s, 3H);  $^{13}C$  NMR (75  
MHz,  $CDCl_3$ )  $\delta$  141.6, 137.0, 134.8, 134.0, 130.0, 128.8, 128.2, 127.9, 126.3, 126.1,  
123.2, 110.3, 109.9, 107.7, 28.6, 11.4; TOFESMS  $m/z$  relative intensity 246 ( $MH^+$  100);  
HRMS (+ES) Calcd for  $C_{18}H_{16}N$ : 246.1283, Found: 246.1262.

Following the representative procedure (4) for cyclization, allenylazide **6f** (35 mg, 0.17  
mmol) was converted to compounds **7f** (11 mg, 36%) and **11f** (11 mg, 36%).

**2,3-Dimethyl-1,4-dihydrocyclopenta[b]indole (7f).**

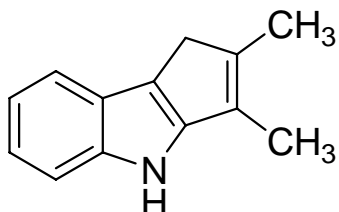

IR (neat):  $3406\text{ cm}^{-1}$ ;  $^1H$  NMR (400 MHz,  $CDCl_3$ )  $\delta$  7.94 (bs, 1H), 7.51 (d,  $J = 7.7$  Hz,  
1H), 7.38 (d,  $J = 7.8$  Hz, 1H), 7.13-7.04 (m, 2H), 3.19 (s, 2H), 2.13 (s, 3H), 2.08 (s, 3H);  
 $^{13}C$  NMR (75 MHz,  $CDCl_3$ )  $\delta$  149.9, 141.6, 139.7, 125.4, 125.3, 120.3, 119.7, 117.9,  
116.9, 112.1, 36.5, 15.0, 10.8; TOFESMS  $m/z$  relative intensity 183 ( $MH^+$  100); HRMS  
(+ES) Calcd for  $C_{13}H_{14}N$ : 184.1126, Found: 184.1095.

**1,1-Dimethyl-9H-pyrrolo[1,2-a]indole (11f).**

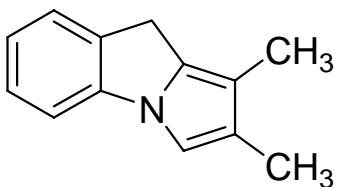

$^1\text{H}$  NMR (300 MHz,  $\text{CDCl}_3$ )  $\delta$  7.37 (d,  $J = 7.3$  Hz, 1H), 7.27 (t,  $J = 7.6$  Hz, 1H), 7.16 (d,  $J = 7.7$  Hz, 1H), 7.02 (t,  $J = 7.2$  Hz, 1H), 6.88 (s, 1H), 3.75 (s, 2H), 2.14 (s, 3H), 2.08 (s, 3H);  $^{13}\text{C}$  NMR (75 MHz,  $\text{CDCl}_3$ )  $\delta$  141.9, 134.7, 132.8, 127.7, 126.1, 124.0, 122.4, 111.6, 109.3, 107.6, 28.5, 11.3, 9.8; TOFESMS  $m/z$  relative intensity 183 ( $\text{MH}^+$  100); HRMS (+ES) Calcd for  $\text{C}_{13}\text{H}_{14}\text{N}$ : 184.1126, Found: 184.1095.

Following the representative procedure (**4**) for cyclization, allenylazide **6g** (35 mg, 0.13 mmol) was converted to compound **10g** (9 mg, 36%).

**1-Methyl-3-phenyl-3H-pyrrolo[1,2-a]indole (10g).**

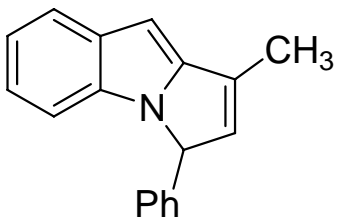

$^1\text{H}$  NMR (400 MHz,  $\text{CDCl}_3$ )  $\delta$  7.66 (dd,  $J = 6.6, 1.7$  Hz, 1H), 7.36-7.30 (m, 3H), 7.21-7.11 (m, 2H), 7.05-7.01 (m, 2H), 6.94 (dd,  $J = 7.7, 1.5$  Hz, 1H), 6.34 (s, 1H), 6.17 (m, 1H), 5.70 (s, 1H), 2.21 (s, 3H);  $^{13}\text{C}$  NMR (75 MHz,  $\text{CDCl}_3$ )  $\delta$  149.0, 138.2, 134.5, 133.9, 133.3, 132.1, 129.3, 128.4, 127.3, 122.0, 121.5, 119.5, 109.8, 90.6, 65.7, 12.9; TOFESMS  $m/z$  relative intensity 246 ( $\text{MH}^+$  20); HRMS (+ES) Calcd for  $\text{C}_{18}\text{H}_{16}\text{N}$ : 246.1283, Found: 246.1259.

**1-Methyl-3-phenyl-2,3-dihydro-1H-pyrrolo[1,2-a]indole (12g).**

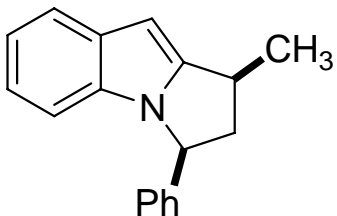

A deoxygenated solution of compound **10g** (9.0 mg, 0.04 mmol) and 5 mg of 10% Pd on carbon in 5 mL of THF was stirred at room temperature under H<sub>2</sub> at 1 atm for 2 h. The solution was then filtered through Celite and concentrated *in vacuo* to afford a yellow oil. The crude compound was purified over an alumina column using 20% Et<sub>2</sub>O in hexanes to give **12g** as a yellow film (6 mg, 54%). Crystals suitable for X-ray crystallographic analysis were obtained by slow evaporation of an Et<sub>2</sub>O solution of **12g** over a period of 48 h at 25 °C. <sup>1</sup>H NMR (400 MHz, CDCl<sub>3</sub>) δ 7.57 (d, *J* = 7.9 Hz, 1H), 7.38-7.35 (m, 3H), 7.28-7.24 (m, 2H), 7.03 (dt, *J* = 7.1, 0.8 Hz, 1H), 6.90 (dt, *J* = 7.1, 1.0 Hz, 1H), 6.59 (d, *J* = 8.1 Hz, 1H), 6.24 (s, 1H), 5.35 (t, *J* = 8.2 Hz, 1H), 3.45 (m, 1H), 3.18 (m, 1H), 2.13 (m, 1H), 1.49 (d, *J* = 6.8 Hz, 3H); <sup>13</sup>C NMR (75 MHz, CDCl<sub>3</sub>) δ 150.6, 141.4, 133.8, 132.6, 129.2, 128.3, 127.1, 120.8, 120.4, 119.6, 110.8, 92.1, 61.9, 49.1, 32.7, 20.1; TOFESMS *m/z* relative intensity 248 (MH<sup>+</sup> 45); HRMS (+ES) Calcd for C<sub>18</sub>H<sub>18</sub>N: 248.1439, Found: 248.1445.

Following the representative procedure (**4**) for cyclization, allenylazide **6h** (31 mg, 0.12 mmol) was converted to compounds **7h** (10 mg, 36%) and **11h** (14 mg, 51%).

**6-Methyl -5,7,8,9-hexahydroindeno[2,1-b]indole (7h).**

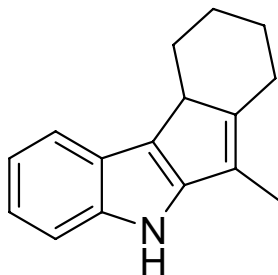

IR (neat): 3406 cm<sup>-1</sup>; <sup>1</sup>H NMR (400 MHz, CDCl<sub>3</sub>) δ 7.95 (bs, 1H), 7.52 (d, *J* = 7.8 Hz, 1H), 7.39 (d, *J* = 8.0 Hz, 1H), 7.10 (t, *J* = 7.1 Hz, 1H), 7.03 (t, *J* = 7.2 Hz, 1H) 3.05 (dd, *J* = 12.5, 5.5 Hz, 1H), 2.8 (m, 1H), 2.68 (m, 1H), 2.27 (m, 1H), 2.08 (s, 3H), 2.6 (m, 1H), 1.85 (m, 1H), 1.28-1.21 (m, 2H), 1.00 (m, 1H); <sup>13</sup>C NMR (75 MHz, CDCl<sub>3</sub>) δ 149.7, 148.8, 136.0, 139.7, 122.3, 121.2, 120.2, 119.6, 117.9, 112.2, 45.2, 33.6, 28.9, 27.3, 26.0, 10.4; TOFESMS *m/z* relative intensity 224 (MH<sup>+</sup> 10); HRMS (+ES) Calcd for C<sub>16</sub>H<sub>18</sub>N: 214.1422, Found: 224.1439.

**11-Methyl-2,3,4,10-tetrahydro-1H-indolo[1,2-a]indole (11h).**



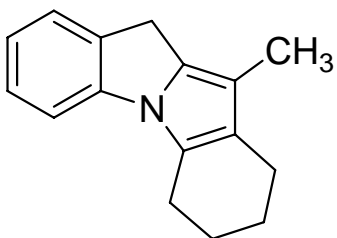

<sup>1</sup>H NMR (400 MHz, CDCl<sub>3</sub>) δ 7.37 (d, *J* = 7.4 Hz, 1H), 7.28-7.24 (m, 2H), 7.05 (m, 1H), 3.74 (s, 2H), 2.96(t, *J* = 5.6 Hz, 2H), 2.51(t, *J* = 6.0 Hz, 2H), 2.04 (s, 3H), 1.95-1.85 (m, 2H), 1.85-1.80 (m, 2H); <sup>13</sup>C NMR (75 MHz, CDCl<sub>3</sub>) δ 142.5, 135.2, 130.6, 127.6, 126.2, 122.5, 122.0, 121.6, 110.2, 109.5, 28.1, 23.8, 23.7, 23.2, 22.4, 9.6; TOFESMS *m/z* relative intensity 224 (MH<sup>+</sup> 10); HRMS (+ES) Calcd for C<sub>16</sub>H<sub>18</sub>N: 214.1422, Found: 224.1439.

Following the representative procedure (**4**) for cyclization, allenylazide **6i** (40 mg, 0.17 mmol) was converted to compound **10i** (14 mg, 40%),

**Pyrrolo-indole (10i)**

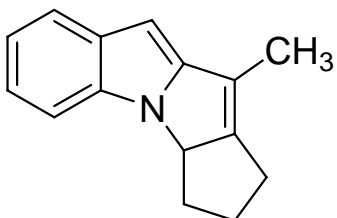

<sup>1</sup>H NMR (400 MHz, CDCl<sub>3</sub>) δ 7.59 (d, *J* = 8.2 Hz, 1H), 7.25 (s, 1H), 7.12 (t, *J* = 7.3 Hz, 1H), 7.03 (t, *J* = 7.1 Hz, 1H), 6.11 (s, 1H), 4.8 (t, *J* = 8.5 Hz, 1H), 2.46-2.27 (m, 6H), 2.04 (s, 3H); <sup>13</sup>C NMR (75 MHz, CDCl<sub>3</sub>) δ 154.1, 152.2, 135.2, 132.8, 123.4, 121.7, 121.0, 119.1, 108.9, 89.1, 66.3, 29.7, 27.8, 21.2, 11.2; TOFMSES *m/z* relative intensity 210 (MH<sup>+</sup> 10); HRMS (+MSES) Calcd for C<sub>15</sub>H<sub>16</sub>N: 210.1283, Found: 210.1274.

**2-[1-(4-Methoxy-phenyl)-vinyl]-1H-indole (14k)**

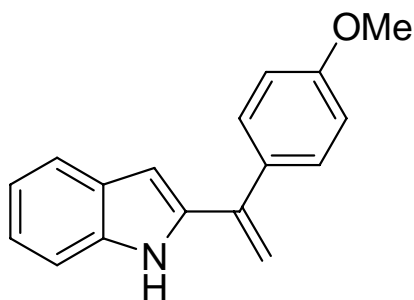

Following representative procedure (6) for crude thermolysis, propargyl acetate **9a** (78 mg, 0.34 mmol) was treated with 4-methoxyphenylzinc iodide (0.50M in THF, 1.0 mL, 0.51 mmol) to give compound **14k** (30 mg, 35%) as a yellow solid: mp 145 - 146 °C; IR (neat): 3429  $\text{cm}^{-1}$ ;  $^1\text{H}$  NMR (300 MHz,  $(\text{CD}_3)_2\text{CO}$ )  $\delta$  10.35 (br s, 1H), 7.49 (dd,  $J$  = 6.8, 1.0 Hz, 1H), 7.42 (dd,  $J$  = 6.7, 2.2 Hz, 2H), 7.37 (dq,  $J$  = 8.1, 0.9 Hz, 1H), 7.10 (td,  $J$  = 7.1, 1.2 Hz, 1H), 7.01-6.94 (m, 3H), 6.32 (dd,  $J$  = 2.2, 0.8 Hz, 1H), 5.66 (d,  $J$  = 0.7, 1H), 5.27 (d,  $J$  = 0.8 Hz, 1H), 3.84 (s, 3H);  $^{13}\text{C}$  NMR (75 MHz,  $\text{CDCl}_3$ )  $\delta$  159.7, 141.0, 138.1, 136.3, 132.4, 129.6, 128.6, 122.6, 120.7, 120.0, 113.7, 111.7, 110.7, 103.1, 55.3; APCI  $m/z$  (relative intensity) 250.1 ( $\text{MH}^+$ : 100%); HRMS Calcd for  $\text{C}_{17}\text{H}_{16}\text{NO}$ : 250.1232, Found: 250.1226.

### 2-[1-(3-Methoxy-phenyl)-vinyl]-1H-indole (14l)

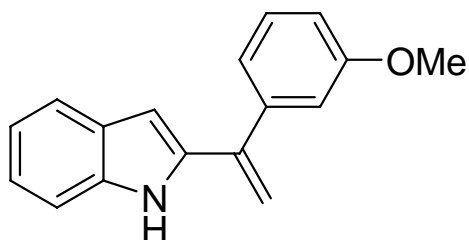

Following representative procedure (6) for crude thermolysis using a reflux time of 4 h and 6%  $\text{Et}_2\text{O}$  in hexanes as chromatography eleuent, propargyl acetate **9a** (81 mg, 0.35 mmol) was treated with 3-methoxyphenylzinc iodide (0.50 M in THF, 1.8 mL, 0.88 mmol) to give the product **14l** as a yellow oil (20 mg, 23%). IR (neat): 3413  $\text{cm}^{-1}$ ;  $^1\text{H}$  NMR (400 MHz,  $(\text{CD}_3)_2\text{CO}$ )  $\delta$  10.40 (br s, 1H), 7.49 (dd,  $J$  = 7.9, 0.8 Hz, 1H), 7.37 (dq,  $J$  = 8.2, 0.8 Hz, 1H), 7.32 (t,  $J$  = 7.9 Hz, 1H), 7.10 (m, 1H), 7.07-7.03 (m, 2H), 7.00-6.96 (m, 2H), 6.35 (dd,  $J$  = 5.1, 0.8 Hz, 1H), 5.76 (s, 1H), 5.34 (s, 1H), 3.82 (s, 3H);  $^{13}\text{C}$  NMR (75 MHz,  $\text{CDCl}_3$ )  $\delta$  159.5, 141.5, 141.4, 137.6, 136.4, 129.4, 128.6, 122.7, 121.0, 120.8,

120.1, 114.0, 113.9, 112.8, 110.8, 103.2, 55.3; ESI  $m/z$  (relative intensity) 250.1 ( $MH^+$ , 100%); HRMS Calcd for  $C_{17}H_{16}NO$ : 250.1232, Found: 250.1230.

**2-[1-(3-Fluoro-phenyl)-vinyl]-1H-indole (14m)**

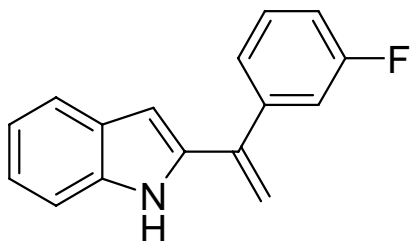

Following representative procedure (**6**) for crude thermolysis, propargyl acetate **9a** (82 mg, 0.36 mmol) was treated with 3-fluorophenylzinc iodide (0.50 M in THF, 1.1 mL, 0.54 mmol) to give compound **14m** (45 mg, 53%) as an orange solid: mp 74 - 75 °C; IR (neat): 3415  $cm^{-1}$ ;  $^1H$  NMR (300 MHz,  $(CD_3)_2CO$ )  $\delta$  10.48 (br s, 1H), 7.52 (d,  $J = 7.9$  Hz, 1H), 7.48-7.33 (m, 3H), 7.26 (d,  $J = 10.2$  Hz, 1H), 7.21-7.11 (m, 2H), 7.01 (t,  $J = 7.5$  Hz, 1H), 6.35 (s, 1H), 5.82 (s, 1H), 5.41 (s, 1H);  $^{13}C$  NMR (75 MHz,  $CDCl_3$ )  $\delta$  162.7 (d,  $J_{CF} = 244.7$  Hz), 142.2 (d,  $J_{CF} = 7.6$  Hz), 140.6 (d,  $J_{CF} = 2.2$  Hz), 137.1, 136.5, 129.8 (d,  $J_{CF} = 8.2$  Hz), 128.5, 124.2 (d,  $J_{CF} = 2.9$  Hz), 122.9, 120.9, 120.2, 115.4 (d,  $J_{CF} = 25.6$  Hz), 115.1 (d,  $J_{CF} = 24.7$  Hz), 113.2, 110.8, 103.7; CI  $m/z$  (relative intensity) 238.0 ( $MH^+$ , 100%); HRMS Calcd for  $C_{16}H_{13}NF$ : 238.1032, Found: 238.1027.

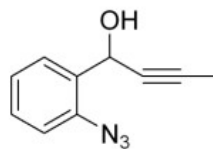

DKHI-43 Grignard Product (lower Rf than S.M., yellow oil)

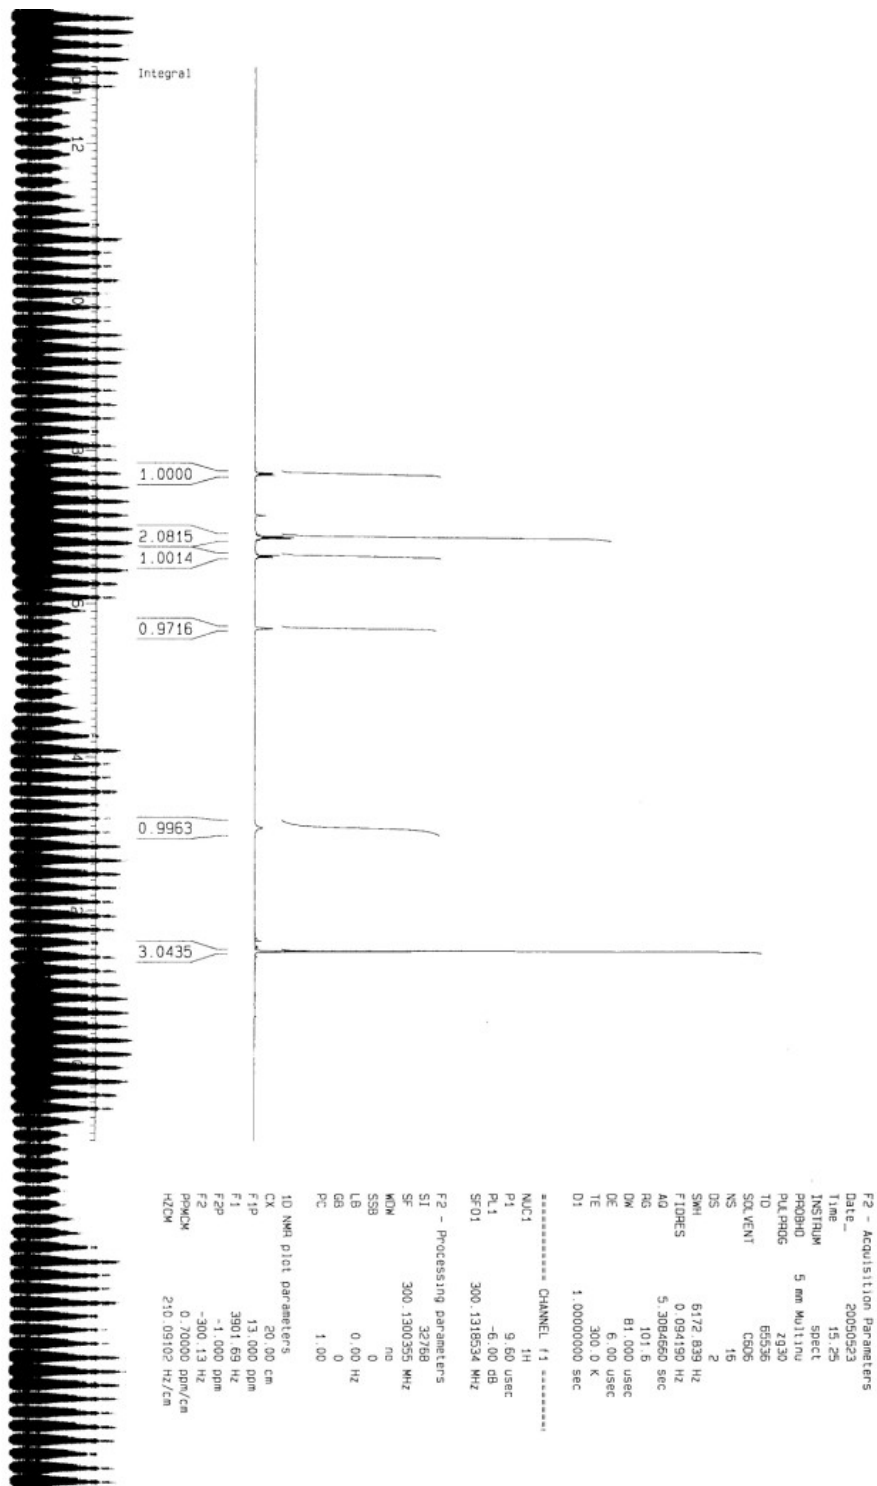

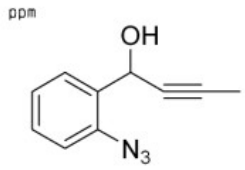

DKM2-43 Yellow 011

- 136.987
- 131.948
- 129.375
- 128.105
- 124.885
- 118.043
- 82.874
- 78.151
- 77.432
- 77.008
- 76.584
- 60.346
- 3.617

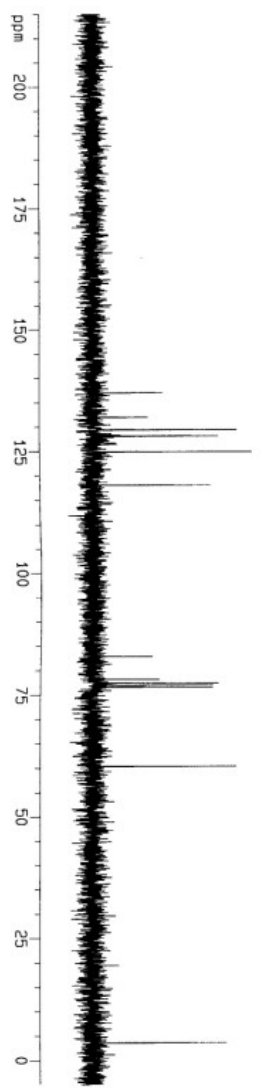

Current Data Parameters  
 NAME DKM2-43Carbon  
 EXPNO 2  
 PROCNO 1

F2 - Acquisition Parameters  
 Date\_ 20050627  
 Time 10:21  
 INSTRUM spect  
 PROBHD 5 mm WJ11nu  
 PULPROG zgpg30  
 TD 65536  
 SOLVENT CDCl3  
 NS 14  
 DS 4  
 SMI 18832.393 Hz  
 FIDRES 0.287360 Hz  
 AQ 1.7600368 sec  
 RG 8192  
 DW 26.556 usec  
 DE 6.00 usec  
 TE 300.0 K  
 D1 2.00000000 sec  
 d11 0.03000000 sec  
 d12 0.00002000 sec

\*\*\*\*\* CHANNEL f1 \*\*\*\*\*  
 NUC1 13C  
 P1 11.80 usec  
 PL1 0.00 dB  
 SF01 75.4760200 MHz

\*\*\*\*\* CHANNEL f2 \*\*\*\*\*  
 CPDPRG2 waltz16  
 NUC2 1H  
 P2 110.00 usec  
 PC202 0.00 dB  
 PL2 0.00 dB  
 PL12 17.30 dB  
 PL13 17.30 dB  
 SF02 300.1312000 MHz

F2 - Processing parameters  
 SI 32768  
 SF 75.4677619 MHz  
 KW 0  
 SSB 0  
 LB 1.00 Hz  
 GB 0  
 PC 1.40

1D NMR plot parameters  
 CX 20.00 cm  
 F1p 215.000 ppm  
 F1 16229.57 Hz  
 F2p -5.000 ppm  
 F2 -377.34 Hz  
 PPM/CX 11.00000 ppm/cm  
 HZ/CX 830.14532 Hz/cm

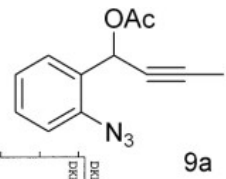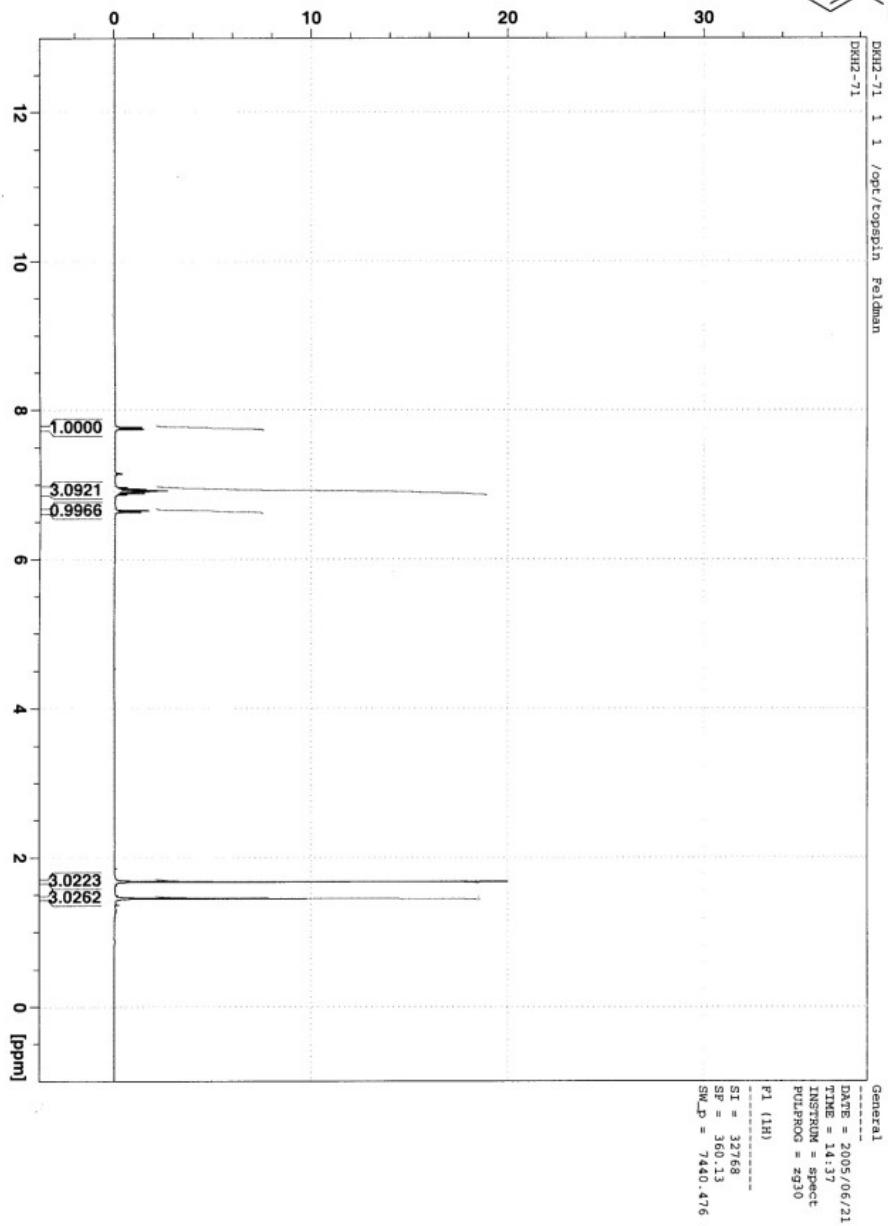

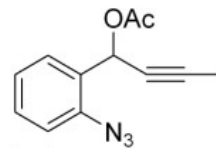

9a

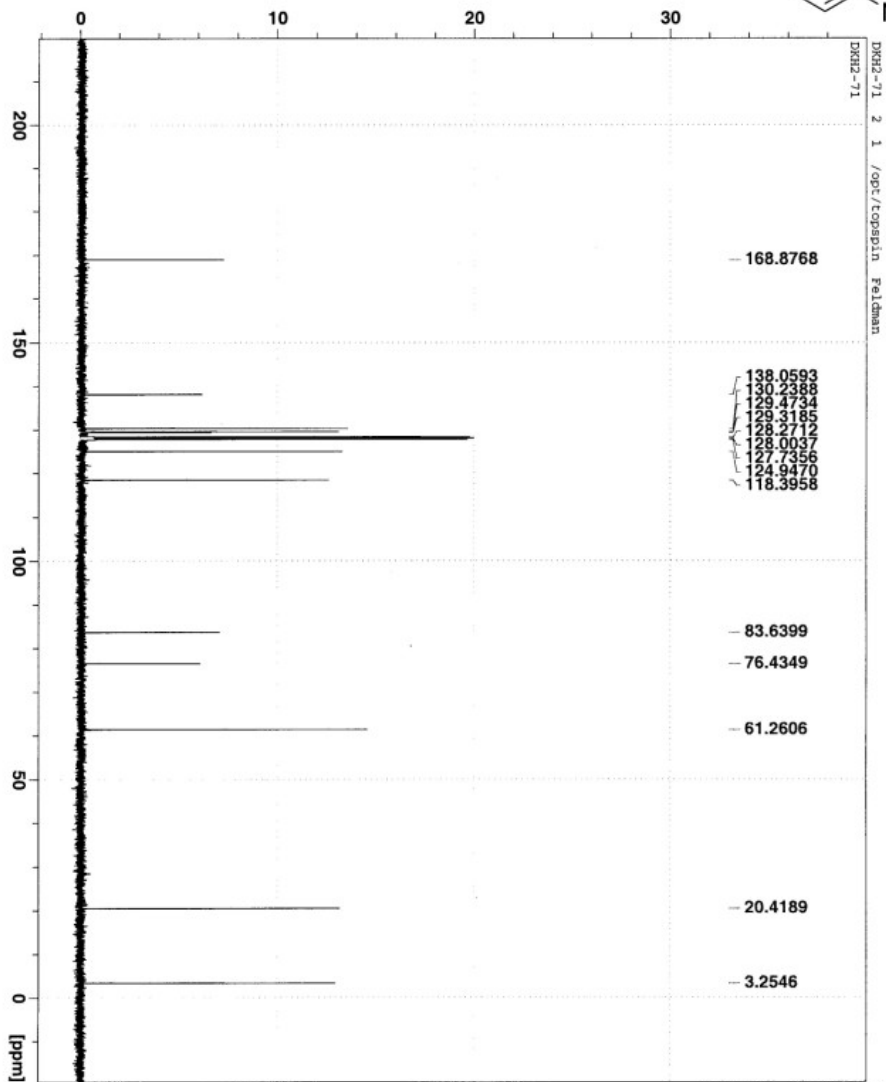

General  
 -----  
 DATE = 2005/06/21  
 TIME = 14:41  
 INSTRUM = spect  
 PULPROG = zgpg30  
 FI (13C)  
 -----  
 SI = 32768  
 SF = 90.555  
 SWH = 21645.022

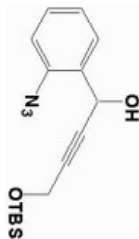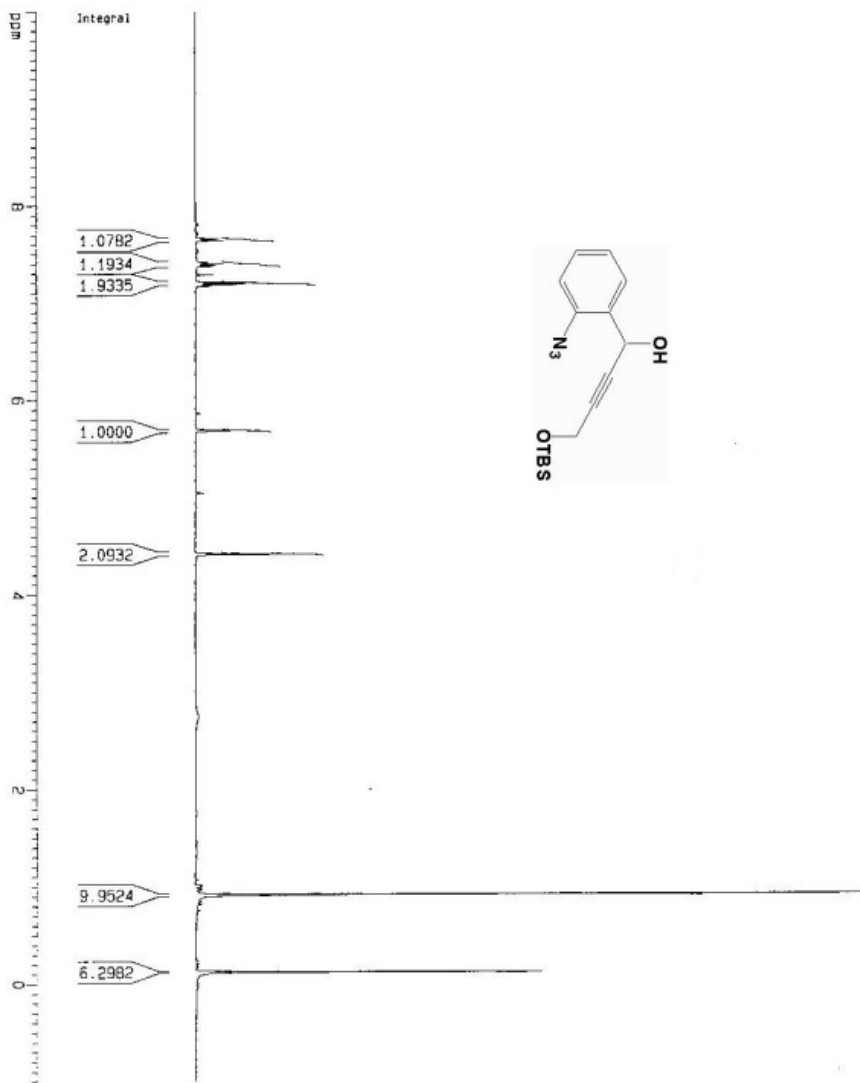

Current Data Parameters  
 NAME: n01-dec-03-05  
 EXPNO: 1  
 PROCNO: 1

F2 - Acquisition Parameters  
 Date\_: 20051203  
 Time: 16.45  
 INSTRUM: spect  
 PROBRD: 5 mm BBI 1H-B  
 PULPROG: zg30  
 TO: 65536  
 SOLVENT: CDCl3  
 NS: 16  
 DS: 2  
 SWH: 8278.148 Hz  
 FIDRES: 0.126314 Hz  
 AQ: 3.9584243 sec  
 RG: 512  
 DM: 50.400 usec  
 DE: 6.00 usec  
 TE: 300.0 K  
 D1: 1.00000000 sec

\*\*\*\*\* CHANNEL f1 \*\*\*\*\*  
 NUC1: 1H  
 P1: 6.43 usec  
 PL1: 0.00 dB  
 SF01: 400.1324710 MHz

F2 - Processing parameters  
 SI: 32768  
 SF: 400.1300000 MHz  
 KW: no  
 SSB: 0  
 LB: 0.00 Hz  
 GB: 0  
 PC: 1.00

10 MHz plot parameters  
 CX: 20.00 cm  
 FIP: 10.000 ppm  
 F1: 4001.30 Hz  
 F2P: -1.040 ppm  
 F2: -400.13 Hz  
 FWHM: 0.55000 ppm/cm  
 HZCM: 200.07150 Hz/cm



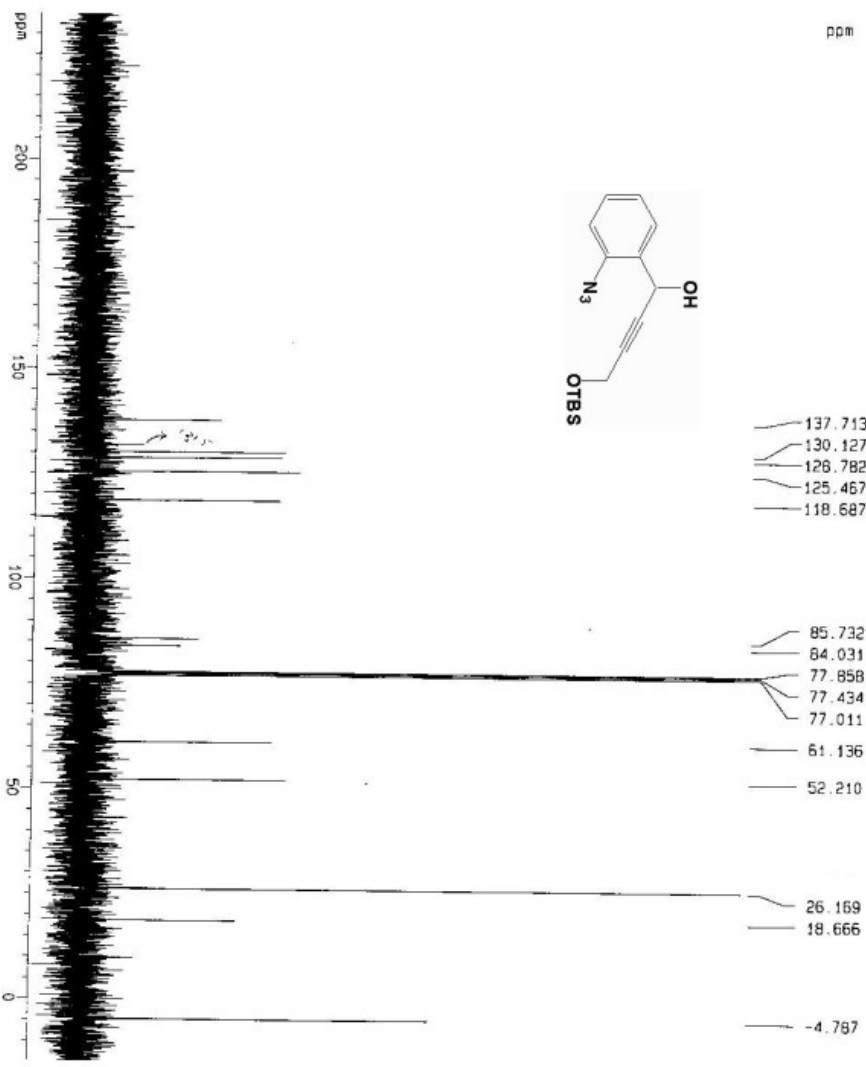

```

Current Data Parameters
NAME      M1-02013-03
EXPNO     3
PROCNO    1

F2 - Acquisition Parameters
Date_     20051203
Time      17:20
INSTRUM   spect
PROBHD    5 mm WALTZ16
PULPROG   zgpg30
TD         65536
SOLVENT   CDCl3
NS         203
DS         4
SMB       16832.393 Hz
FIDRES    0.267260 Hz
AQ         1.740038 sec
RG         16384
DM         28.580 usec
DE         6.00 usec
TE         300.0 K
D1         2.00000000 sec
d11        0.03000000 sec
d12        0.00002000 sec

***** CHANNEL f1 *****
NUC1       13C
P1         11.80 usec
PL1        0.00 dB
SFO1       75.4763000 MHz

***** CHANNEL f2 *****
DPRGR2    waltz16
NUC2       1H
P2         110.00 usec
PL2        0.00 dB
PC2        0.00 dB
P12        17.50 dB
P13        17.50 dB
SFO2       300.1350000 MHz

F2 - Processing parameters
SI         32768
SF         75.4671990 MHz
WDW        EM
SSB         0
LB         1.00 Hz
GB         0
PC         1.40

1D NMR Plot Parameters
CX         20.00 cm
F1P        234.789 dB
F1         13717.15 Hz
F2P        -20.000 dB
F2         -1509.35 Hz
PRINCM    12.7383 dB/cm
HYDN       S61.30550 Hz/cm

```

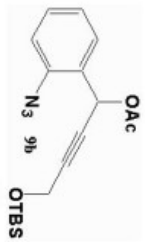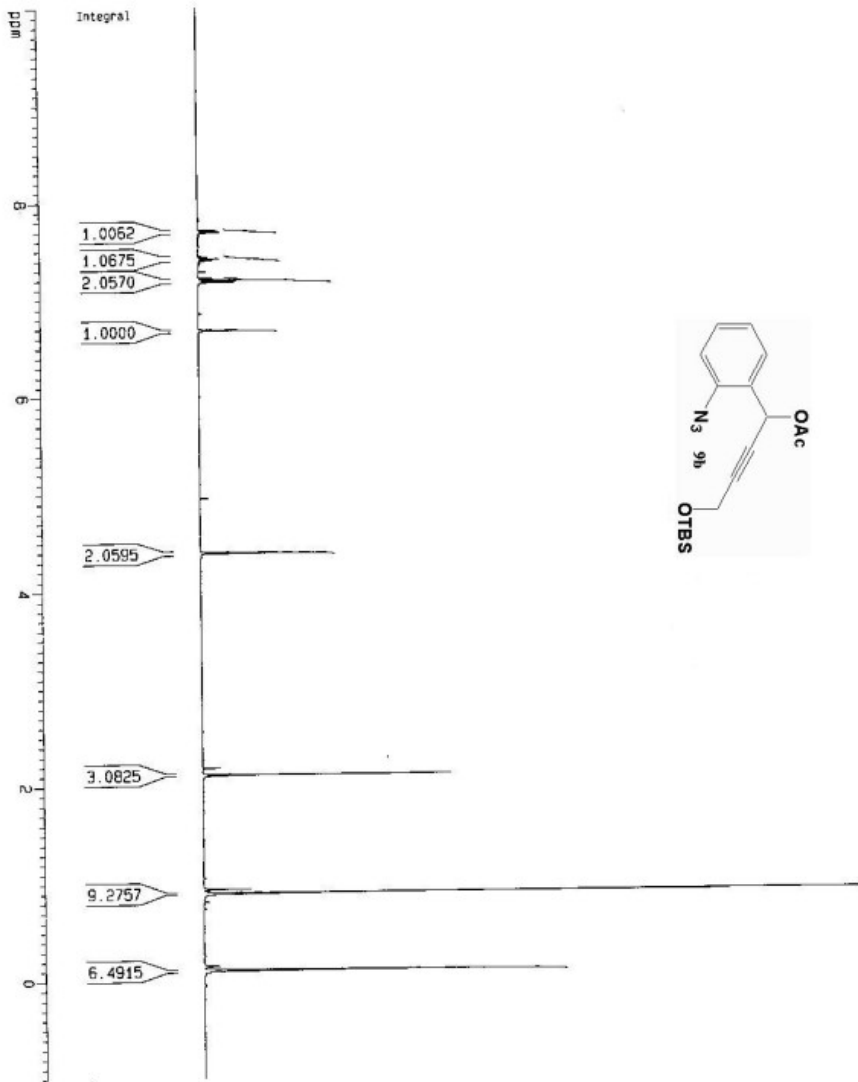

Current Data Parameters  
 NAME HRI-DEC05-05  
 EXPNO 1  
 PROCNO 1

F2 - Acquisition Parameters  
 Date\_ 20051205  
 Time 11:46  
 INSTRUM spect  
 PROBR0 5 mm BBI 1H-B  
 PULPROG zg30  
 TD 65536  
 SOLVENT DMS-D3  
 NS 16  
 DS 2  
 SFO1 8270.148 Hz  
 FIDRES 0.18014 Hz  
 AQ 3.598423 sec  
 RG 256  
 DM 60.400 usec  
 DE 6.00 usec  
 TE 300.0 K  
 D1 1.00000000 sec

----- CHANNEL f1 -----  
 NUC1 31P  
 P1 6.45 usec  
 PL1 0.00 dB  
 SFO1 400.1324710 MHz

F2 - Processing parameters  
 SI 32768  
 SF 400.1300000 MHz  
 KW no  
 SSB 0  
 LB 0.00 Hz  
 GB 0  
 PC 1.00

10 NMR plot parameters  
 CX 20.00 cm  
 FIP 10.000 DPM  
 F1 4001.30 Hz  
 F2P -1.000 ppm  
 F2 -400.13 MHz  
 PPM0H 0.55000 ppm/cm  
 HZCM 220.07150 Hz/cm

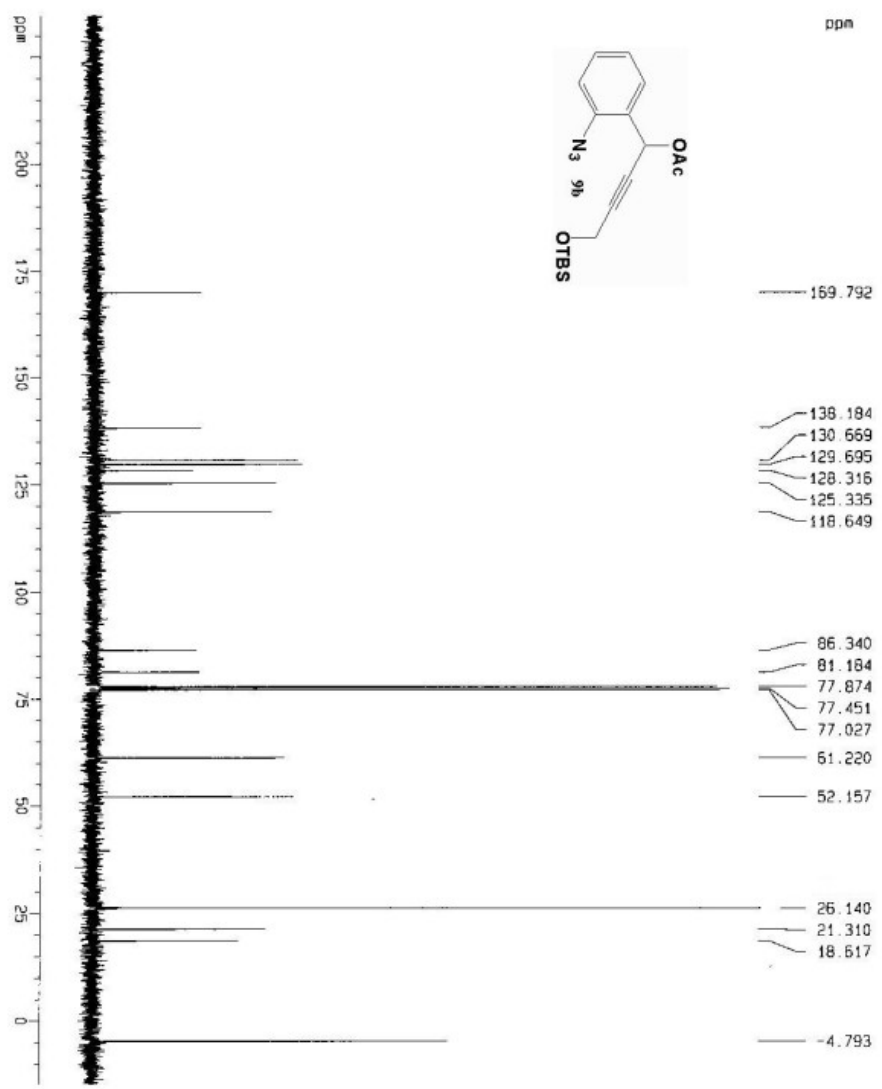

ppm

|         |
|---------|
| 169.792 |
| 138.184 |
| 130.669 |
| 129.695 |
| 128.316 |
| 125.335 |
| 118.649 |
| 86.340  |
| 81.184  |
| 77.874  |
| 77.451  |
| 77.027  |
| 61.220  |
| 52.157  |
| 26.140  |
| 21.310  |
| 18.617  |
| -4.793  |

```

Current Data Parameters
NAME      MR1-DEC03-05
EXPNO    2
PROCNO   1
-----
F2 - Acquisition Parameters
Date_    20051203
Time     18.46
INSTRUM  spect
PROBHD   5 mm Nu1190
PULPROG  zgpg30
TD        65536
SOLVENT  CDCl3
NS        417
DS        4
SFO1     100.62 303.36 Hz
FIDRES   0.287360 Hz
AQ        1.7400308 sec
RG         11596.2
DM        28.550 usec
DE         6.00 usec
TE        300.0 K
D1         2.00000000 sec
d12        0.03000000 sec
d122       0.00020000 sec
-----
***** CHANNEL f1 *****
NUC1      13C
P1         11.90 usec
PL1        0.00 dB
SFO1      75.4702000 MHz
-----
***** CHANNEL f2 *****
OPPRG2    waltz16
NUC2       1H
PCPD2     110.00 usec
RG2        0.00 dB
PL2        17.50 dB
PL12       17.50 dB
SFO2      300.1312005 MHz
-----
F2 - Processing parameters
SI         32768
SF         75.4677190 MHz
WDW        EM
SSB        0
LB         1.00 Hz
GB         0
PC         1.40
-----
10 NMR p101 parameters
CX         20.00 cm
F1P        234.765 ppm
F1         17217.15 Hz
F2P        -14.778 ppm
F2         -1115.24 Hz
PUNCH     12.47732 DDP/CA
HZCM      941.61951 HZ/CA

```

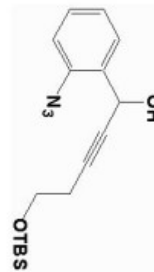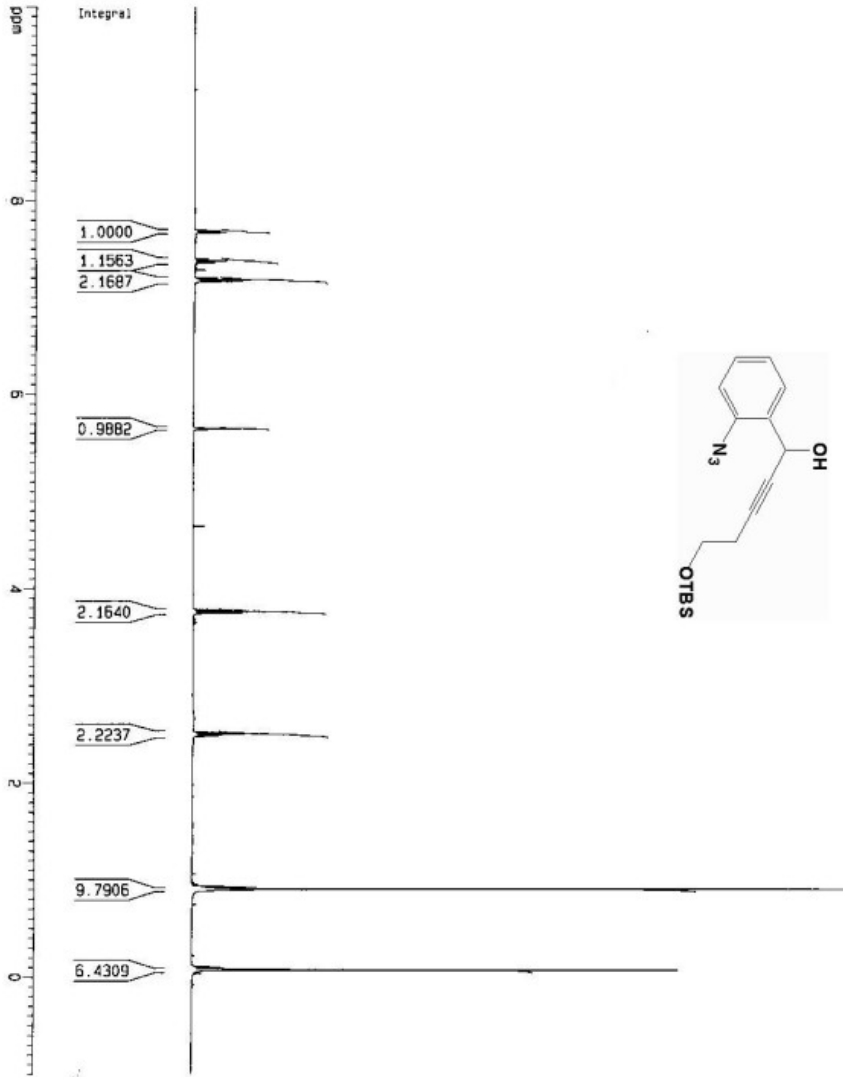

Current Data Parameters  
 NAME MRI-Aug05-06  
 EXPNO 2  
 PROCNO 1

F2 - Acquisition Parameters  
 Date\_ 20050905  
 Time 9:48  
 INSTRUM spect  
 PULPROG 5 ms 891 Tr-B  
 PROBHD 2830  
 PULPROG 2830  
 TD 65536  
 SOLVENT CDCl3  
 NS 16  
 DS 2  
 SFO 82718.146 Hz  
 FIDRES 0.126314 Hz  
 AQ 3.9584243 sec  
 RG 35.9  
 DW 50.400 usec  
 DE 5.00 usec  
 TE 300.0 K  
 D1 1.00000000 sec

\*\*\*\*\* CHANNEL f1 \*\*\*\*\*  
 NUC1 1H  
 P1 14  
 PL1 6.43 usec  
 PL1 0.00 dB  
 SF 400.1324710 MHz

F2 - Processing parameters  
 SI 32768  
 SF 400.1300000 MHz  
 MDW no  
 SSB 0  
 LB 0.00 Hz  
 GB 0  
 PC 1.00

1D NMR p1d1 parameters:  
 CX 50.00 cm  
 F1P 10.000 ppm  
 F1 4001.30 Hz  
 F2P -1.000 ppm  
 F2 -400.13 Hz  
 PRPCH 0.55000 ppm/cm  
 HZCH 250.07150 Hz/cm

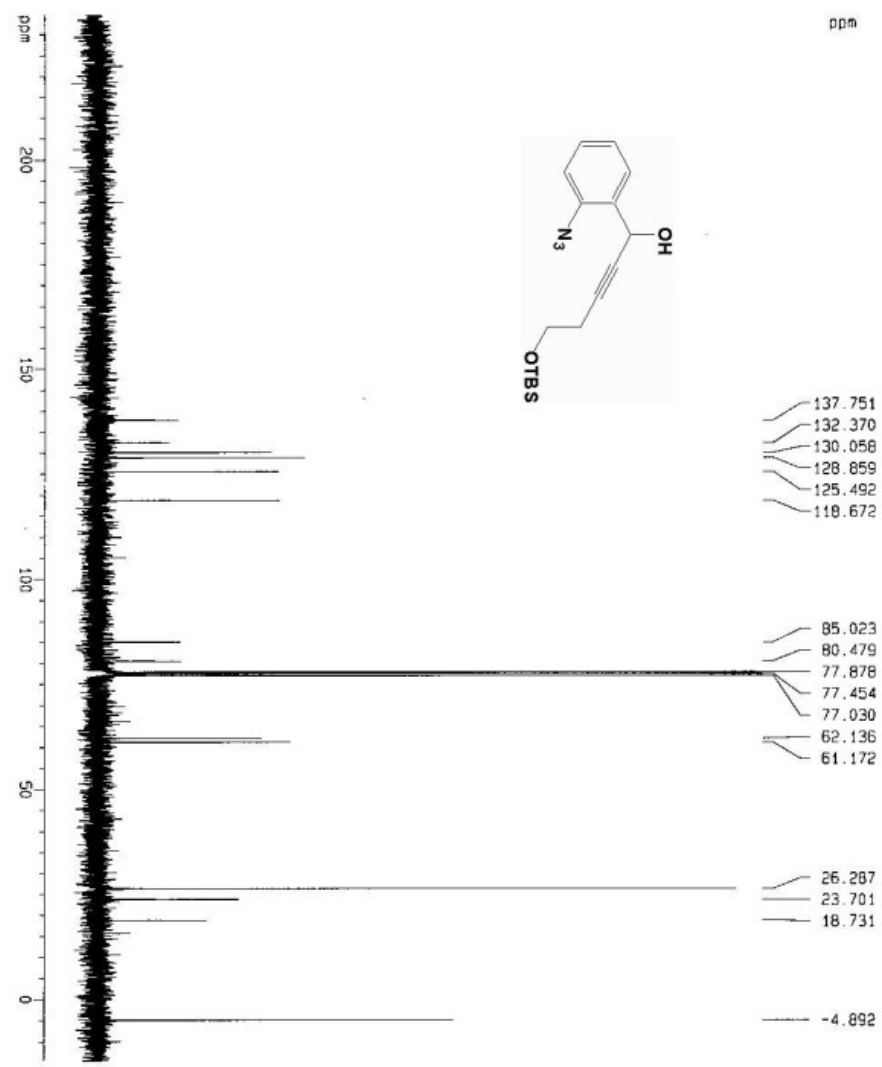

```

Current Data Parameters
NAME      MFL-06c03-05
EXPNO    1
PROCNO   1

F2 - Acquisition Parameters
Date_     20051203
Time      17.44
INSTRUM   spect
PROBHD    5 mm QNP 1H/1
PULPROG   zgpg30
TD         65536
SOLVENT   CDCl3
NS         147
DS         4
SWH        18796.982 MHz
FIDRES     0.298619 Hz
AQ         1.7443076 sec
RG         325
DE         20.600 usec
TE         300.0 K
D1         2.00000000 sec
D11        0.03000000 sec
D12        0.00000000 sec

***** CHANNEL f1 *****
NUC1       13C
P1         5.40 usec
PL1        -9.00 dB
SFO1       75.470327 MHz

***** CHANNEL f2 *****
CPDPRG2    MZL145
NUC2       1H
P2         115.00 usec
PL2        0.00 dB
SFO2       299.871595 MHz

F2 - Processing parameters
SI         32768
SF         75.4023410 MHz
WDW        EM
SSB        0
LB         1.00 Hz
GB         0
PC         1.40

1D NMR Plot Parameters
CX         20.00 cm
F1P        234.551 ppm
F1         17693.24 Hz
F2P        -20.000 ppm
F2         -1508.05 Hz
AQ         12.73255 sec/cm
HZCM       560.06451 Hz/cm
  
```

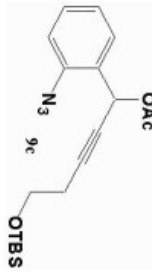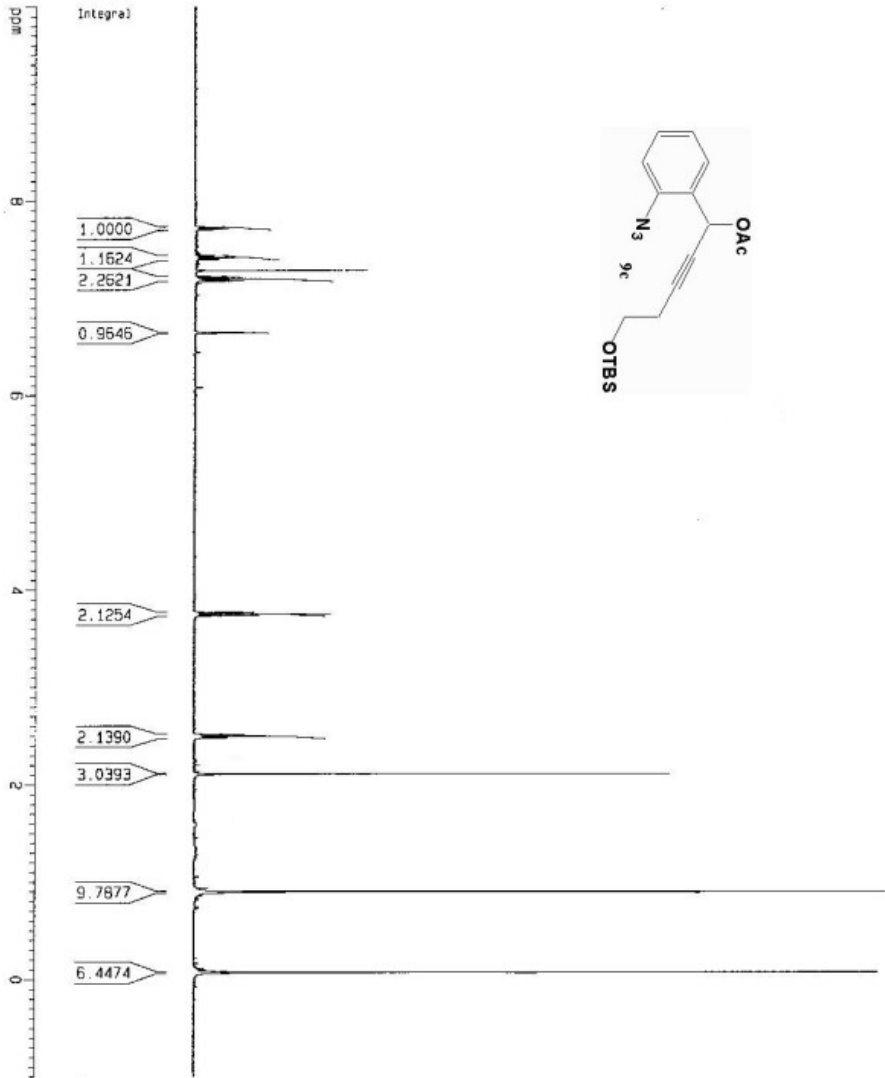

Current Data Parameters  
 NAME: M01-06c03-05  
 EXPNO: 2  
 PROCNO: 1

F2 - Acquisition Parameters

Date\_: 20051203  
 Time: 16.51  
 INSTRUM: spect  
 PROBRD: 5 mm BBT 1H-5  
 PULPROG: zgpg30  
 TD: 65536  
 SOLVENT: CDCl3  
 NS: 2  
 DS: 2  
 SWH: 8278.146 Hz  
 FIDRES: 0.128314 Hz  
 AQ: 3.5984243 sec  
 RG: 1624.6  
 DM: 50.400 USEC  
 DE: 5.00 USEC  
 TE: 300.0 K  
 D1: 1.00000000 sec

----- CHANNEL f1 -----  
 NUC1: 1H  
 P1: 6.45 USEC  
 PL1: 0.00 DB  
 SFO1: 400.1326710 MHz

F2 - Processing parameters

SF: 400.1300000 MHz  
 SW: 32768  
 MW: 0  
 SSB: 0  
 LB: 0.00 Hz  
 GB: 0  
 PC: 1.00

1D NMR plot parameters

CX: 20.00 cm  
 F1P: 10.000 ppm  
 F1: 4001.30 Hz  
 F2P: -1.000 ppm  
 F2: -400.13 Hz  
 SFOCK: 0.55000 ppm/cm  
 HZCK: 220.07150 Hz/cm

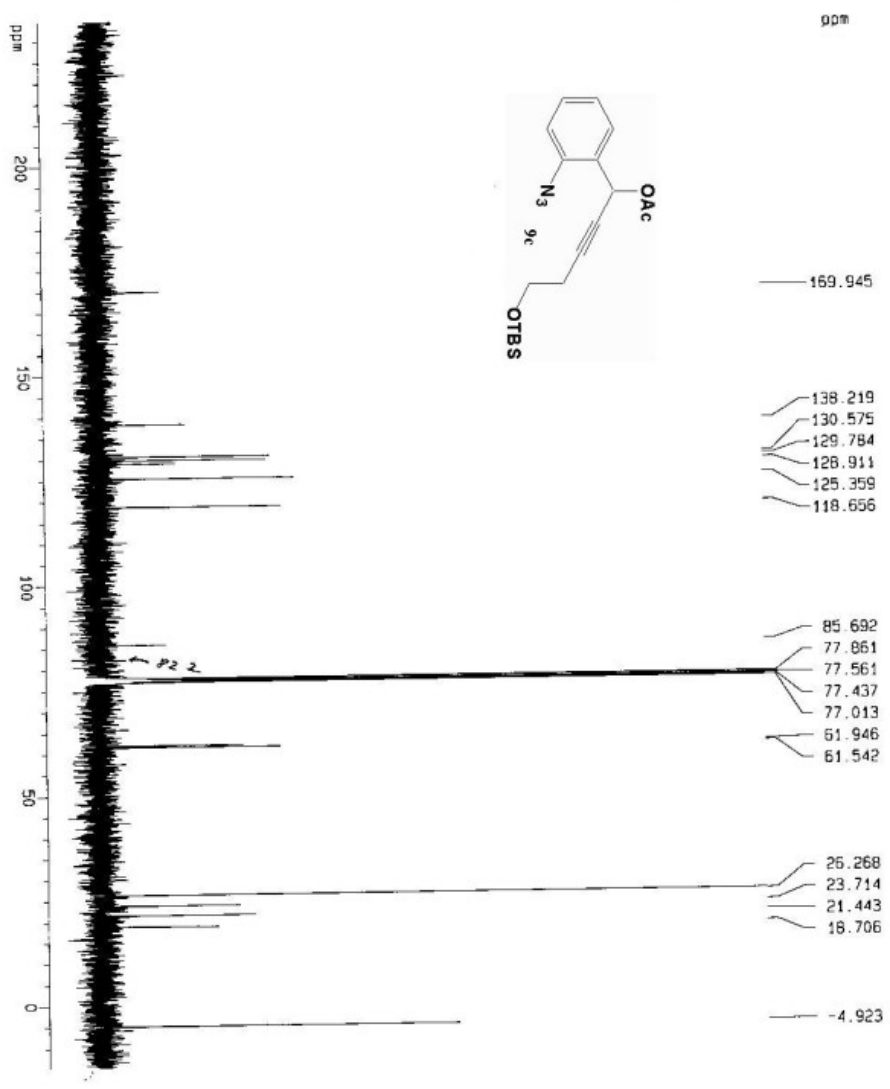

```

Current Data Parameters
NAME      N11-Dec03-05
EXPNO    3
PROCNO   1

F2 - Acquisition Parameters
Date_    20051203
Time     19.28
INSTRUM spect
PROBHD   5 mm QNP 1H/1
PULPROG zgpg30
TD        65535
SOLVENT  CDCl3
NS        1329
DS         4
SWH       18796.982 Hz
FIDRES    0.288819 Hz
AQ         1.743076 sec
RG         1024
DM         26.800 uvert
DE         6.00 uvert
TE         300.0 K
D1         2.00000000 sec
D11        0.07000000 sec
D12        0.00000000 sec

***** CHANNEL f1 *****
NUC1       13C
P1         5.40 uvert
PL1        -6.00 dB
SFO1       75.410927 MHz

***** CHANNEL f2 *****
CPDPRG2   waltz16
NUC2       1H
P2         115.00 uvert
PL2        0.00 dB
PL12       20.00 dB
PL13       20.00 dB
SFO2       259.8711995 MHz

F2 - Processing parameters
SI         32768
SF         75.4073410 MHz
WDW        EM
SSB         0
LB          1.00 Hz
GB          0
PC          1.40

1D NMR plot parameters
CX         20.08 cm
F1p        234.651 Dppm
F1         17693.24 Hz
F2p        -20.000 Dppm
F2         -1569.05 Hz
PCMCN     12.73266 Dppm/cm
HZCM      980.08451 Hz/cm

```

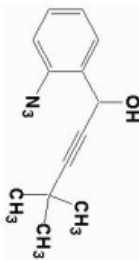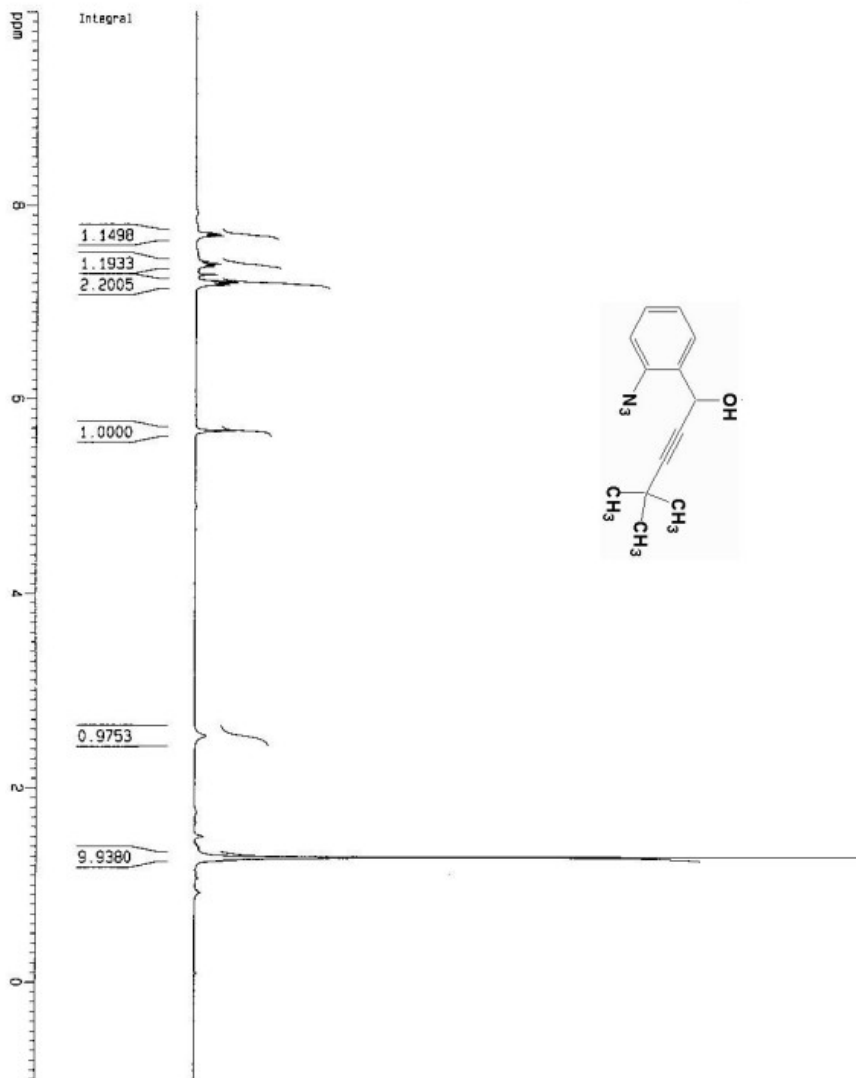

Current Data Parameters  
 NAME M1-AP19-06  
 EXPNO 4  
 PROCNO 1

F2 - Acquisition Parameters  
 Date\_ 20060419  
 Time 14:57

INSTRUM spect  
 PULPROG zgpg30  
 TD 65536  
 SOLVENT CDCl3  
 NS 16  
 DS 2

SI 6172.839 Hz  
 FIDRES 0.094190 Hz  
 AQ 5.3994660 sec  
 RG 362  
 DM 81.000 usec  
 DE 6.00 usec  
 TE 300.0 K  
 D1 1.00000000 sec

\*\*\*\*\* CHANNEL f1 \*\*\*\*\*  
 NUC1 1H  
 P1 9.80 usec  
 PL1 -6.00 dB  
 SFO1 300.1318534 MHz

F2 - Processing parameters  
 SI 32768  
 SF 300.1300000 MHz  
 MM 0  
 SSB 0  
 LB 0.00 Hz  
 GB 0  
 PC 1.00

3D NMR plot parameters  
 CX 20.00 cm  
 F1P 10.000 ppm  
 F1 3001.30 Hz  
 F2P -1.000 ppm  
 F2 -300.13 Hz  
 PRGCM 0.55000 ppm/cm  
 HZCM 165.07150 Hz/cm



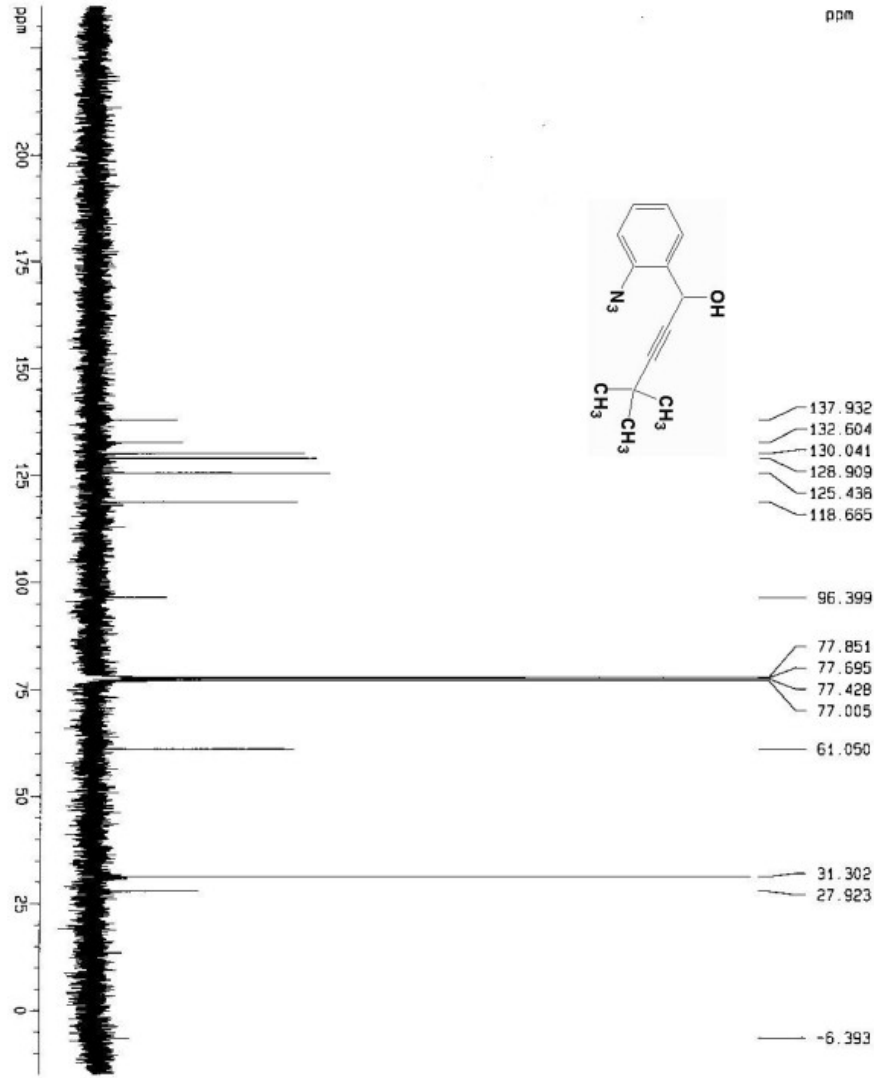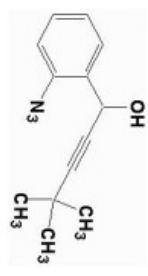

- 137.932
- 132.604
- 130.041
- 128.909
- 125.438
- 118.665
- 96.399
- 77.851
- 77.695
- 77.428
- 77.005
- 61.050
- 31.302
- 27.923
- 9.393

```

Current Data Parameters
NAME      M1-APR19-08
EXPNO     5
PROCNO    1
-----
F2 - Acquisition Parameters
Date_     20080418
Time      15:04
INSTRUM   spect
PROBHD    5 mm W111nu
PULPROG   zgpg30
TD         65536
SOLVENT   CDCl3
NS         311
DS         4
SWH        18682.393 Hz
FIDRES     0.287350 Hz
AQ         1.7400308 sec
RG         11585.2
CW         26.500 usec
DE         6.00 usec
TE         300.0 K
D1         2.00000000 sec
d11        0.03000000 sec
d12        0.00020000 sec
-----
***** CHANNEL f1 *****
NUC1       13C
P1         11.60 usec
PL1        0.00 dB
SFO1       75.4760000 MHz
-----
***** CHANNEL f2 *****
CPDPRG2    waltz16
NUC2       1H
P2         110.00 usec
PL2        0.00 dB
PL12       17.50 dB
PL13       17.50 dB
SFO2       300.1312005 MHz
-----
F2 - Processing parameters
SI         32768
SF         75.4677190 MHz
AQ         1.7400308 sec
WDW        EM
SSB        0
LB         1.00 Hz
GB         0
PC         1.40
-----
1D NMR plot parameters
CX         20.00 cm
F1P        234.705 ppm
F1         12717.16 Hz
F2P        -14.778 ppm
F2         -1119.23 Hz
FIDRES     12.47715 ppm/cm
HZCM       941.61951 Hz/cm

```

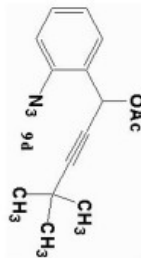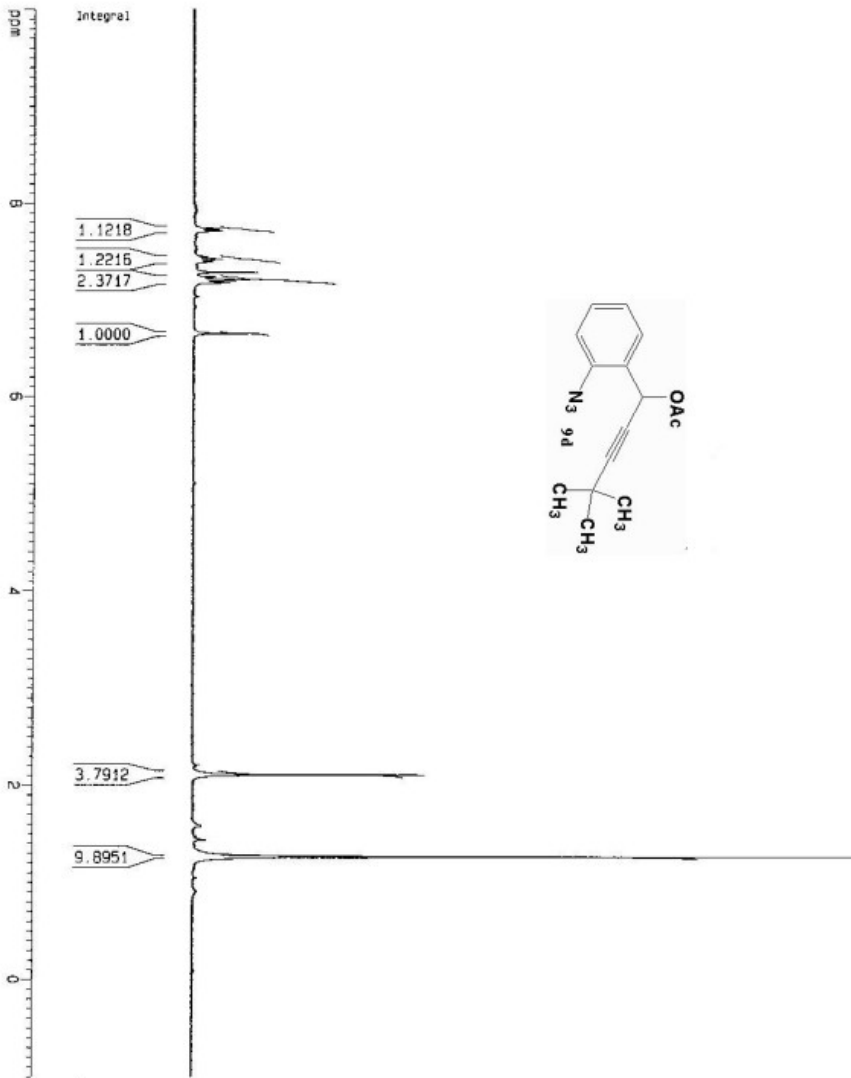

Current Data Parameters  
 NAME M1-Apr20-06  
 EXPNO 2  
 PROCNO 1

F2 - Acquisition Parameters

Date\_ 20050420  
 Time 16.09  
 INSTRUM spect  
 PROBRD 5 mm MUltinu  
 PULPROG zgpg30  
 TD 65536  
 SOLVENT CDCl3  
 NS 16  
 DS 2  
 SMH 6172.833 Hz  
 FIDRES 0.094190 Hz  
 AQ 5.3084660 sec  
 RG 512  
 DM 81.000 usec  
 DE 6.00 usec  
 TE 300.0 K  
 D1 1.00000000 sec

\*\*\*\*\* CHANNEL f1 \*\*\*\*\*

NUC1 1H  
 P1 9.60 usec  
 PL1 -8.00 dB  
 SFO1 300.1318534 MHz

F2 - Processing parameters

SF 32768  
 SF 300.1300000 MHz  
 MDW no  
 SSB 0  
 LB 0.00 Hz  
 GB 0  
 PC 1.00

1D NMR plot parameters

CX 20.00 cm  
 F1P 10.000 ppm  
 F1 3001.30 Hz  
 F2P -1.000 ppm  
 F2 -300.13 Hz  
 PPM/CM 0.550000 ppm/cm  
 HZ/CM 165.07150 Hz/cm

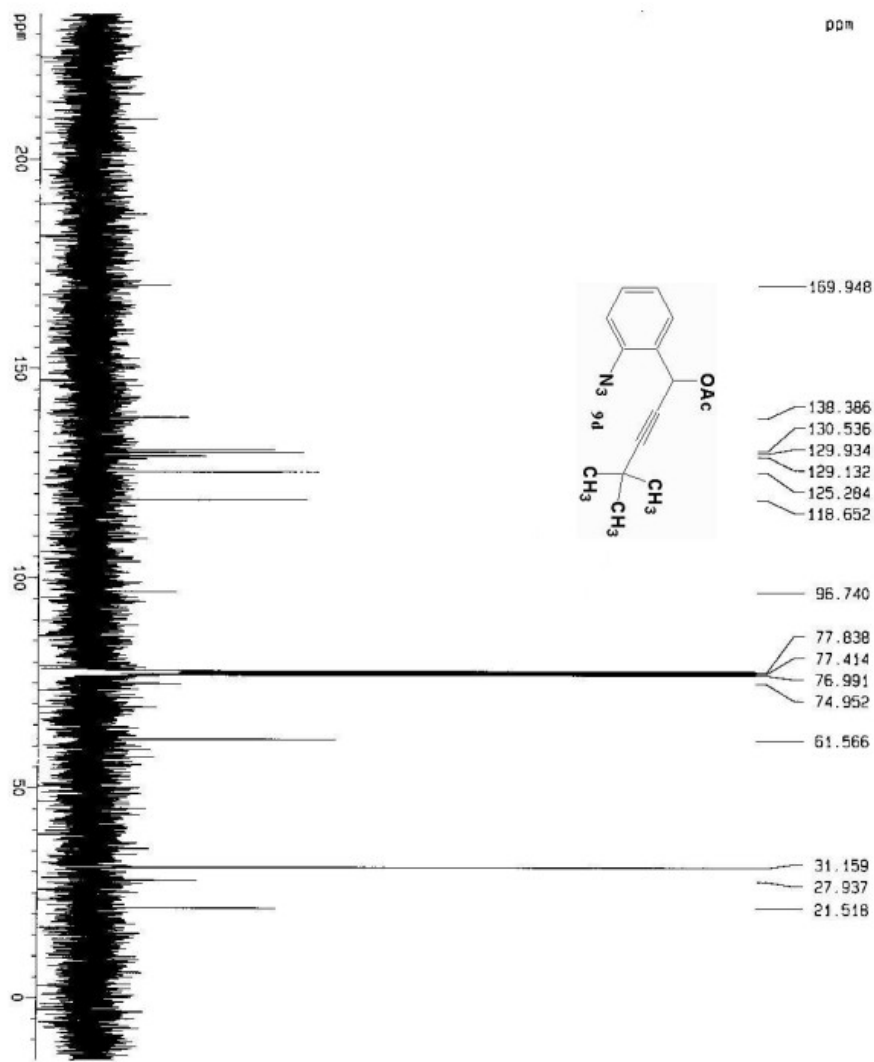

Current Data Parameters  
 NAME W1-Apr20-06  
 EXPNO 3  
 PROCNO 1

F2 - Acquisition Parameters  
 Date\_ 20060420  
 Time 16:24  
 INSTRUM spect  
 PULPROG 5 pm Multivp  
 FIDRES 2.99430  
 T0 65536  
 SOLVENT CDCl3  
 NS 769  
 DS 4  
 SWH 18832.309 Hz  
 FIDRES 0.282706 Hz  
 AQ 1.7460008 sec  
 RG 13004  
 DN 26.350 usec  
 DE 6.00 usec  
 TE 300.0 K  
 D1 2.00000000 sec  
 d11 0.03000000 sec  
 d12 0.00012000 sec

\*\*\*\*\* CHANNEL f1 \*\*\*\*\*  
 NUC1 13C  
 P1 11.80 usec  
 PL1 0.00 dB  
 SFO1 75.4750200 MHz

\*\*\*\*\* CHANNEL f2 \*\*\*\*\*  
 CPDPRG2 waltz16  
 NUC2 1H  
 PCPD2 110.00 usec  
 PL2 0.00 dB  
 PL12 17.50 dB  
 PL13 17.50 dB  
 SFO2 300.1312000 MHz

F2 - Processing parameters  
 S1 32768  
 SF 75.4677150 MHz  
 KW EM  
 SSB 0  
 LB 1.00 Hz  
 DB 0  
 PC 1.40

ID NMR plot parameters  
 CS 20.00 cm  
 CP 234.769 ppm  
 F1 17.173 Hz  
 F2 -150.000 ppm  
 PPMCH 12.73893 Hz/cm  
 HZCH 961.32544 Hz/cm

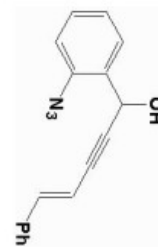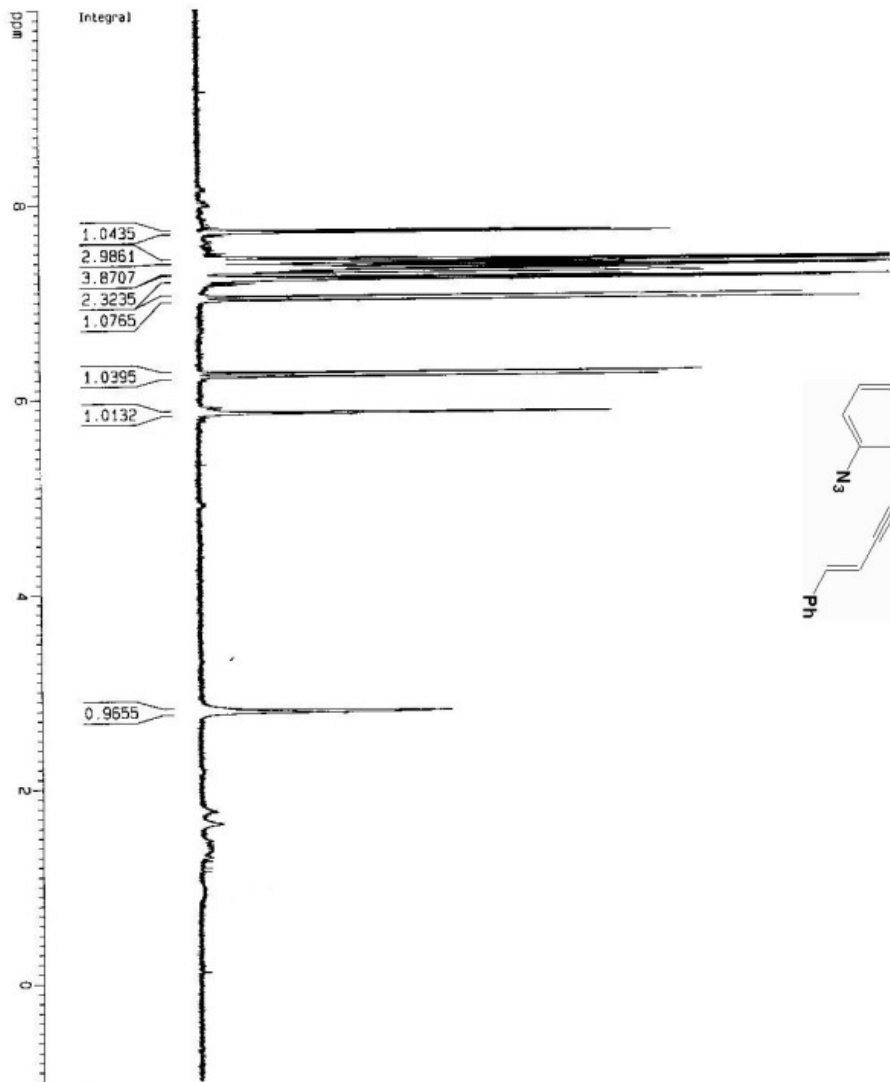

Current Data Parameters  
 NAME M01-08C03-05  
 EXPNO 3  
 PRGNAME 1  
 F2 - Acquisition Parameters  
 Date\_ 20051205  
 Time 12.01  
 INSTRUM spect  
 PROCNO 5  
 PULPROG zgpg30  
 TD 4930  
 FIDRES 0.5556  
 SOLVENT CDCl3  
 NS 12  
 DS 2  
 SWH 8278.145 Hz  
 FIDRES 0.18514 Hz  
 AQ 3.595443 sec  
 RG 812.7  
 DM 60.400 usec  
 DE 6.00 usec  
 TE 300.0 K  
 D1 1.00000000 sec

\*\*\*\*\* CHANNEL f1 \*\*\*\*\*  
 NUC1 1H  
 P1 6.45 usec  
 PL1 0.00 dB  
 SF01 400.1364710 MHz

F2 - Processing parameters  
 SI 32768  
 SF 400.1300000 MHz  
 KW no  
 SSB 0  
 LB 0.00 Hz  
 GB 0  
 PC 1.00

10 NMR list parameters  
 CX 20.00 cm  
 F1P 10.000 ppm  
 F1 4001.30 Hz  
 F2P -1.000 ppm  
 F2 -400.13 Hz  
 GPMCH 0.55000 ppm/cm  
 KZCH 220.07150 Hz/cm

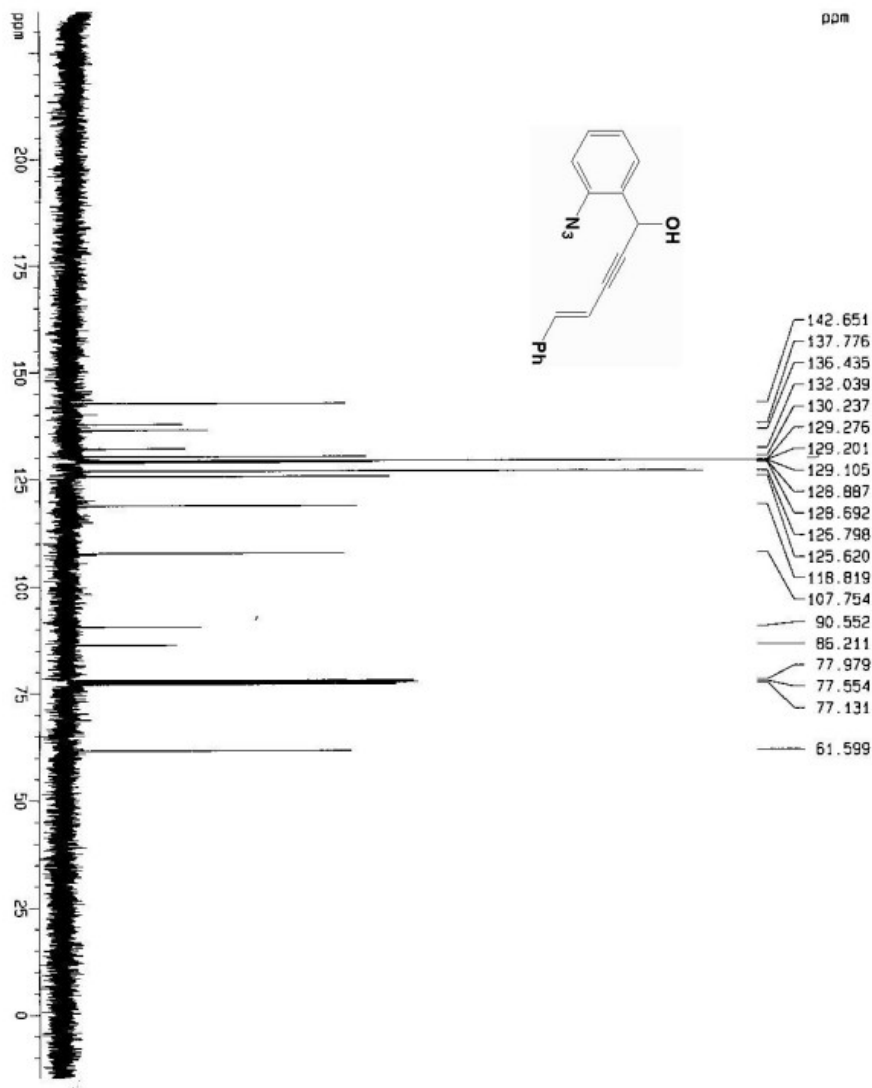

```

Current Data Parameters
NAME          N01-Sept13-05
EXPNO         4
PROCNO       1
PROCNAME     1

F2 - Acquisition Parameters
Date_        20050919
Time         17.13
INSTRUM     spect
PROBHD      5 mm DNP 1H/1
PULPROG     zgpg30
TD           65536
SOLVENT     CDCl3
NS           37
DS           4
SWH          18798.992 Hz
FIDRES      0.286819 Hz
AQ           1.7433076 sec
RG           1024
DE           28.800 umic
TE           300.0 K
D0           2.00000000 sec
O1           0.03000000 sec
O12          0.00000000 sec

***** CHANNEL f1 *****
NUC1         13C
P1           5.00 umic
PL1          -8.00 dB
SFO1         75.4108307 MHz

***** CHANNEL f2 *****
COPROG2     waltz16
NUC2         1H
P2           115.00 umic
PL2          0.00 dB
PL12         20.00 dB
PL13         20.00 dB
SFO2         299.8711995 MHz

F2 - Processing parameters
SI           32768
SF           75.4023410 MHz
WDW          EM
SSB          0
LB           1.00 Hz
GB           0
PC           1.40

10 NMR plot parameters
CK           20.00 cm
F1P          234.651 ppm
F1           17593.24 Hz
F2P          -14.038 ppm
F2           -1103.75 Hz
PROCKM      12.40446 Deg/Ce
HZCKM       939.84987 Hz/Ce
  
```

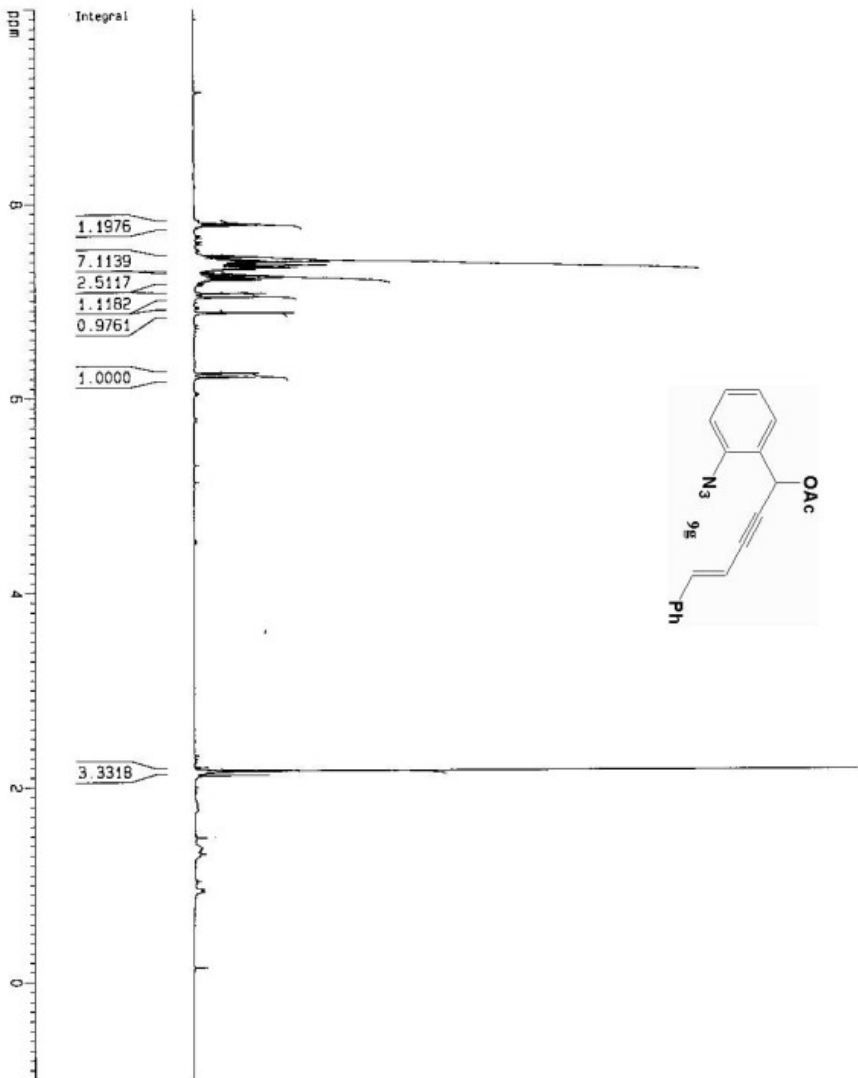

Current Data Parameters  
 NAME W1-Nov10-05  
 EXPNO 1  
 PROCNO 1

F2 - Acquisition Parameters  
 Date\_ 20051110  
 Time 10.10  
 INSTRUM spect  
 PROBR0 5 mm BBI 1H-6  
 PULPROG zgpg30  
 TO 85336  
 SOLVENT CDCl3  
 NS 7  
 DS 2  
 SWH 8278.146 Hz  
 FIDRES 0.126314 Hz  
 AQ 3.5944243 sec  
 RG 181  
 DM 60.400 usec  
 DE 6.00 usec  
 TE 300.0 K  
 D1 1.00000000 sec

----- CHANNEL f1 -----  
 NUC1 1H  
 P1 6.45 usec  
 PL1 0.00 dB  
 SF01 400.1324710 MHz

F2 - Processing parameters  
 SI 32768  
 SF 400.1300000 MHz  
 KCM no  
 SSB 0  
 LB 0.00 Hz  
 GB 0  
 PC 1.00

10 MHz plot parameters  
 CX 20.00 cm  
 F1 10.000 GHz  
 F2 4001.30 Hz  
 F3 -1.000 GHz  
 F4 -400.13 Hz  
 PPMCM 0.55000 ppm/cm  
 HZCM 250.07150 Hz/cm

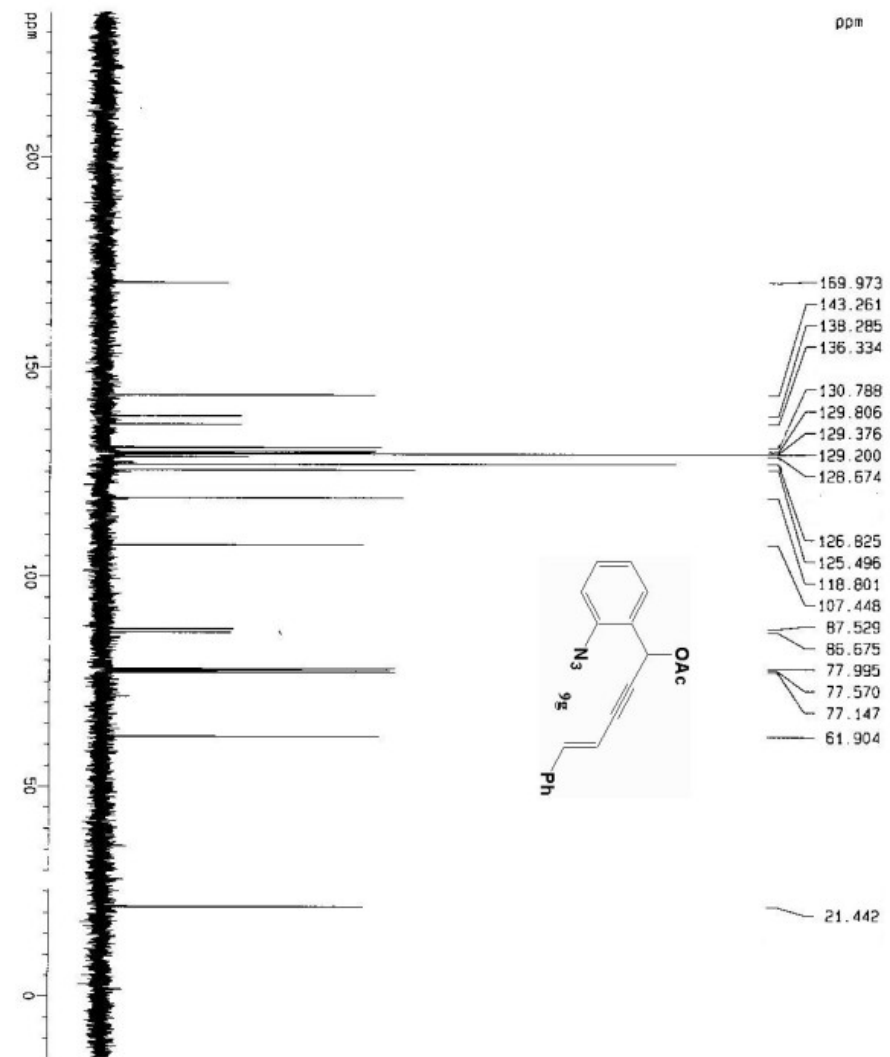

- 169.973
- 143.261
- 138.285
- 136.334
- 130.788
- 129.806
- 129.376
- 129.200
- 128.674
- 126.825
- 125.496
- 118.801
- 107.448
- 87.529
- 86.675
- 77.995
- 77.570
- 77.147
- 61.904
- 21.442

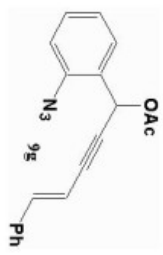

```

Current Data Parameters
NAME      W1-MW1F-05
EXPNO    2
PROCNO   1

F2 - Acquisition Parameters
Date_    20051110
Time     10:22
INSTRUM  spect
PROBHD   5 mm QNP 1H/1
PULPROG  zgpg30
TD        65536
SOLVENT  CDCl3
NS        31
DS        4
SWH       18736.899 Hz
FIDRES    0.286813 Hz
AQ         1.7233075 sec
RG         512
AQ         26.600 usec
DE         6.00 usec
TE         300.0 K
D1         2.00000000 sec
D11        0.03000000 sec
D12        0.00020000 sec

----- CHANNEL f1 -----
NUC1      13C
P1         5.40 usec
PL1       -6.00 dB
SFO1      75.476327 MHz

----- CHANNEL f2 -----
CPDPRG2   waltz16
NUC2      1H
P2         115.00 usec
PL2        0.00 dB
PL12       20.00 dB
PL13       20.00 dB
SFO2      299.8711095 MHz

F2 - Processing parameters
SI         32768
SF         75.4623410 MHz
SOLVENT    CDCl3
NS         0
DS         0
SSB        0
LB         1.00 Hz
GB         0
PC         1.40

1D NMR plot parameters
CX         30.00 cm
F1P        234.651 ppm
F1         11563.24 Hz
F2P        -20.000 ppm
F2         -1506.05 Hz
NUC1CH    13C
NUC2CH    1H
PCNCH     96.451 Hz/cm
  
```

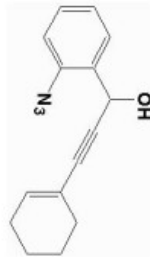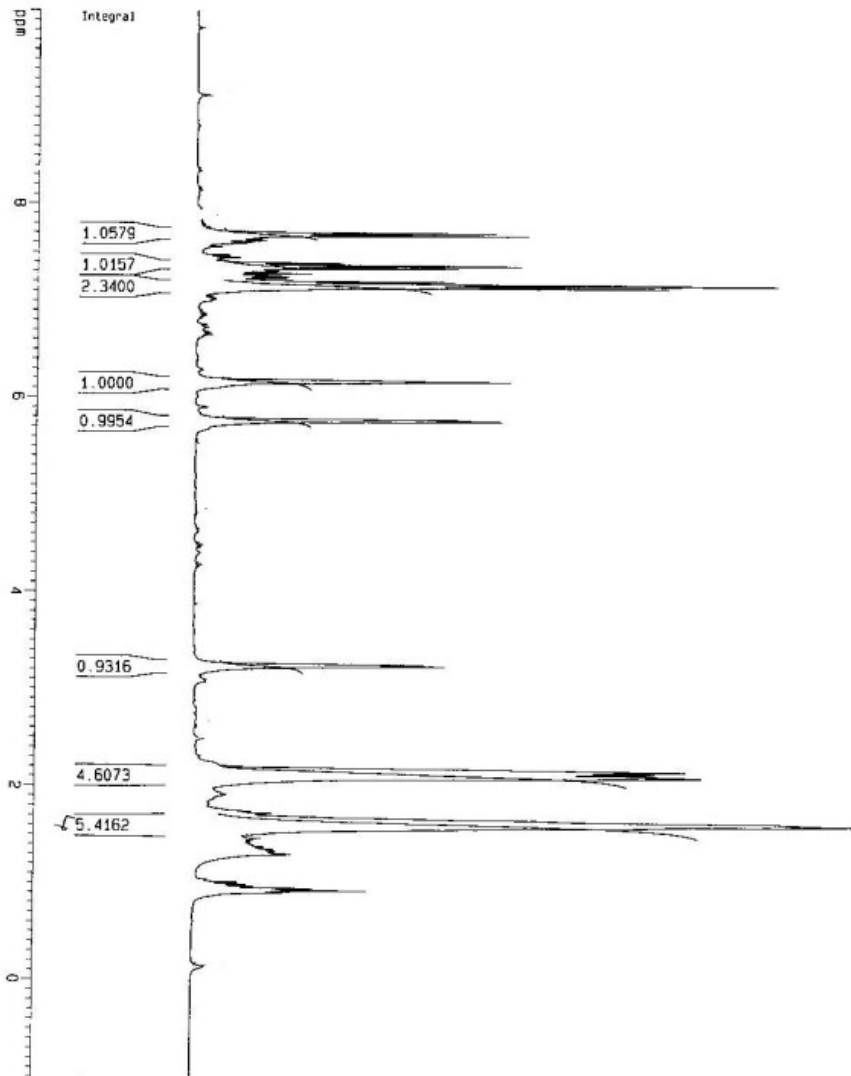

Current Data Parameters  
 NAME M1-59019-05  
 EXPNO 1  
 PROCNO 1

F2 - Acquisition Parameters  
 Date\_ 20050919  
 Time 16:51  
 INSTRUM spect  
 PROBRID 5 pr Omp 14/1  
 PULPROG zg30  
 TD 65536  
 SOLVENT CDCl3  
 NS 16  
 DS 2  
 SWH 6172.839 Hz  
 FIDRES 0.034190 Hz  
 AQ 5.3094660 sec  
 RG 35.9  
 DW 81.000 usec  
 DE 6.00 usec  
 TE 300.0 K  
 D1 1.00000000 sec

\*\*\*\*\* CHANNEL f1 \*\*\*\*\*  
 NUC1 1H  
 P1 11.70 usec  
 PL1 0.00 dB  
 SF01 259.0716518 MHz

F2 - Processing parameters  
 SI 32768  
 SF 299.8700000 MHz  
 WDW no  
 SSB 0  
 LB 0.00 Hz  
 GB 0  
 PC 1.00

ID NMR plot parameters  
 CX 20.00 cm  
 F1P 10.000 ppm  
 F1 2998.70 Hz  
 F2P -1.000 ppm  
 F2 -299.87 Hz  
 PRCM 0.55000 ppm/cm  
 HZCM 164.52950 Hz/cm



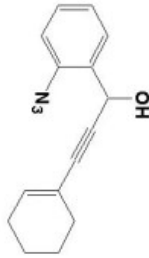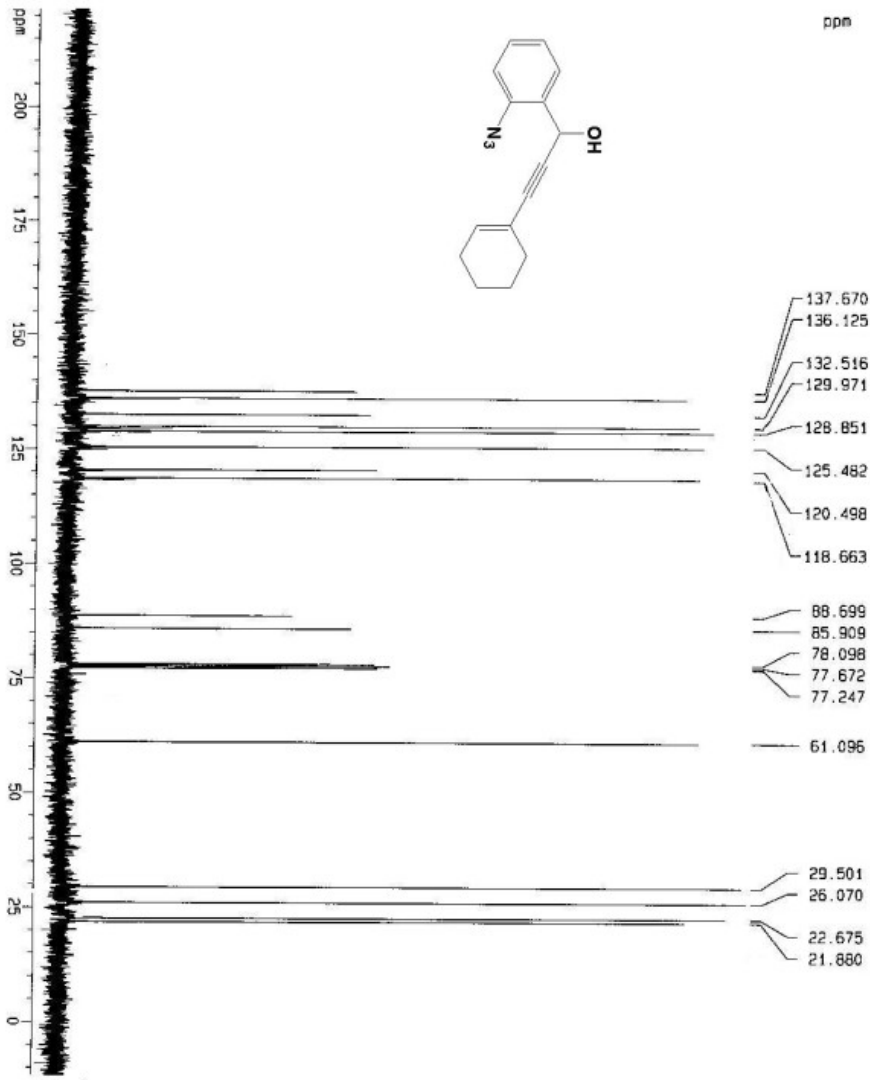

ppm

137.670  
136.125  
132.516  
129.971  
128.851  
125.482  
120.498  
118.663  
88.699  
85.909  
78.098  
77.672  
77.247  
61.096  
29.501  
26.070  
22.675  
21.880

```

Current Data Parameters
NAME      M1-Sm19-05
EXPNO     2
PROCNO    1
-----
F2 - Acquisition Parameters
Date_     20050915
Time      16.39
INSTRUM   spect
PROBHD    5 mm QNP 1H/1
PULPROG   zgpg30
TD         65536
SOLVENT   CDCl3
NS         43
DS         4
SMH       18796.592 Hz
FIDRES    0.268819 Hz
AQ         1.7433076 sec
RG         1024
OR         25.600 usec
DE         300.0 K
TE         2.90000000 sec
D11        0.05000000 sec
D12        0.00000000 sec
-----
***** CHANNEL f1 *****
NUC1       13C
P1         5.40 usec
PL1        -6.00 dB
SFO1       75.410637 MHz
-----
***** CHANNEL f2 *****
CPDPRG2   waltz16
NUC2       1H
P2         115.00 usec
PL2         0.00 dB
PC12       20.00 dB
PL13       20.00 dB
SFO2       200.8711956 MHz
-----
F2 - Processing parameters
SI         32768
SF         75.4023410 MHz
WDW        EM
SSB        0
LB         1.00 Hz
GB         0
PC         1.40
-----
10 NMR 13C parameters
CX         20.00 cm
F1P        231.464 GHz
F1         15689.38 MHz
F2         -11.011 GHz
F3PCMK     11.85276 GHz/cm
HZCM       878.64528 Hz/cm
  
```

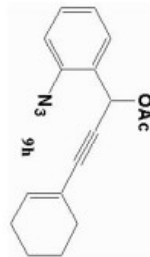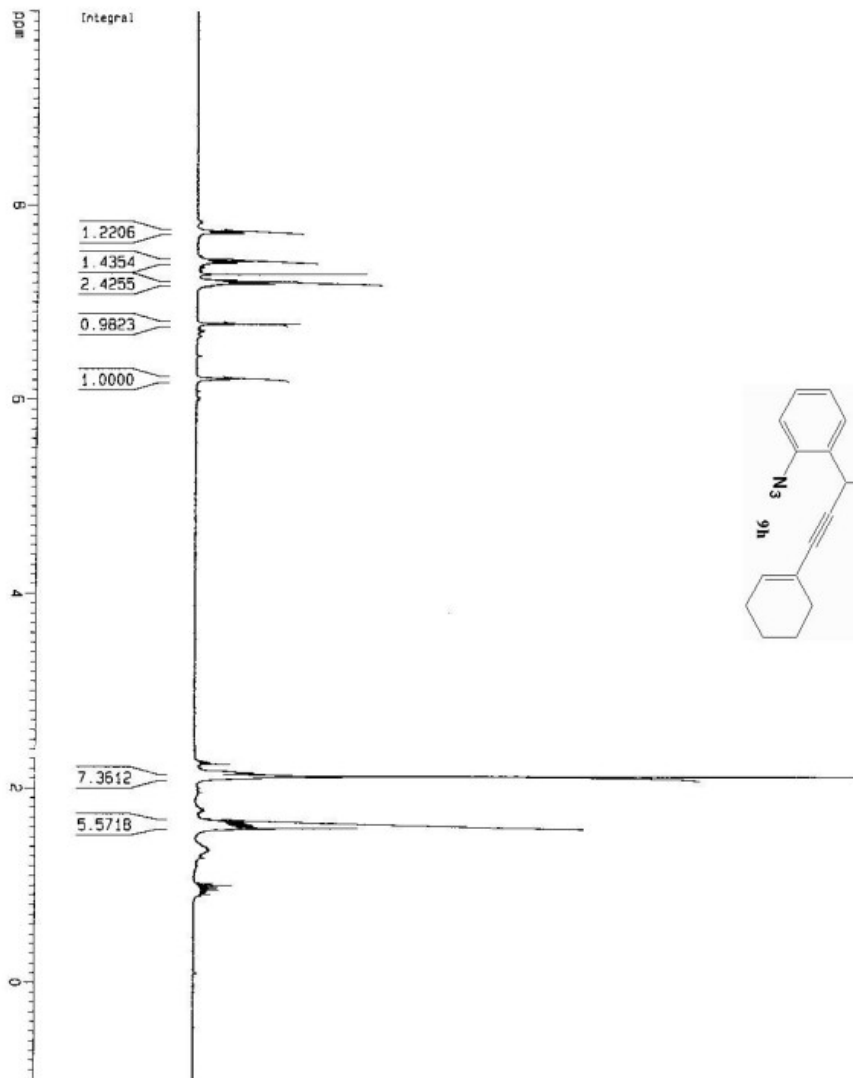

Current Data Parameters  
 NAME: M01-Apr-21-06  
 EXPNO: 4  
 PROCNO: 1

F2 - Acquisition Parameters  
 Date\_: 20060421  
 Time: 10.30  
 INSTRUM: spect  
 PROBRW: 5 MHz  
 PULPROG: zg30  
 TD: 65536  
 SOLVENT: CDCl3  
 NS: 16  
 DS: 2  
 SWH: 8279.146 Hz  
 FIDRES: 0.126314 Hz  
 AQ: 3.9584243 sec  
 RG: 1149.4  
 DM: 60.400 usec  
 DE: 6.00 usec  
 TE: 300.0 K  
 D1: 1.00000000 sec

===== CHANNEL f1 =====  
 NUC1: 1H  
 P1: 6.45 usec  
 PL1: 0.00 dB  
 SFO1: 400.1324710 MHz

F2 - Processing parameters  
 SI: 32768  
 SF: 400.1300000 MHz  
 NDM: no  
 SSB: 0  
 LB: 0.00 Hz  
 GB: 0  
 PC: 1.00

1D NMR plot parameters  
 CX: 20.00 cm  
 F1P: 10.000 ppm  
 F1: 4007.30 Hz  
 F2P: -1.000 ppm  
 F2: -400.13 Hz  
 PRNCH: 0.55000 ppm/cm  
 HZCH: 220.07149 Hz/cm

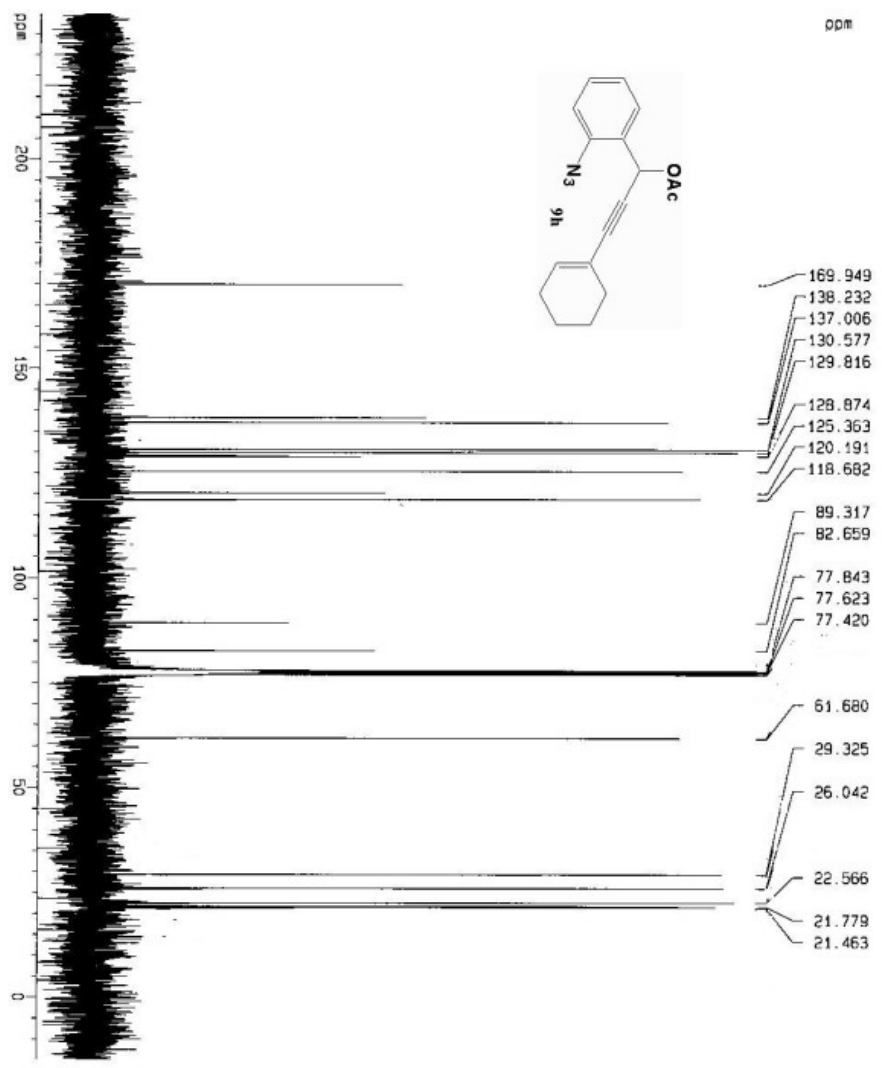

- 169.949
- 138.232
- 137.006
- 130.577
- 129.816
- 128.874
- 125.363
- 120.191
- 118.682
- 89.317
- 82.659
- 77.843
- 77.623
- 77.420
- 61.680
- 29.325
- 26.042
- 22.566
- 21.779
- 21.463

```

Current Data Parameters
NAME      MRI-Apr-22-06
EXPNO    1
PROCNO   1

F2 - Acquisition Parameters
Date_    20060422
Time     19.18
INSTRUM  spect
PROBHD   5 mm Multinu
PULPROG  zgpg30
TD        65536
SOLVENT  CDCl3
NS        500
DS        4
SFO1     100.625383 Hz
FIDRES   0.287360 Hz
AQ        1.7460326 sec
RG        17004
OR        26.500 usec
DE        6.00 usec
TE        300.0 K
D1        2.00000000 sec
d12       0.03000000 sec
d12       0.00000000 sec

***** CHANNEL f1 *****
NUC1      13C
P1        11.80 usec
PL1       0.00 dB
SFO1      75.4763200 MHz

***** CHANNEL f2 *****
CPDPRG2  waltz16
NUC2      1H
P2        110.00 usec
PL2       0.00 dB
PL12      17.50 dB
PL13      17.50 dB
SFO2      300.1312005 MHz

F2 - Processing parameters
SI        32768
SF        75.4677190 MHz
WDW        EM
SSB        0
LB         3.00 Hz
GB         0
PC         1.40

10 NMR list parameters
C1         20.00 cm
F1P        234.30 ppm
F1         37317.46 Hz
F2P        300.000 MHz
F2         300131200.5 Hz
P1PICK     12 21824 um/cg
HZCM       951.32566 Hz/7%
  
```

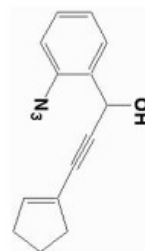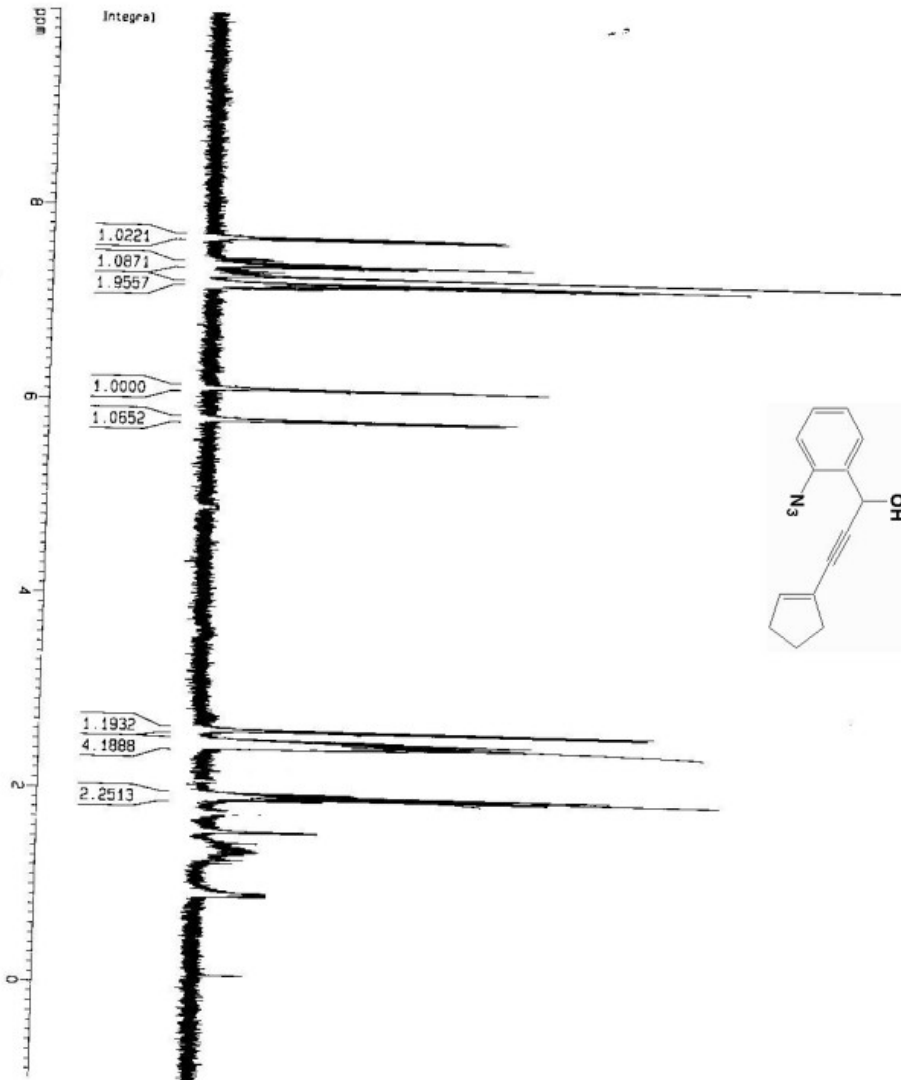

Current Data Parameters  
 NAME NMR-Apr20-05  
 EXPNO 6  
 PROCNO 1

F2 - Acquisition Parameters  
 Date\_ 20050420  
 Time 20:40  
 INSTRUM spect  
 PROBRD 5 mm BBI 1H-B  
 PULPROG zg30  
 TD 65536  
 SOLVENT CDCl3  
 NS 16  
 DS 2  
 SWH 8278.146 Hz  
 FIDRES 0.126314 Hz  
 AQ 3.9594243 sec  
 RG 3281  
 DM 60.400 usec  
 DE 6.00 usec  
 TE 300.0 K  
 D1 1.00000000 sec

\*\*\*\*\* CHANNEL f1 \*\*\*\*\*  
 NUCL1 1H  
 P1 6.45 usec  
 PL1 0.00 dB  
 SF01 400.1324710 MHz

F2 - Processing parameters  
 SI 32768  
 SF 400.1300000 MHz  
 WDM no  
 SSB no  
 LB 0.00 Hz  
 GB 0  
 PC 1.00

3D NMR plot parameters  
 CX 20.00 cm  
 F1P 10.000 ppm  
 F1 4001.30 Hz  
 F2P -1.000 ppm  
 F2 -400.13 Hz  
 PPMCK 0.55000 ppm/cm  
 HZCM 280.07150 Hz/cm

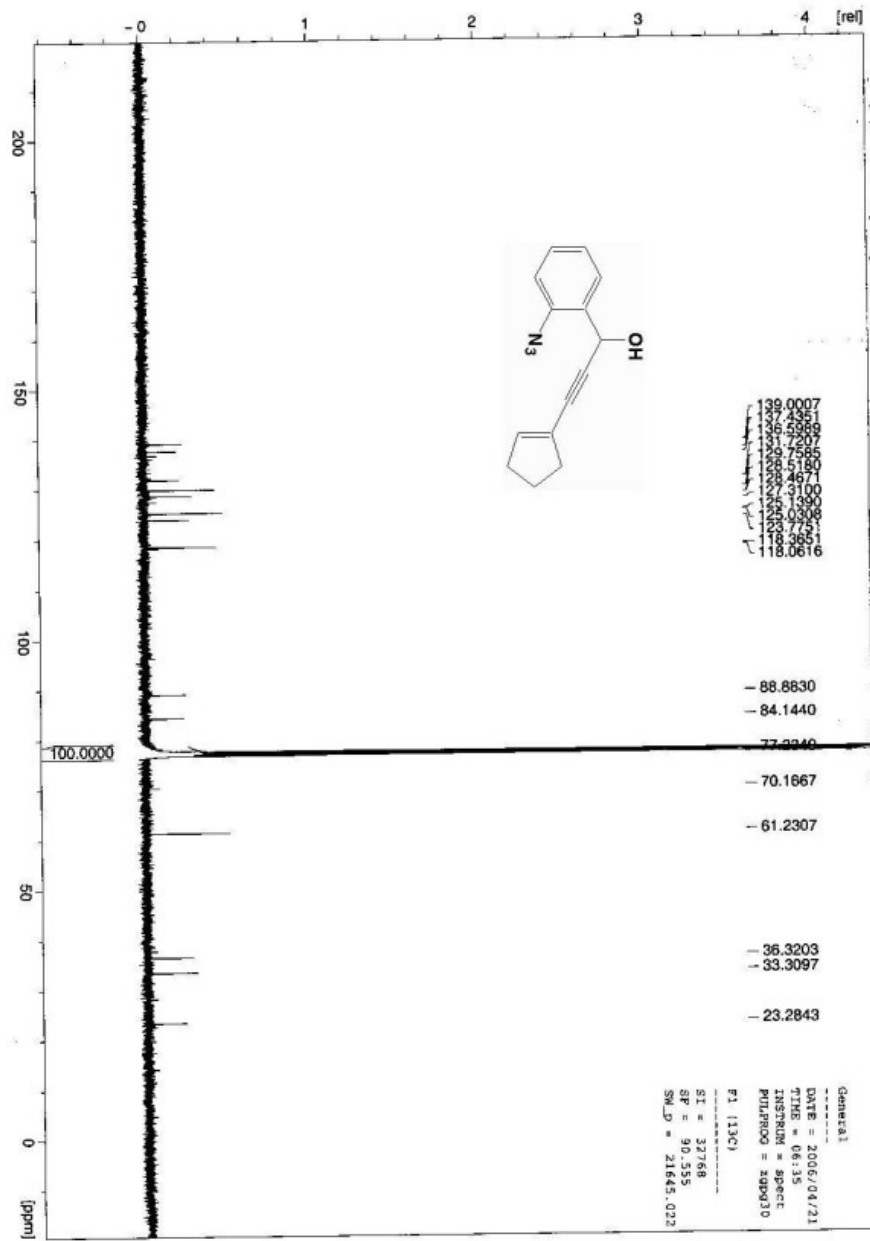

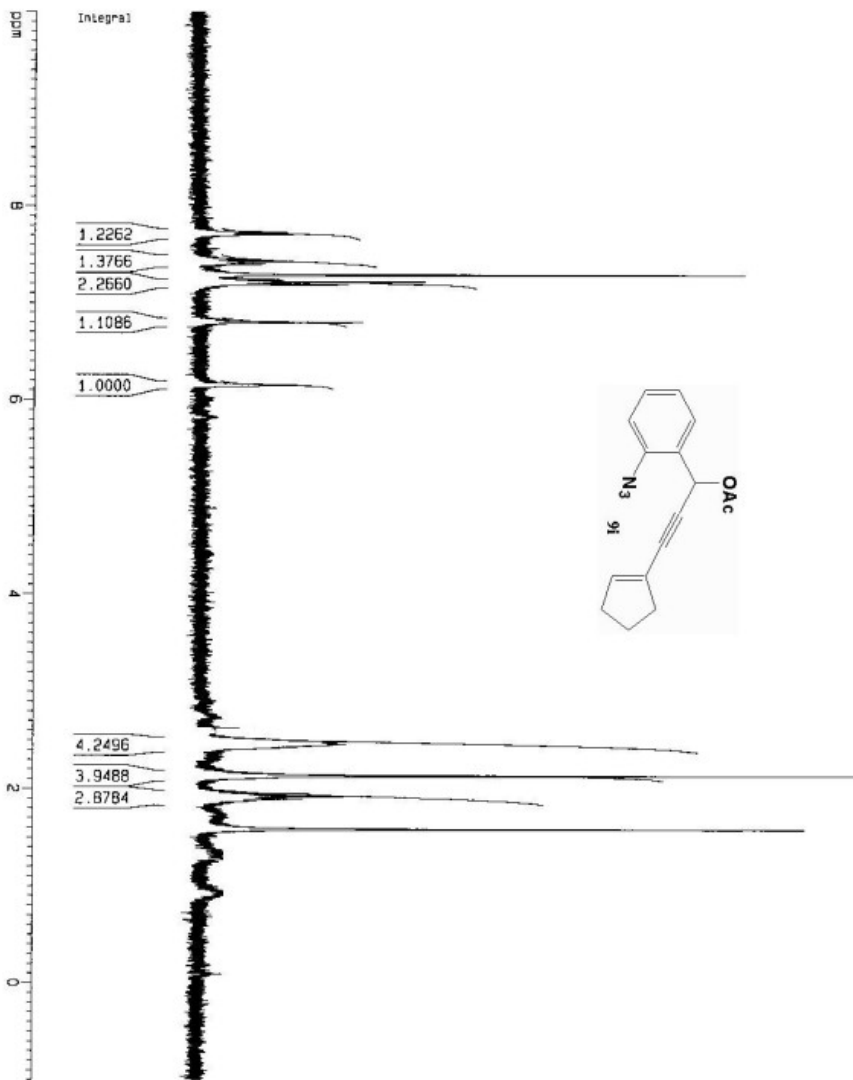

Current Data Parameters  
 NAME M1-Apr21-06  
 EXPNO 1  
 PROCNO 1

F2 - Acquisition Parameters

Date\_ 20060421  
 Time 15.00  
 INSTRUM spect  
 PROGRAM 5 mm Multisnu  
 PULPROG zg30  
 TD 65536  
 ID SOLVENT CDC13  
 NS 16  
 DS 2  
 OS 6172.835 Hz  
 SMH 0.094190 Hz  
 FTDEFS 5.3084660 sec  
 AQ 645.1  
 RG 81.000 usec  
 DW 5.00 usec  
 DE 300.0 K  
 TE 1.00000000 sec  
 D1

\*\*\*\*\* CHANNEL f1 \*\*\*\*\*

MUCL 1H  
 P1 9.80 usec  
 PL1 -6.00 dB  
 SF01 300.1318534 MHz

F2 - Processing parameters

SF 32768  
 SF 300.1300000 MHz  
 NDM no  
 SSB 0  
 LB 0.00 Hz  
 GB 0  
 PC 1.00

1D NMR plot parameters

CX 80.00 cm  
 F1P 10.000 ppm  
 F1 3001.30 Hz  
 F2P -1.000 ppm  
 F2 -300.13 Hz  
 PPMCM 0.55000 ppm/cm  
 HQCM 165.07150 Hz/cm

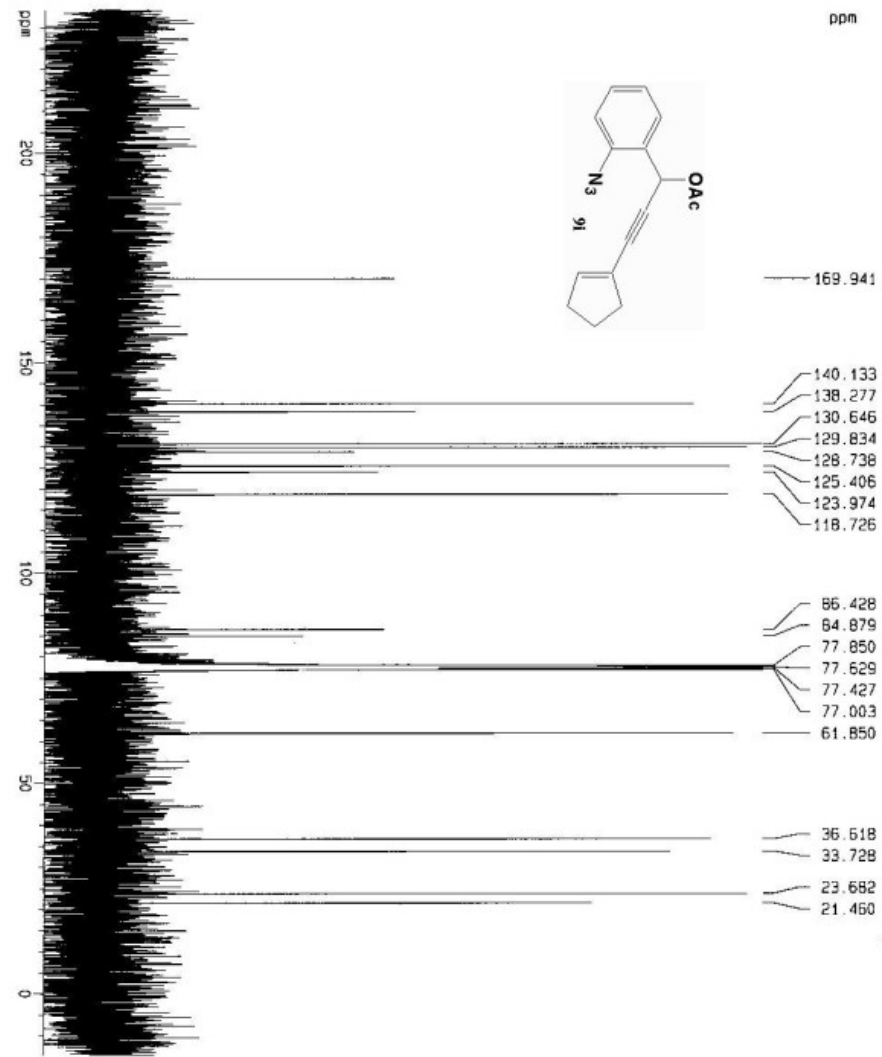

```

Current Data Parameters
NAME      M1-4p-21-05
EXPNO    1
PROCNO   1

F2 - Acquisition Parameters
Date_    20080422
Time     9.28
INSTRUM  spect
PROBHD   5 mm QNP 1H/1
PULPROG  zgpg30
TD        65536
SOLVENT  CDCl3
NS        12000
DS        4
SMH       18798.882 Hz
FIDRES    0.288818 Hz
AQ         1.7433076 sec
RG         256
AQ         2.56
DE         28.500 uS/ac
TE         300.0 K
D1         2.00000000 sec
D12        0.03000000 sec
D12        0.00020000 sec

***** CHANNEL f1 *****
NUC1      13C
P1        13C
PC1       5.00 uS/ac
SFO1      75.4100517 MHz

***** CHANNEL f2 *****
CPDPRG2  MULLIS
NUC2      1H
P2        115.00 uS/ac
PC2       0.00 uS
R12       20.00 uS
R13       20.00 uS
SFO2      200.871995 MHz

F2 - Processing parameters
SI         32768
SF         75.4023410 MHz
WDW        EM
SSB        0
LB         1.00 Hz
GB         0
PC         1.40

10 NMR data parameters
CX         20.00 cm
F1P        234.206 uS/n
F1         17693.55 Hz
F2P        -20.000 uS/n
F2         -1508.05 Hz
PWCW       12.71028 ppm/cm
HZCW       598.38477 Hz/cm
  
```

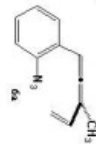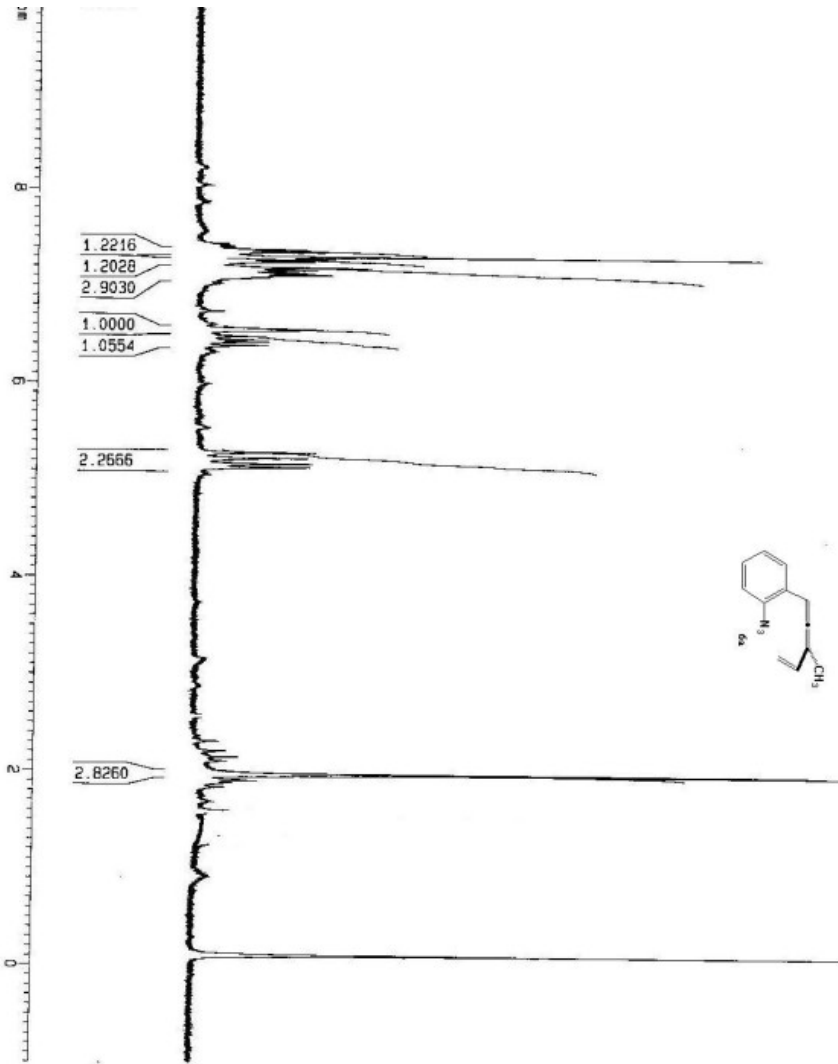

```

PROBHD 1
F2 - Acquisition Parameters
Date_ 20050308
Time 20.04
INSTNAM spect
PROBHD 5 mm DNP 1H/1
PULPROG zg30
TD 65536
SOLVENT DMS-D6
NS 11
DS 2
SWH 5172.899 Hz
FIDRES 0.054190 Hz
AQ 5.305459 sec
RG 812.7
DE 81.000 usec
TE 300.0 K
D1 1.00000000 sec
***** CHANNEL f1 *****
NUC1 1H
P1 11.70 usec
PL1 0.00 dB
SFO1 299.8716518 MHz
F2 - Processing parameters
SI 32768
SF 299.8700000 MHz
WDW no
SSB 0
LB 0.00 Hz
GB 0
PC 1.00
1D NMR plot parameters
CX 20.00 cm
FIP 10.000 ppm
F1 2998.70 Hz
F2 -1.000 ppm
PNUCH 0.55000 ppm/cm
HZCH 164.97650 MHz/cm

```



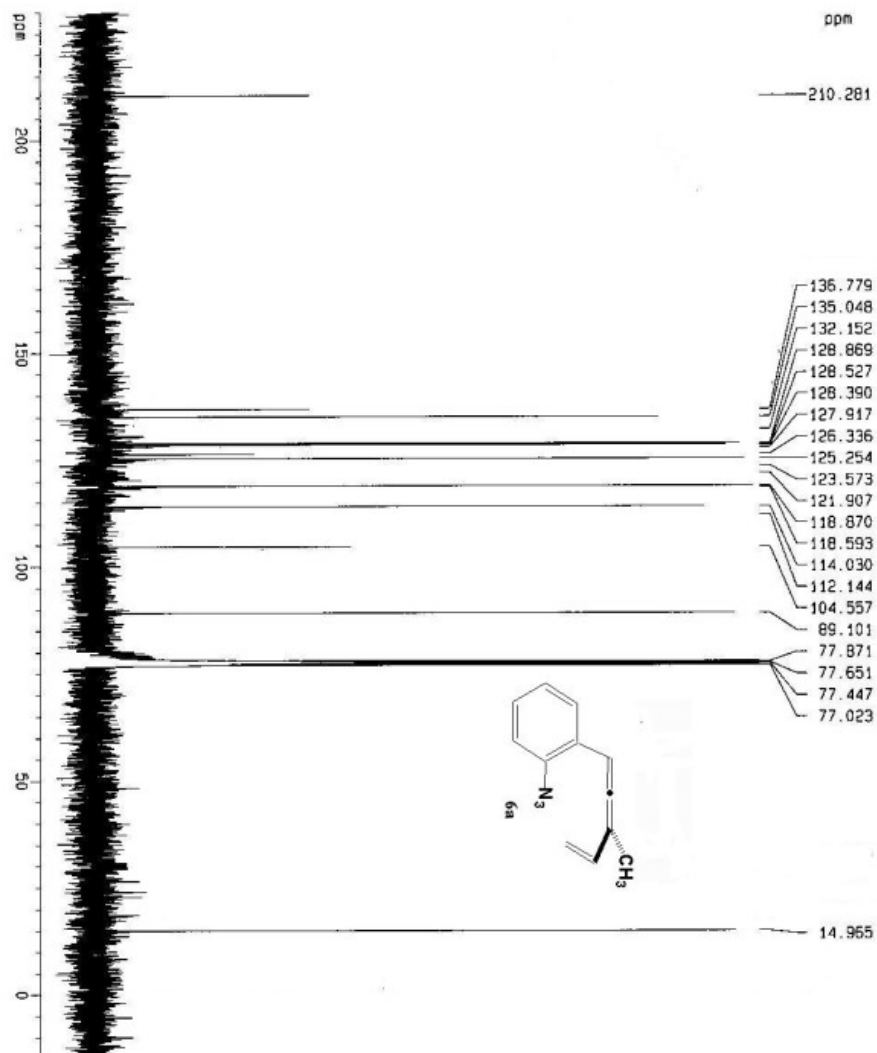

```

Current Data Parameters
NAME      MRI-MAR-06
EXPNO    7
PROCNO   1
-----
F2 - Acquisition Parameters
Date_    20050309
Time     6.07
INSTRUM  spect
PROBHD   5 mm QNP 1H/1
PULPROG  zgpg30
TD        65536
SOLVENT  CDCl3
NS        11500
DS        4
SWH       18396.992 Hz
FIDRES    0.166619 Hz
AQ         1.7453276 sec
RG         26
WDW        EM
SSB        0
GB         0
PC         300.0 K
TE         300.2 K
DE         5.00 usec
IE         2.00000000 sec
D11        0.03000000 sec
D12        0.00002000 sec
-----
***** CHANNEL f1 *****
NUC1      13C
P1         5.40 usec
PL1        -6.00 dB
SFO1      75.410657 MHz
-----
***** CHANNEL f2 *****
PROBHD2   MALT115
NUC2       1H
P2         115.00 usec
PL2         0.00 dB
SFO2      200.000000 MHz
-----
F2 - Processing parameters
SI         32768
SF         75.4023410 MHz
WDW        EM
SSB        0
LB         1.00 Hz
GB         0
PC         1.40
-----
1D NMR plot parameters
CK         20.00 cm
F1P        230.000 ppm
F1         173.94254 MHz
F2P        -260.000 ppm
F2         -1598.03 Hz
PFGMCH    12.50000 DPM/CM
SFC       32530 N/CM
  
```

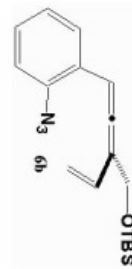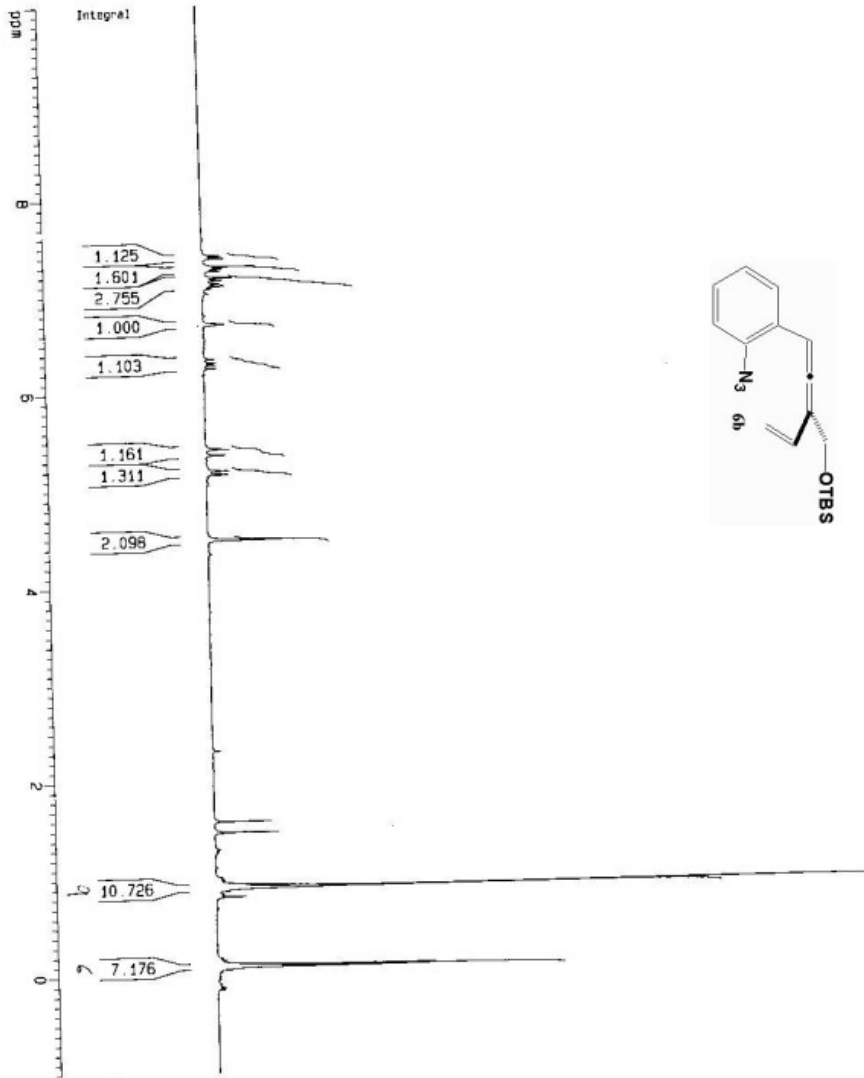

Current Data Parameters  
 NAME M01-02131-05  
 EXPNO 1  
 PROCNO 1

F2 - Acquisition Parameters

Date\_ 20051031  
 Time 14.05  
 INSTRUM spect  
 PROBRD 5 mm QNP 1H/1  
 PULPROG zgpg  
 TD 65535  
 TO SOLVENT CDCl3  
 NS 16  
 DS 2  
 SMH 6172.839 Hz  
 FIDRES 0.094190 Hz  
 AQ 5.3084660 sec  
 RG 256  
 DM 81.000 usec  
 DE 5.00 usec  
 TE 300.0 K  
 TC 1.00000000 sec  
 D1

\*\*\*\*\* CHANNEL f1 \*\*\*\*\*

NUC1 1H  
 P1 11.70 usec  
 PL1 0.00 dB  
 SFO1 299.9716918 MHz

F2 - Processing parameters

SI 32768  
 SF 299.9700000 MHz  
 WDM no  
 SSB 0  
 LB 0.00 Hz  
 GB 0  
 PC 1.00

1D NMR plot parameters:

CX 20.00 cm  
 F1e 10.000 ppm  
 F1 2998.70 Hz  
 F2p -1.000 ppm  
 F2 -299.87 Hz  
 PPMCM 0.35000 ppm/cm  
 NZCM 164.92850 Hz/cm

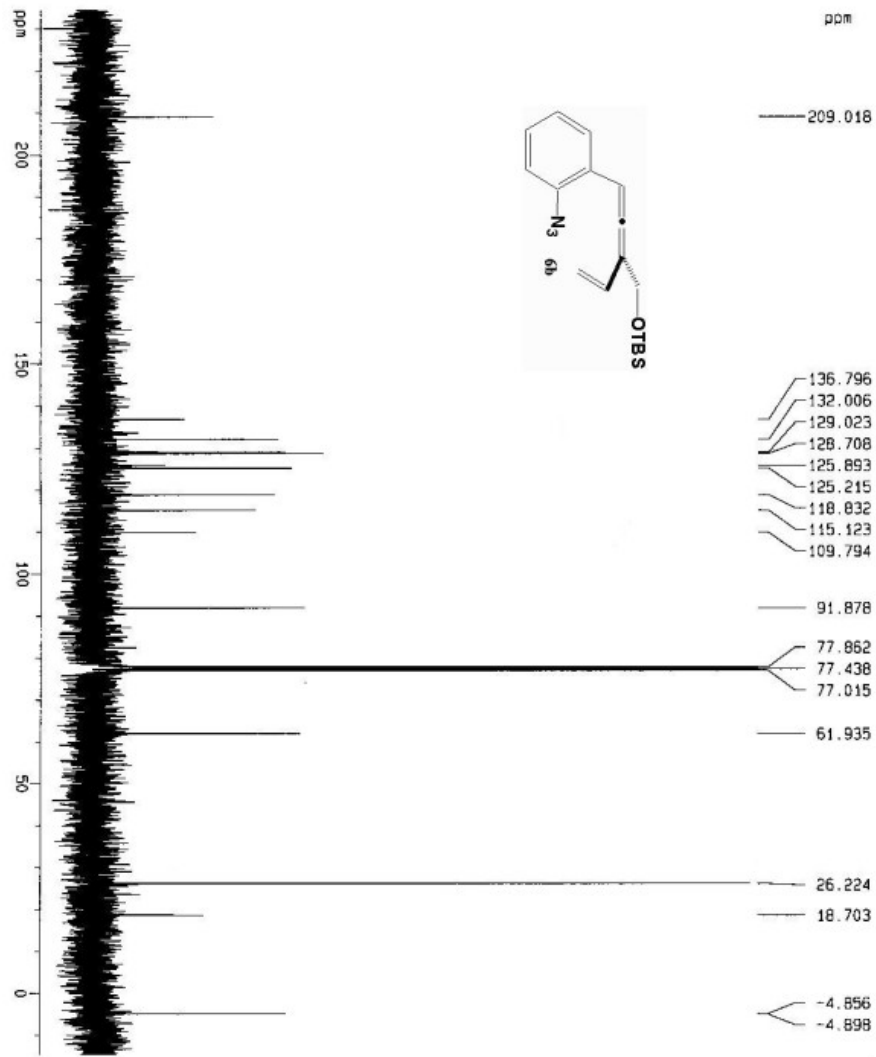

```

Current Data Parameters
NAME      MW1-DC131-05
EXPNO    2
PROCNO   1

F2 - Acquisition Parameters
Date_    20051031
Time     14.20
INSTRUM  spect
PROBHD   5 mm DNP HV/1
PULPROG  zgpg30
TD        65536
SOLVENT  CDCl3
NS        209
DS        4
SWH       18796.952 Hz
FIDRES   0.768819 Hz
AQ        1.743076 sec
RG         256
DM         28.600 uS/ac
DE         6.00 uS/ac
TE        300.0 K
O1        2.00000000 sec
O2        0.03000000 sec
O3        0.00000000 sec
O4        0.00000000 sec

***** CHANNEL f1 *****
NUC1      13C
P1        5.00 uS/ac
PC1       8.00 dB
SFO1      75.410657 MHz

***** CHANNEL f2 *****
CPROG2    waltz16
NUC2       1H
P2        115.00 uS/ac
PC2       0.00 dB
R12       20.00 dB
R13       20.00 dB
SFO2      283.871985 MHz

F2 - Processing parameters
SI         32768
SF         75.4023410 MHz
WDW        EM
SSB        0
LB         1.00 Hz
GB         0
PC         1.40

10 NMR 01ct parameters
CX         20.00 cm
FLP        234.661 ppm
F1         17683.24 Hz
F2P        -20.000 ppm
F2         -1508.05 Hz
P1RCM     12.73255 ppm/cm
HZCM      960.08461 Hz/cm
  
```

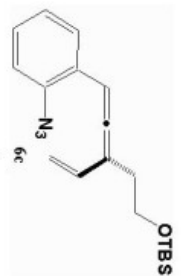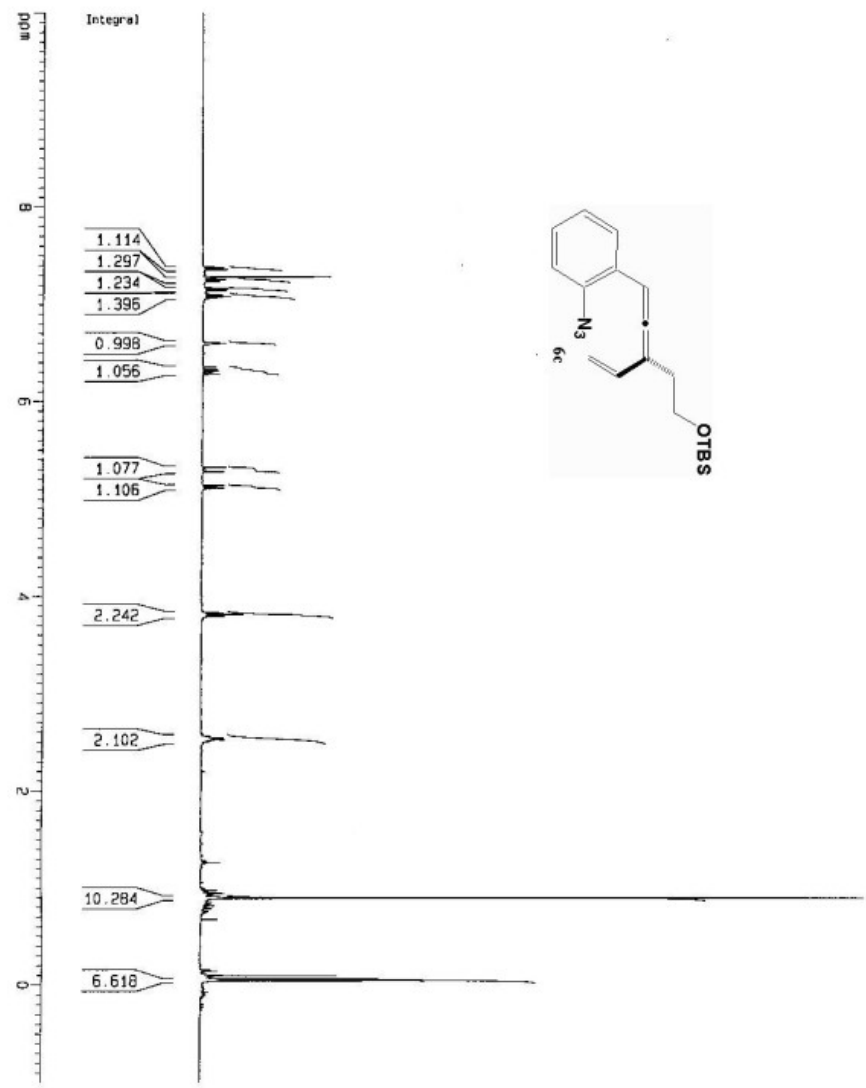

Current Data Parameters  
 NAME N1-0127-05  
 EXPNO 3  
 PROCNO 1

F2 - Acquisition Parameters  
 Date\_ 20051027  
 Time 9.43  
 INSTRUM spect  
 PULPROG 5 mm BBI 1H-B  
 TD 4330  
 FIDRES 0.5536  
 SOLVENT DMS-D6  
 NS 16  
 DS 2  
 SWH 8275.145 Hz  
 F1RES 0.126314 Hz  
 AQ 3.9584243 sec  
 RG 574.7  
 DW 60.400 usec  
 DE 6.00 usec  
 TE 300.0 K  
 D1 1.00000000 sec

\*\*\*\*\* CHANNEL f1 \*\*\*\*\*  
 NUC1 1H  
 P1 6.45 usec  
 PL1 0.00 dB  
 SFO1 400.1264710 MHz

F2 - Processing parameters  
 SI 32768  
 SF 400.1000000 MHz  
 KW 0  
 SSB 0  
 LB 0.00 Hz  
 GB 0  
 PC 1.00

10 MHz plot parameters  
 CX 20.00 cm  
 FIP 10.000 ppm  
 F1 4001.30 Hz  
 F2P -1.000 ppm  
 F2 -400.13 Hz  
 FREQM 0.55000 ppm/cm  
 FZDM 220.07150 Hz/cm

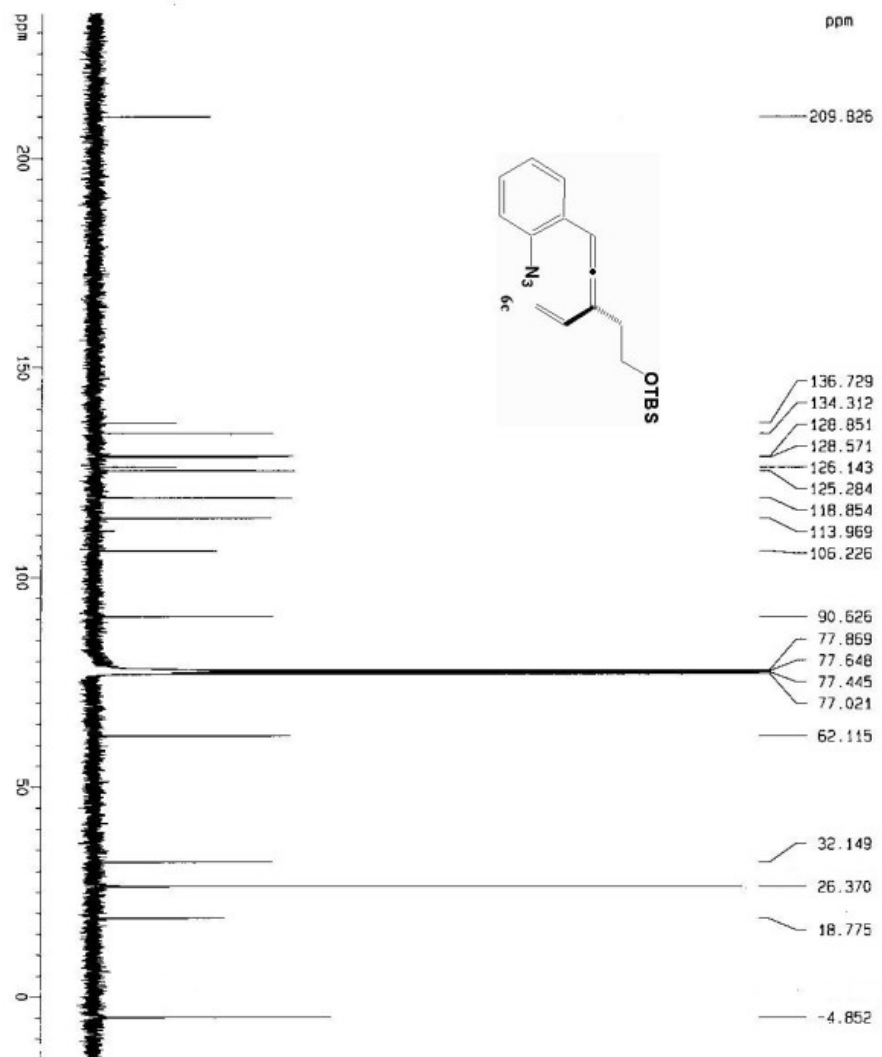

Current Data Parameters

|        |             |
|--------|-------------|
| NAME   | MT-NOV02-05 |
| EXPNO  | 4           |
| PROCNO | 1           |

F2 - Acquisition Parameters

|         |               |
|---------|---------------|
| Date_   | 20051103      |
| Time    | 8.12          |
| INSTRUM | spect         |
| PROBHD  | 5 mm QNP 1H/1 |
| PULPROG | zgpg30        |
| TD      | 65536         |
| SOLVENT | CDCl3         |
| NS      | 11000         |
| DS      | 4             |
| SWH     | 18796.982 Hz  |
| FIDRES  | 0.268819 Hz   |
| AQ      | 1.7433276 sec |
| RG      | 1024          |
| DM      | 26.600 usec   |
| DE      | 18.000 usec   |
| TE      | 300.2 K       |
| D1      | 3.0000000 sec |
| D11     | 0.0300000 sec |
| D12     | 0.0000000 sec |

\*\*\*\*\* CHANNEL f1 \*\*\*\*\*

|      |               |
|------|---------------|
| NUC1 | 13C           |
| P1   | 5.40 usec     |
| PL1  | -6.00 dB      |
| SFO1 | 75.418337 MHz |

\*\*\*\*\* CHANNEL f2 \*\*\*\*\*

|         |                |
|---------|----------------|
| CROSSP2 | WALTZ16        |
| NUC2    | 1H             |
| PCPD2   | 115.00 usec    |
| PL2     | 0.00 dB        |
| PL12    | 20.00 dB       |
| PL13    | 20.00 dB       |
| SFO2    | 298.871795 MHz |

F2 - Processing parameters

|     |                |
|-----|----------------|
| SF  | 327766         |
| WF  | 75.4023410 MHz |
| MEM | EM             |
| SSB | 0              |
| LB  | 1.00 Hz        |
| GB  | 0              |
| PC  | 1.40           |

10 MHz plot parameters

|        |                 |
|--------|-----------------|
| CX     | 20.00 cm        |
| FIP    | 234.631 ppm     |
| F1     | 17933.24 Hz     |
| F2     | -50.000 ppm     |
| PRINCM | -1508.05 Hz     |
| PRINCM | 12.74250 ppm/cm |
| HZCM   | 950.08440 Hz/cm |

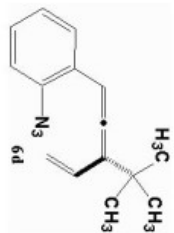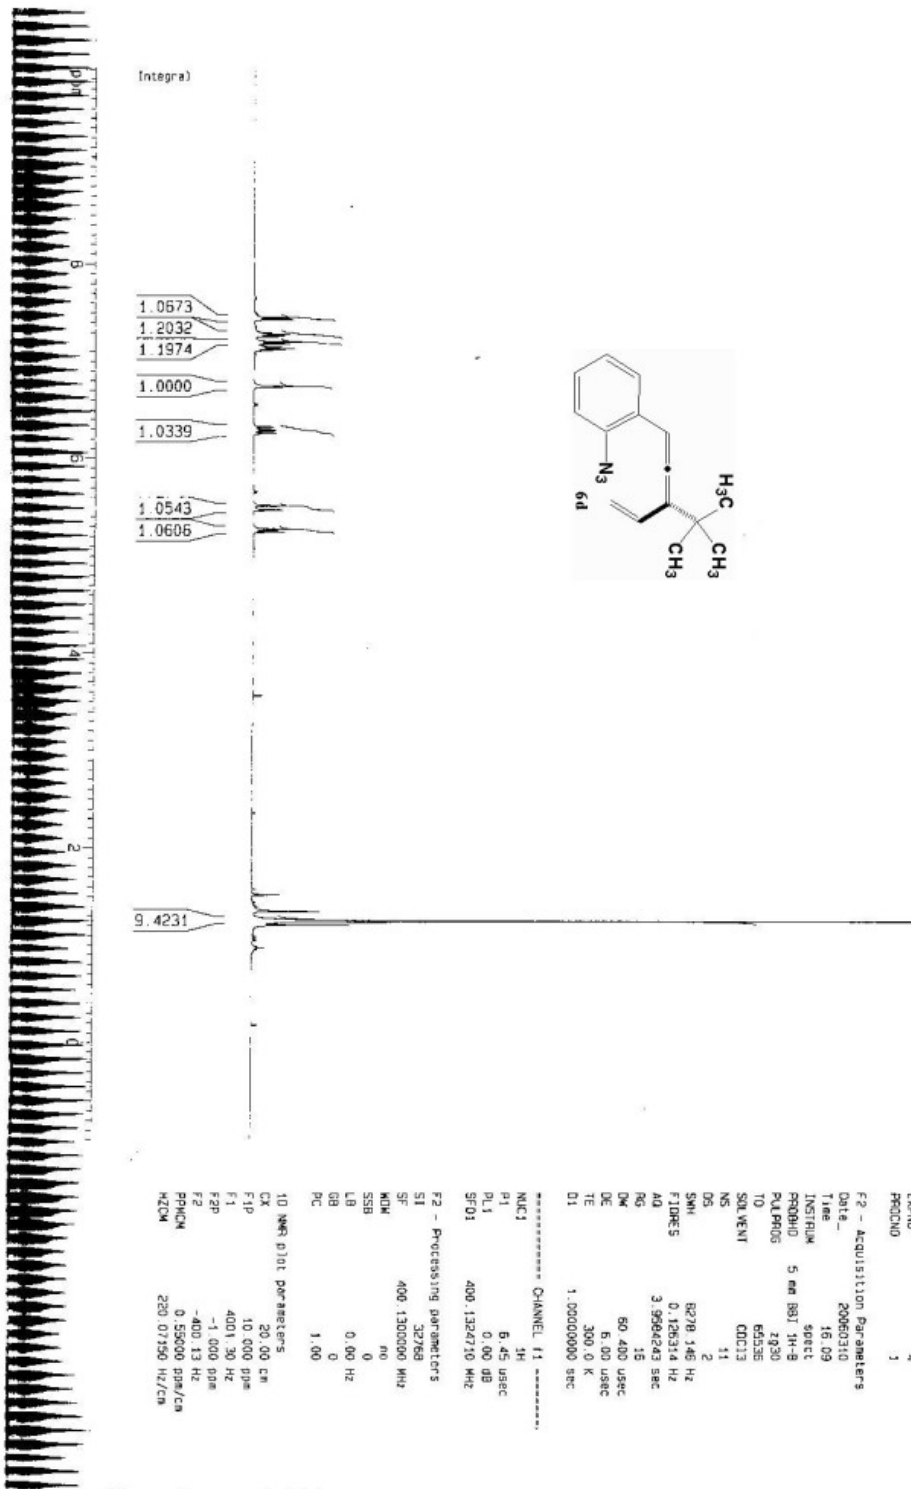

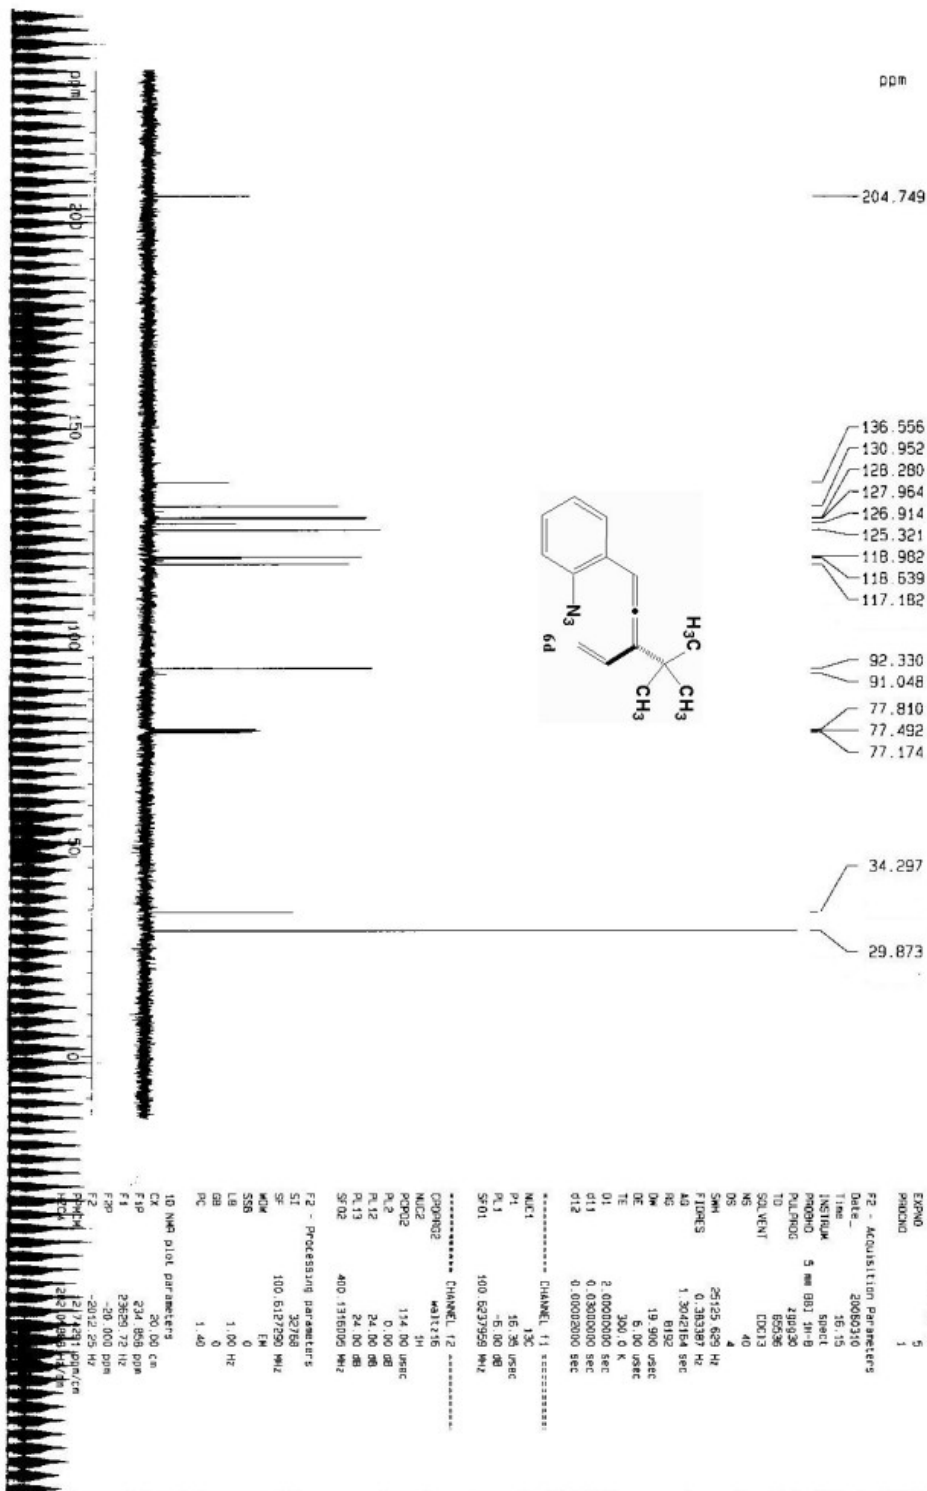

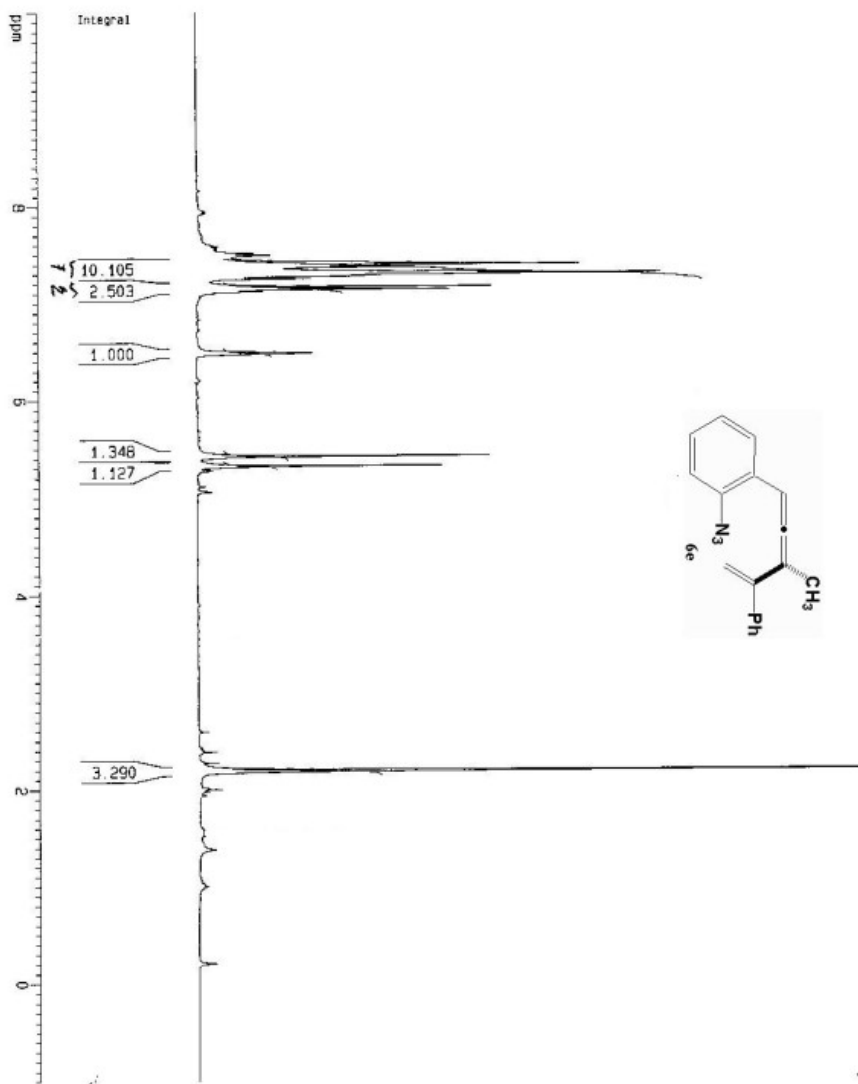

Current Data Parameters  
 Name: M81-DEC30-05  
 ExpNO: 2  
 PROCNO: 1

F2 - Acquisition Parameters

Date\_: 20051230  
 Time: 17.46  
 INSTRUM: spect  
 PROBDW: 5 mm QNP 1H/1  
 PULPROG: zgpg30  
 TD: 65536  
 SOLVENT: CDCl3  
 NS: 9  
 DS: 2  
 SWH: 8172.839 Hz  
 FIDRES: 0.094190 Hz  
 AQ: 5.208460 sec  
 RG: 50.5  
 DM: 81.000 usec  
 DE: 6.00 usec  
 TE: 300.2 K  
 D1: 1.00000000 sec

CHANNEL f1

NUC1: 1H  
 P1: 11.70 usec  
 PL1: 0.00 dB  
 SF01: 299.8718018 MHz

F2 - Processing parameters

SF: 32766  
 FIDRES: 0.094190 Hz  
 KOP: 0  
 SSB: 0  
 LB: 0.00 Hz  
 GB: 0  
 PC: 1.00

1D NMR F101 parameters

CX: 20.00 cm  
 F1P: 10.000 ppm  
 F1: 299.870 Hz  
 F2P: -1.000 ppm  
 F2: -299.87 Hz  
 PPM/CM: 0.35000 ppm/cm  
 HZ/CM: 164.32850 Hz/cm



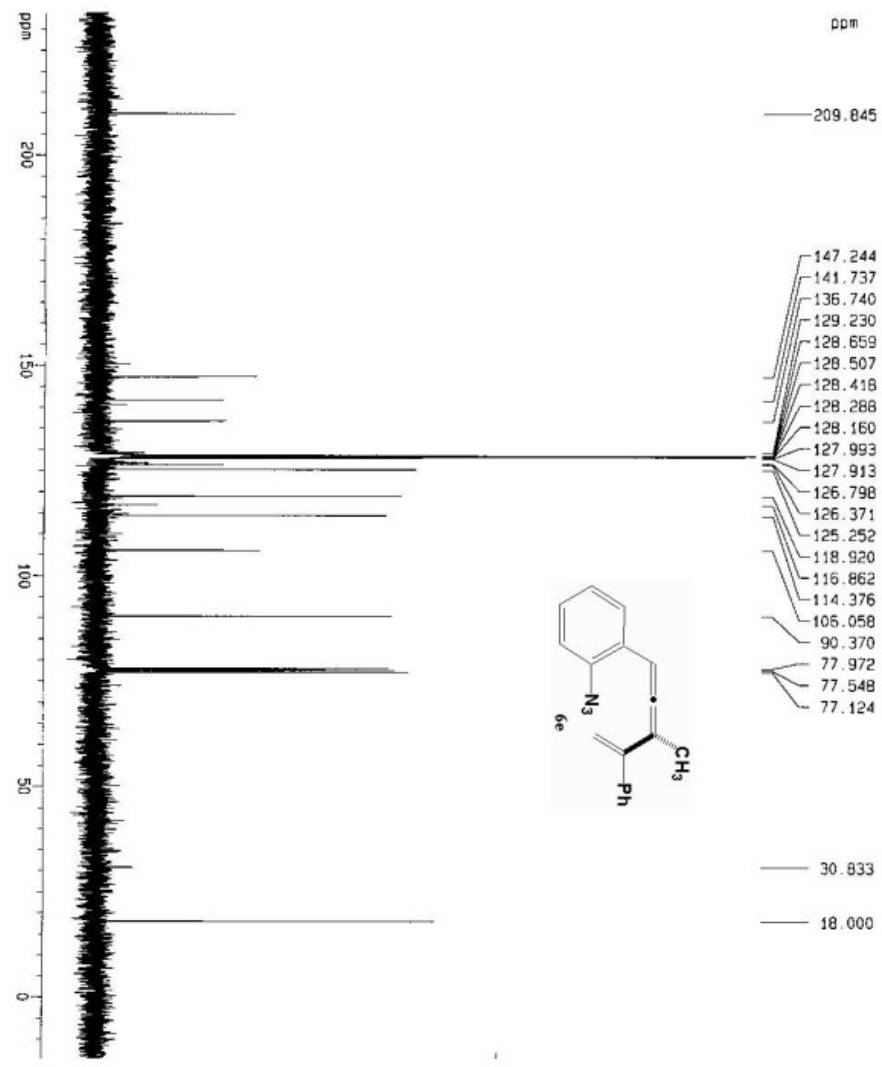

```

Current Data Parameters
NAME      H4176230-05
EXPNO    2
PROCNO   1

F2 - Acquisition Parameters
Date_    20051230
Time     17.52
INSTRUM  spect
PROBHD   5 mm QNP 1H/1
PULPROG  zgpg30
TD        65536
SOLVENT  CDCl3
NS        28
DS        4
SWH       16795.992 Hz
FIDRES    0.286819 Hz
AQ         1.7433075 sec
RG         1024
DE         26.800 usec
TE         300.0 K
D1         2.00000000 sec
D11        0.03600000 sec
D12        0.00020000 sec

***** CHANNEL f1 *****
NUC1       13C
P1         5.40 usec
PL1        -6.00 dB
SFO1       75.4706377 MHz

***** CHANNEL f2 *****
CPDPRG2   waltz16
NUC2       1H
PCPD2     115.00 usec
PL2        0.00 dB
PL12       20.00 dB
PL13       20.00 dB
SFO2       299.871592 MHz

F2 - Processing parameters
SI         32768
SF         75.4632410 MHz
WDW        EM
SSB        0
LB         1.00 Hz
GB         0
PC         1.40

1D NMR plot parameters
CX         20.00 cm
F1P        234.000 ppm
F1         17644.55 Hz
F2P        -20.000 ppm
F2         -1508.05 Hz
PULPROG    12.70000 usec/cm
NUC1       957.60874 Hz/cm
NUC2
  
```

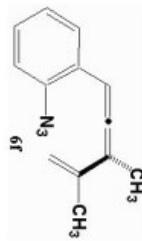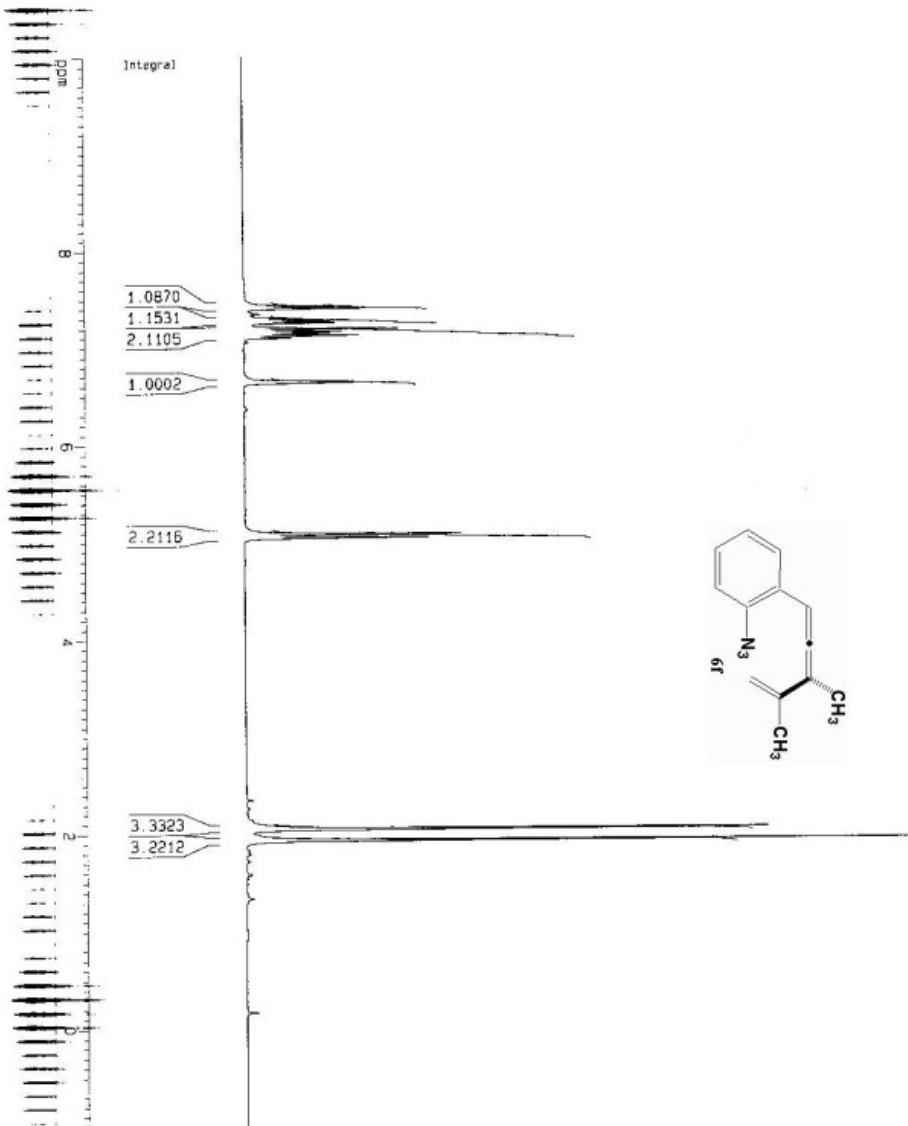

Current Data Parameters  
 NAME MFL-JAN10-05  
 EXPNO 1  
 PROCNO 1

F2 - Acquisition Parameters  
 Date\_ 20060110  
 Time 17:25  
 INSTRUM spect  
 PROBNM 5 mm WJ11nu  
 PULPROG zgpg30  
 TD 65536  
 SOLVENT CDCl3  
 NS 2  
 DS 2  
 SWH 6172.839 Hz  
 FIDRES 0.094190 Hz  
 AQ 5.3084650 sec  
 RG 90.5  
 DM 91.000 usec  
 DE 6.00 usec  
 TE 300.0 K  
 D1 1.00000000 sec

\*\*\*\*\* CHANNEL f1 \*\*\*\*\*  
 NUC1 1H  
 P1 9.60 usec  
 PL1 -6.00 dB  
 SFO1 300.1318534 MHz

F2 - Processing parameters  
 SI 32768  
 SF 300.1300000 MHz  
 WDW no  
 SSB 0  
 LB 0.00 Hz  
 GB 0  
 PC 1.00

1D NMR plot parameters  
 CX 20.00 cm  
 F1P 10.000 ppm  
 F1 3001.30 Hz  
 F2P -1.000 ppm  
 F2 -300.13 Hz  
 PPGCM 0.95000 ppm/cm  
 HZCM 165.07150 Hz/cm

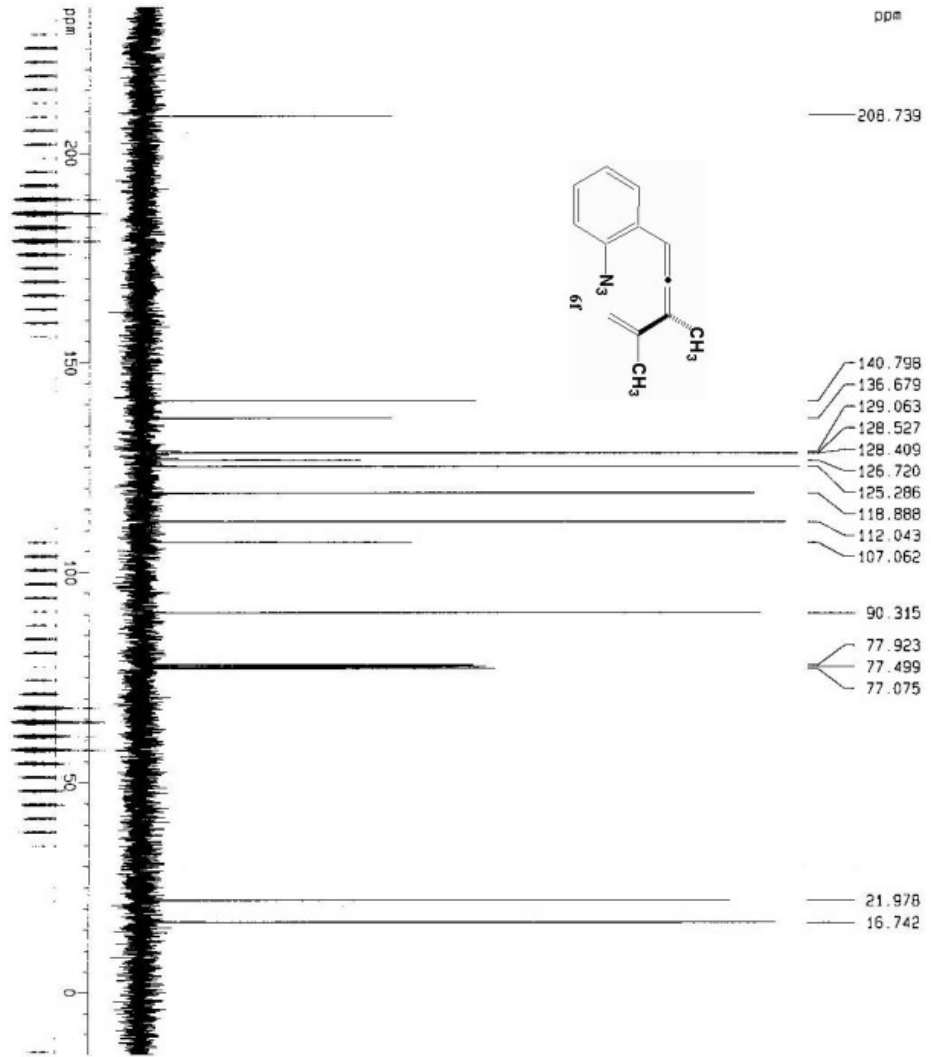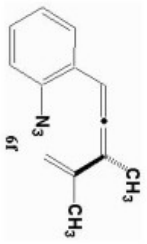

- 140.798
- 136.679
- 129.063
- 128.527
- 128.409
- 126.720
- 125.286
- 118.888
- 112.043
- 107.062

- 90.315
- 77.923
- 77.499
- 77.075

- 21.978
- 16.742

```

Current Data Parameters
NAME          M01-Jan10-05
EXPNO        2
PROCNO       1
Date_         20060110
Time         17.32
INSTRUM      spect
PROBHD       5 mm H-130
PULPROG      zgpg30
TD            65536
SOLVENT      CDCl3
NS            36
DS            4
SWH           18632.303 Hz
FIDRES        0.287360 Hz
AQ            1.7400308 sec
RG            16384
DE            26.550 usec
TE            300.0 K
D1            2.00000000 sec
d11           0.03000000 sec
d12           0.00020000 sec

***** CHANNEL f1 *****
NAC1          13C
P1            11.80 usec
PA.1          0.00 dB
SFO1          75.4760200 MHz

***** CHANNEL f2 *****
CPDPRG2      waltz16
NUC2          1H
PCPD2        110.00 usec
PL2           0.00 dB
PL12         17.50 dB
PL13         17.50 dB
SFO2         300.1312000 MHz

F2 - Processing parameters
SI            32768
SF            75.4671950 MHz
SM            EM
SOLVENT       CDCl3
GB            1.00 Hz
GB            0
PC            1.40

1D NMR plot 6f-deriv13
CX            20.00 cm
F1P           234.760 ppm
F1            17717.18 Hz
F2P           -20.000 ppm
F2            11808.35 Hz
PRINXM       127.8834 ppm/cm
          581.2555 MHz/cm
  
```

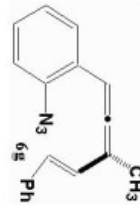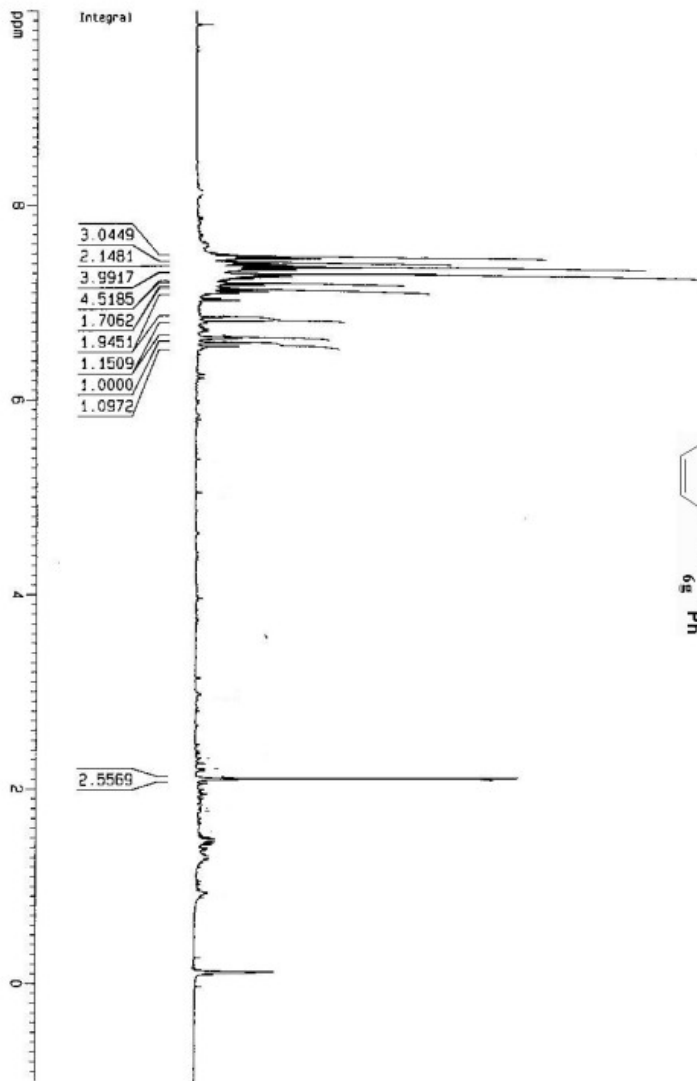

Current Data Parameters  
 NAME H61-0127-05  
 EXPNO 1  
 PROCNO 1

F2 - Acquisition Parameters  
 Date\_ 20051027  
 Time 9:12  
 INSTRUM spect  
 PROBHD 5 mm BBI 1H-5  
 PULPROG zg30  
 TD 65536  
 SOLVENT CDCl3  
 NS 9  
 DS 2  
 SWH 8278.145 Hz  
 FIDRES 0.126314 Hz  
 AQ 3.984243 sec  
 RG 228.1  
 DW 60.400 usec  
 DE 6.00 usec  
 TE 300.0 K  
 D1 1.00000000 sec

\*\*\*\*\* CHANNEL f1 \*\*\*\*\*  
 NUC1 1H  
 P1 6.45 usec  
 PL1 0.00 dB  
 SFO1 400.1324710 MHz

F2 - Processing parameters  
 SI 32768  
 SF 400.1300000 KHz  
 WDW nc  
 SSB 0  
 LB 0.00 Hz  
 GB 0  
 PC 1.00

10 MHz plot parameters  
 CX 20.00 cm  
 F1P 10.000 ppm  
 F1 4001.30 Hz  
 F2P -1.000 ppm  
 F2 -40.13 Hz  
 PRICK 0.55000 ppm/cm  
 RFLW 220.07150 Hz/cm

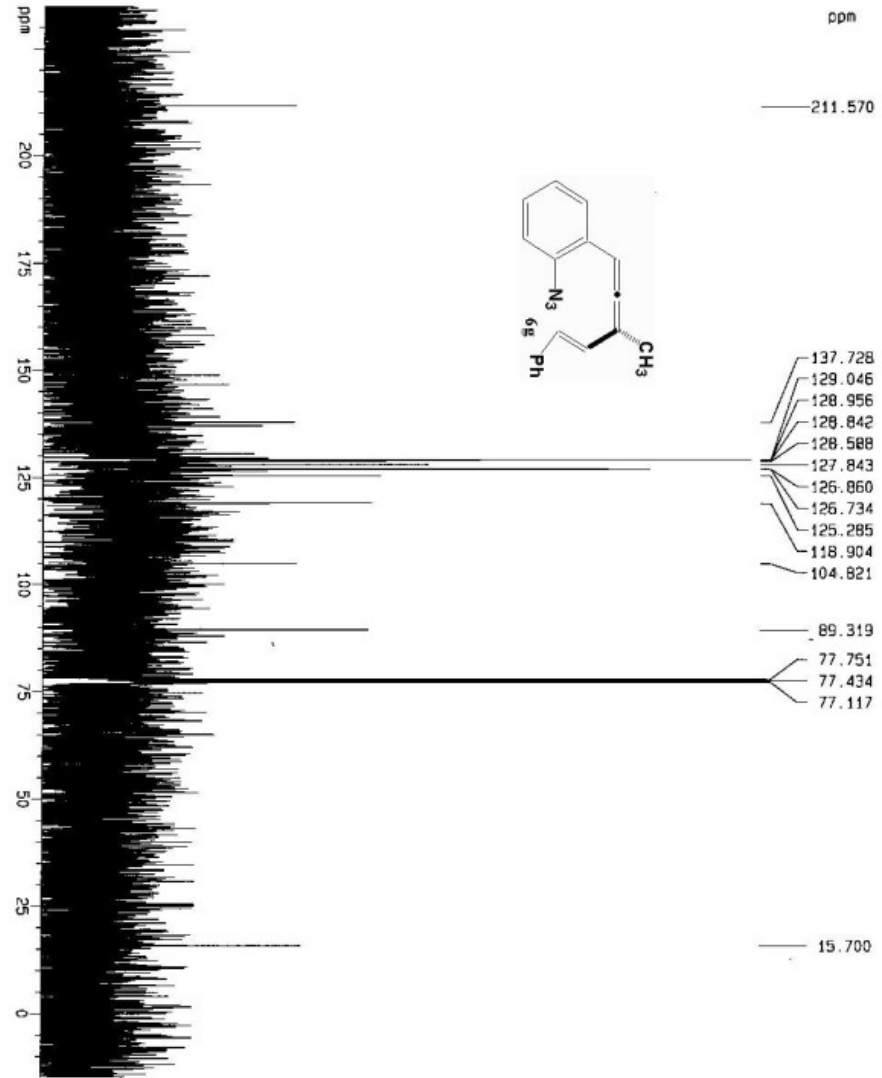

```

Current Data Parameters
NAME          M41-001271-05
EXPNO        2
PROCNO       1
F2 - Acquisition Parameters
Date_         20051027
Time          9.30
INSTRUM      spect
PROBHD       5 mm BBI 1H-8
PULPROG      zgpg30
TD           65536
SOLVENT      CDCl3
NS           311
DS           4
SWH          25125.629 Hz
FIDRES       0.36337 Hz
AQ           1.3042154 sec
RG           15384
DM           19.900 usec
DE           5.00 usec
TE           300.0 K
D1           2.00000000 sec
d12          0.03000000 sec
d122         0.00000000 sec

***** CHANNEL f1 *****
NUC1         13C
P1           15.35 usec
PL1         -5.00 dB
SFO1        100.6237959 MHz

***** CHANNEL f2 *****
CPDPRG2     MSL212B
NUC2         13C
PCPD2       114.00 usec
PL2         0.00 dB
PL12        24.00 dB
PL13        24.00 dB
SFO2        400.1315002 MHz

F2 - Processing parameters
SI           32768
SF           100.6127290 MHz
WDW          EM
SSB          0
LB           1.00 Hz
GB           0
PC           1.40

ID NAME PLOT parameters.
CX          20.00 cm
F1p         234.685 ppm
F1          20629.72 Hz
F2p         -14.969 ppm
F2          -1495.51 Hz
PROMCHK     12.48531 muA/cm
HZDM        1265.28137 Hz/cm
  
```

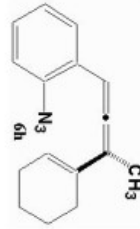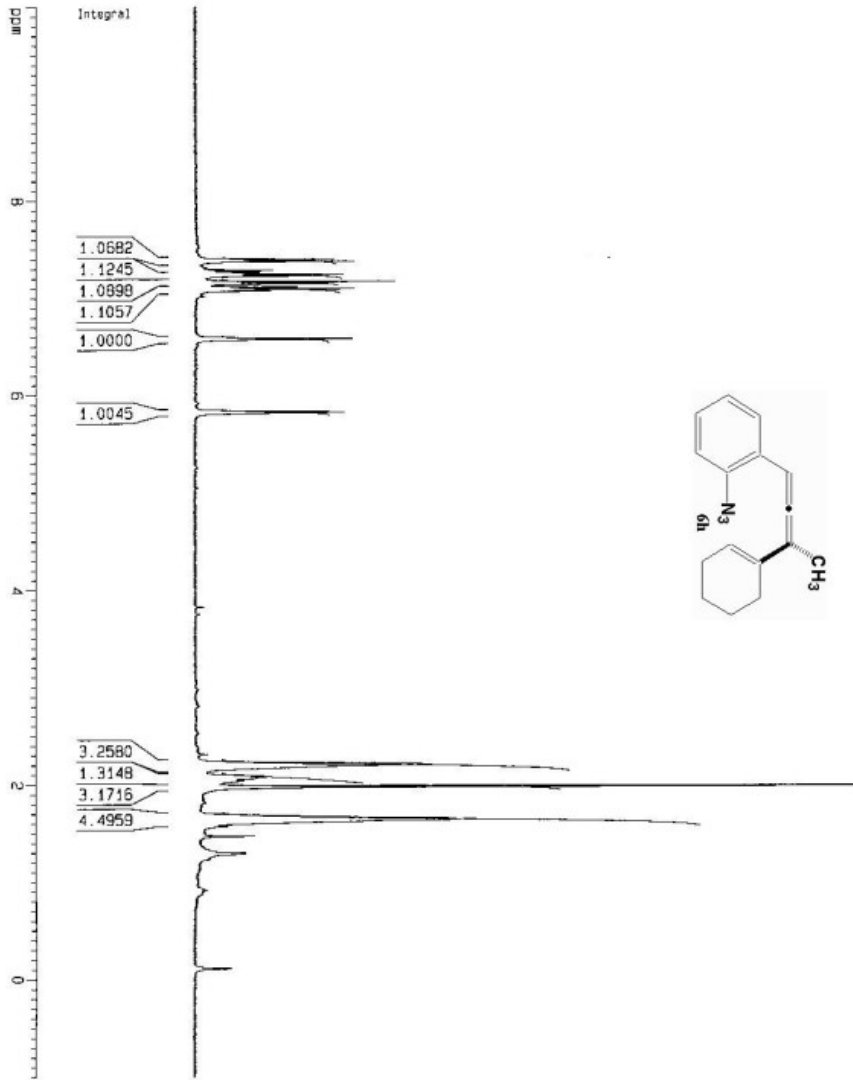

Current Data Parameters  
 NAME: M01-DEC05-05  
 EXPNO: 1  
 PROCNO: 1

F2 - Acquisition Parameters

Date\_: 20051206  
 Time: 9.27  
 INSTRUM: spect  
 PROBR0: 5 mm BBI 1H-8  
 PULPROG: zgpg30  
 TD: 65536  
 SOLVENT: DMS-D6  
 NS: 16  
 DS: 2  
 SWH: 8270.146 Hz  
 FIDRES: 0.126314 Hz  
 AQ: 3.3984243 sec  
 RG: 645.1  
 DE: 60.400 usec  
 DM: 6.00 usec  
 TE: 300.0 K  
 D1: 1.00000000 sec

\*\*\*\*\* CHANNEL f1 \*\*\*\*\*

NUC1: 1H  
 P1: 5.45 usec  
 PA: 0.00 dB  
 SF01: 400.1324710 MHz

F2 - Processing Parameters

SI: 32768  
 SF: 400.1300000 MHz  
 MDW: no  
 SSB: 0  
 LB: 0.00 Hz  
 GB: 0  
 PC: 1.00

1D NMR plot parameters

CX: 20.00 cm  
 F1P: 10.000 dB  
 F1: 4001.30 Hz  
 F2P: -1.000 dBm  
 F2: -400.13 Hz  
 FREQH: 0.550000 ppm/cw  
 HZDK: 220.07150 Hz/cm

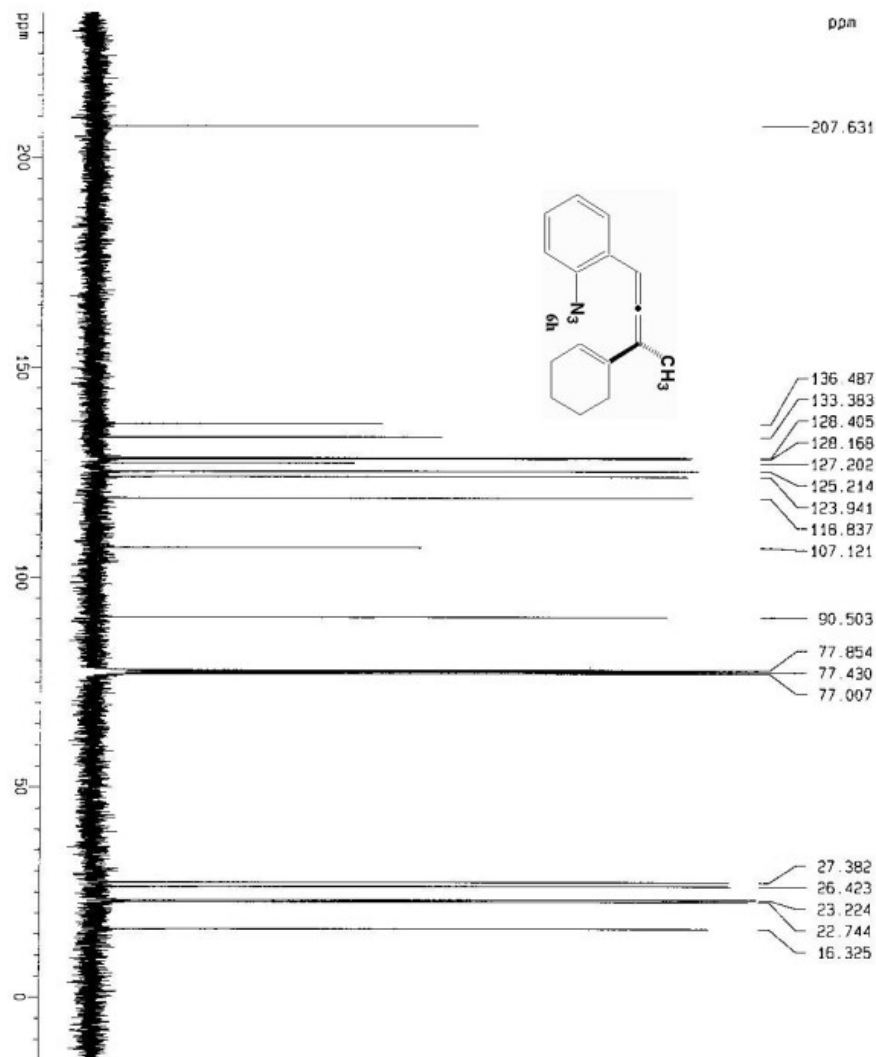

```

Current Data Parameters
Name      M1-09c04-05
EXPNO    2
PROCNO   1

F2 - Acquisition Parameters
Date_    20071208
Time     19:10
INSTRUM  spect
PROBHD   5 mm WALTZ
PULPROG  zgpg30
TD       65536
SOLVENT  CDCl3
NS       2000
DS       4
SWH      16833.363 Hz
FIDRES   0.297360 Hz
AQ       1.7400368 sec
RG       8192
DM       25.550 usec
DE       5.00 usec
TE       300.0 K
D1       2.00000000 sec
d12      0.03000000 sec
D12      0.00020000 sec

***** CHANNEL f1 *****
NUC1      13C
P1       11.80 usec
PL1      0.00 dB
SFO1     75.4762000 MHz

***** CHANNEL f2 *****
CPDPRG2  waltz16
NUC2      1H
PCPDPR2  110.00 usec
PL2       0.00 dB
PL12     17.50 dB
PL13     17.50 dB
SFO2     300.1312005 MHz

F2 - Processing parameters
SI       32768
SF       75.4677150 MHz
RG       65536
AQ       1.00 Hz
AS       0
PC       1.40

ID - NMR plot parameters
CX       30.00 cm
C1P      234.755 ppm
F1       12717.56 Hz
F2P      -20.000 ppm
PCMKCH  12.73823 ppm/c
HZCM     561.32550 Hz/cm
  
```

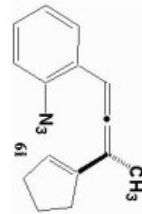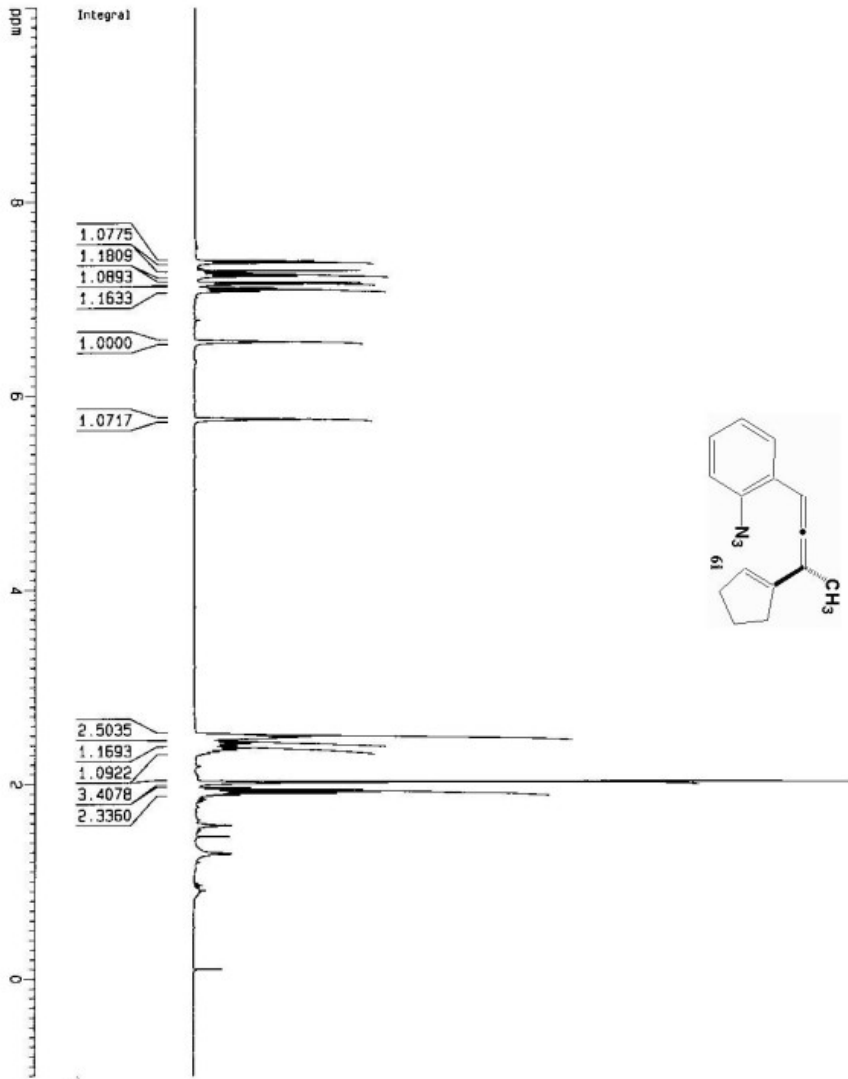

Current Data Parameters  
 NAME nfi-jun25-05  
 EXPNO 1  
 PROCNO 1

F2 - Acquisition Parameters  
 Date\_ 20050528  
 Time 13.31  
 INSTRUM spect  
 PROBRD 5 mm BBI 1H-B  
 PULPROG zg30  
 TD 65536  
 TO SOLVENT CDCl3  
 NS 16  
 DS 2  
 SWH 8278.146 Hz  
 FIDRES 0.126314 Hz  
 AQ 3.5084243 sec  
 RG 143.7  
 DM 80.400 usec  
 DE 6.00 usec  
 TE 300.0 K  
 D1 1.000000000 sec

----- CHANNEL f1 -----  
 NUC1 1H  
 P1 6.45 usec  
 PL1 0.00 dB  
 SFO1 400.1324710 MHz

F2 - Processing parameters  
 SI 32768  
 SF 400.1300000 MHz  
 WDW no  
 SSB 0  
 LB 0.00 Hz  
 GB 0  
 PC 1.00

10 NMR plot parameters  
 CX 20.00 cm  
 FIP 10.000 gpm  
 F1 4001.30 Hz  
 F2 -1.000 gpm  
 -ADD 13 Hz  
 PRPCK 0.55000 ppm/cm  
 HZCM 220.07150 Hz/cm



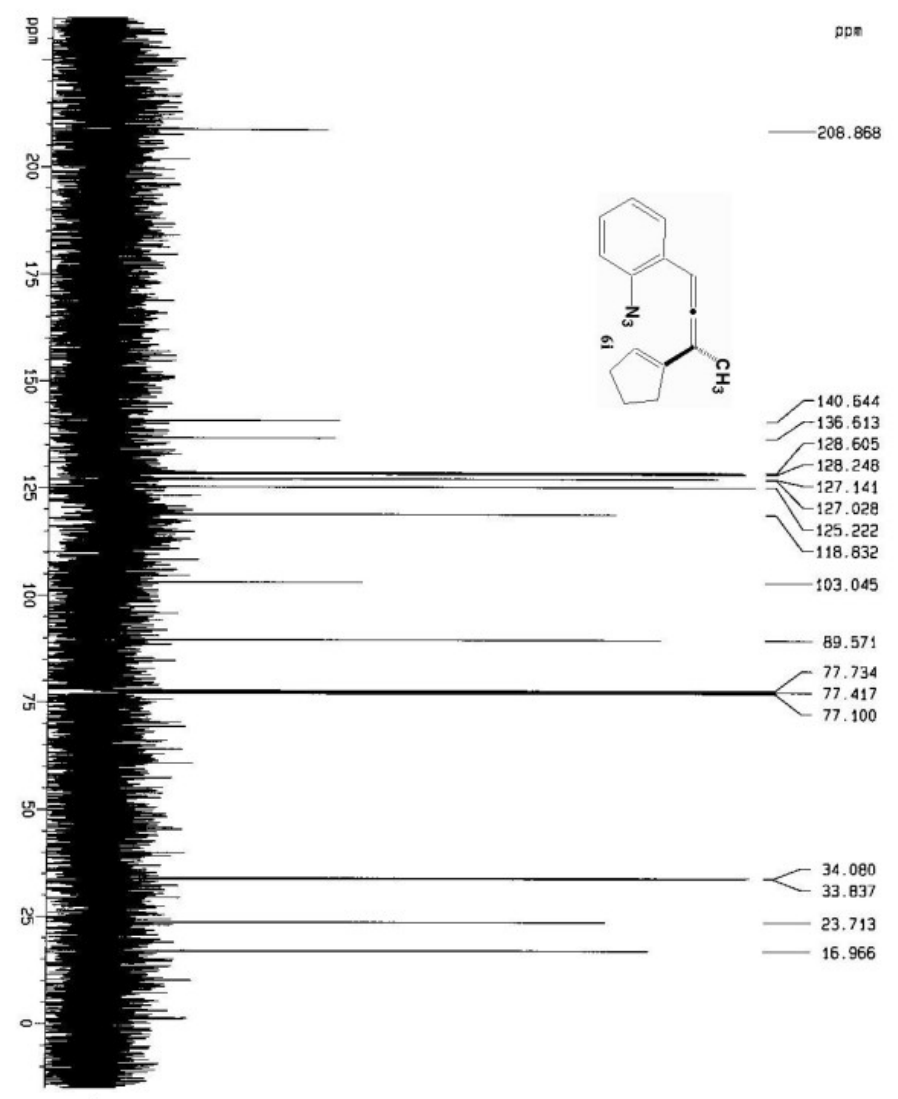

ppm

- 208.868
- 140.544
- 136.613
- 128.605
- 128.248
- 127.141
- 127.028
- 125.222
- 118.832
- 103.045
- 89.571
- 77.734
- 77.417
- 77.100
- 34.080
- 33.837
- 23.713
- 16.966

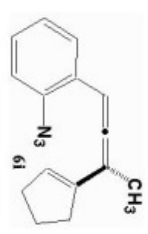

```

Current Data Parameters
NAME      W1-jun28-05
EXPNO    2
PROCNO   1

F2 - Acquisition Parameters
Date_     20050528
Time      13.45
INSTRUM   spect
PROBHD    5 mm BBI 1H-1
PULPROG   zgpg30
TD         65536
SOLVENT   DMS-d6
NS         513
DS         4
SWH        26126.629 Hz
FIDRES    0.58297 Hz
AQ         1.3045164 sec
RG         16384
DE         19.900 umsc
TE         300.2 K
D1         2.00000000 sec
d11        0.03000000 sec
d12        0.00002000 sec

***** CHANNEL f1 *****
NUC1       13C
P1         16.35 usec
PL1        -6.00 dB
SFO1       100.6277558 MHz

***** CHANNEL f2 *****
CPDPRG2   waltz16
NUC2       1H
PCPD2     114.00 usec
PL2        0.00 dB
P12       24.00 dB
P13       24.00 dB
SFO2       400.1418009 MHz

F2 - Processing parameters
SI         32768
SF         100.6172780 MHz
WDW        EM
SSB        0
LB         1.00 Hz
GB         0
PC         1.40

1D NMR plot parameters
CU         50.00 cm
F1P        234.4530 ppm
F1         238.9721 MHz
F2P        -14.046 ppm
F2         -1495.90 Hz
PRMCHN    12.46531 ppm/Hz
HZCM      1256.28137 Hz/cm
  
```

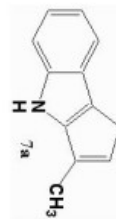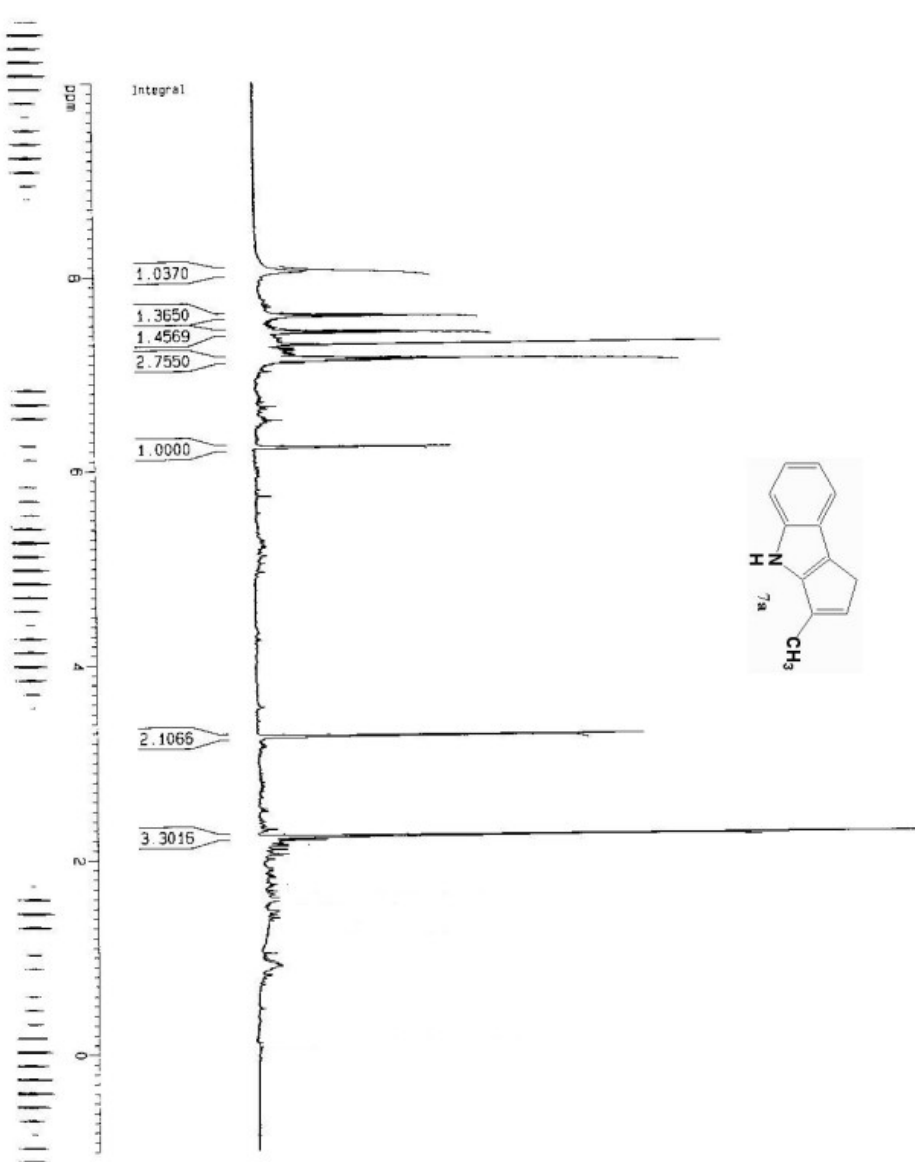

Current Data Parameters  
 NAME MRI-0820-05  
 EXPNO 1  
 PROCNO 1

F2 - Acquisition Parameters  
 Date\_ 20060120  
 Time 9:06  
 INSTRUM spect  
 PROBHD 5 mm BBI 1H-9  
 PULPROG zg30  
 TD 65536  
 SCA VENT CDD13  
 NS 16  
 DS 2  
 SWH 8278.146 Hz  
 FIDRES 0.18314 Hz  
 AQ 3.988243 sec  
 RG 322.5  
 W2 50.400 usec  
 DE 6.00 usec  
 TE 300.0 K  
 D1 1.00000000 sec

\*\*\*\*\* CHANNEL f1 \*\*\*\*\*  
 NUC1 1H  
 P1 6.45 usec  
 PL1 0.00 dB  
 SFO1 400.1324710 MHz

F2 - Processing parameters  
 SI 32768  
 SF 400.1300000 MHz  
 NQW 0  
 SSB 0  
 LB 0.00 Hz  
 GB 0

10 NMR plot parameters  
 CX 20.00 cm  
 FIP 10.000 ppm  
 F1 4001.30 Hz  
 F2P -1.000 ppm  
 F2 -400.13 Hz  
 PUNCH 0.55000 ppm/cm  
 HZCM 220.07150 Hz/cm

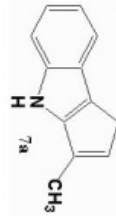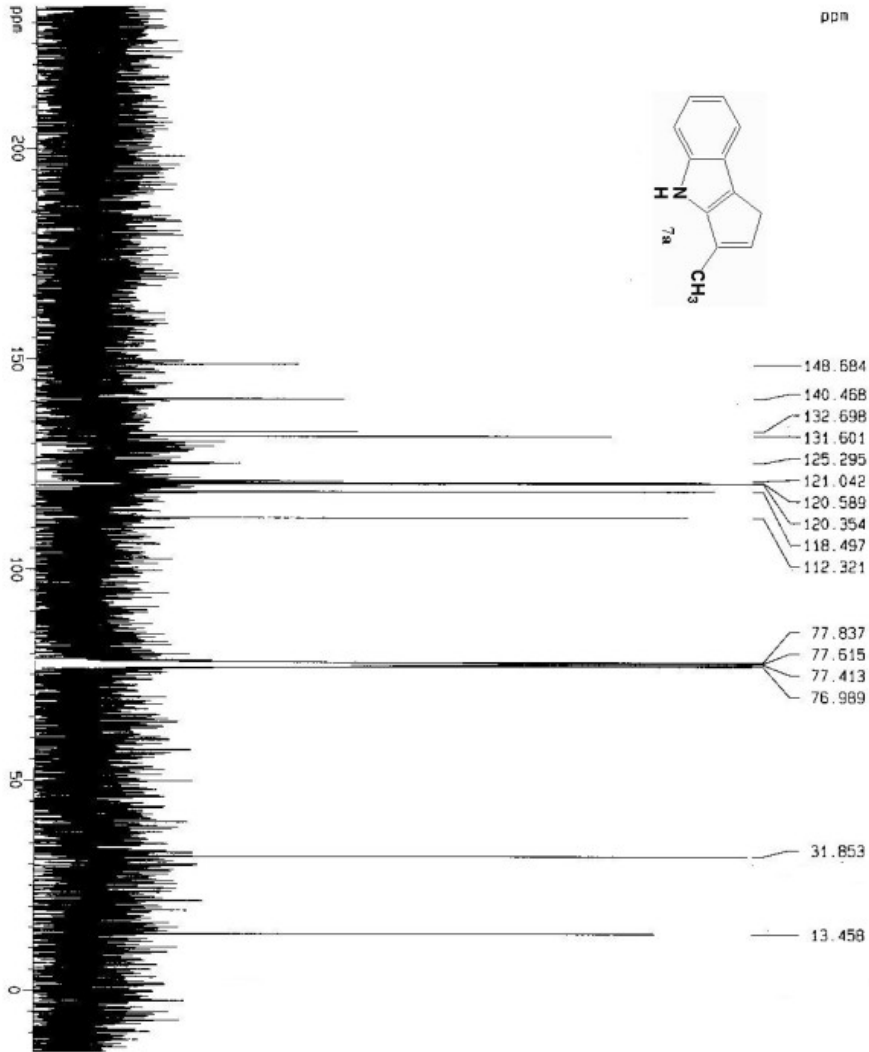

```

Current Data Parameters
NAME      MR1-Jan22-06
EXPNO    1
PROCNO   1

F2 - Acquisition Parameters
Date_    20060122
Time     17.32
INSTRUM  spect
PROBHD   5 mm QNP 1H/1
PULPROG  zgpg30
TD        65536
SOLVENT  CDCl3
NS       6737
DS       4
SWH      18796.992 Hz
FIDRES   0.286619 Hz
AQ       1.7432076 sec
RG       512
OR       76.500 uSAC
DE       6.00 uSAC
TE       300.0 K
D1       2.00000000 sec
D11      0.03000000 sec
D12      0.00020000 sec

***** CHANNEL f1 *****
NUC1      13C
P1       5.40 uSAC
PL1      -6.00 dB
SFO1     75.4106357 MHz

***** CHANNEL f2 *****
CHARGE2   MALT235
NUC2      1H
P2       115.00 uSAC
PL2      0.00 dB
SFO2     200.0000000 MHz
SFO2     299.8719995 MHz

F2 - Processing parameters
SI       32768
SF       75.4023410 MHz
WDW      EM
SSB      0
LB       1.00 Hz
GB       0
PC       1.40

1D NMR 0101 parameters
CX       30.00 cm
F1P      234.000 cm
F1       17664.75 Hz
F2P      -20.000 cm
F2       -1508.05 Hz
PNUC1M  12 70000 cm/cr
HZCM     957.60969 Hz/cm
  
```

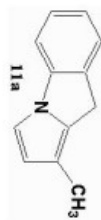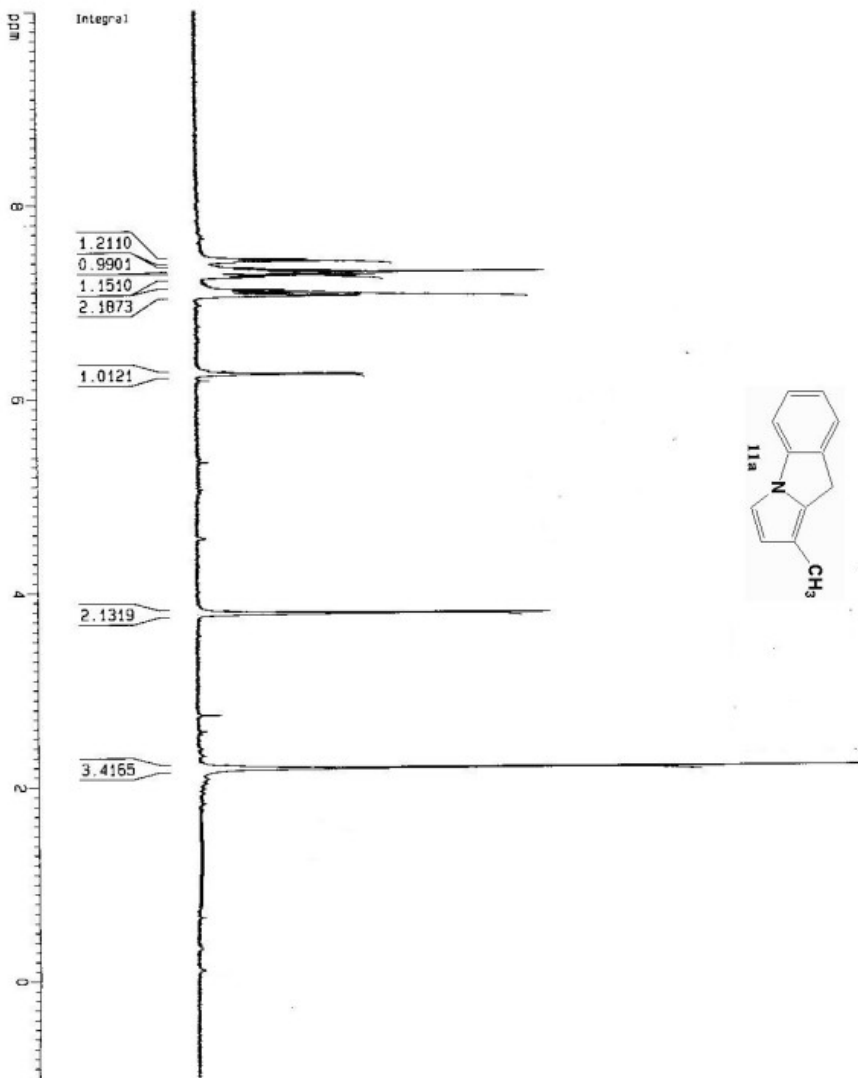

Current Data Parameters  
 NAME M1-JUN03-05  
 EXPNO 3  
 PROCNO 1

F2 - Acquisition Parameters  
 Date\_ 20050603  
 Time 20 01  
 INSTRUM spect  
 PROBS= 5 mm QNP 1H/1  
 PULPROG zg30  
 TD 65536  
 SOLVENT CDCl3  
 NS 16  
 DS 2  
 SFO1 5172.839 Hz  
 FIDRES 0.094150 Hz  
 AQ 5.3694680 sec  
 RG 724.1  
 DM 81.000 uS/cic  
 DE 6.00 uS/c  
 TE 300.0 K  
 O1 1.00000000 sec

\*\*\*\*\* CHANNEL f1 \*\*\*\*\*  
 MUX1 H1  
 P1 11.70 uS/c  
 PL1 0.00 dB  
 SFO1 299.870518 MHz

F2 - Processing parameters  
 SI 32768  
 SF 299.8705000 MHz  
 KHZ  
 MWM no  
 SSB 0  
 LB 0.00 Hz  
 GB 0  
 PC 1.00

10 NMR plot parameters  
 CX 20.00 cm  
 FIP 10.000 ppm  
 F1 2398.70 Hz  
 F2 -1.000 ppm  
 F3 -259.87 Hz  
 PUNCH 0.55000 gms/cm  
 HZCM 164.82850 Hz/cm

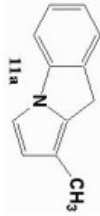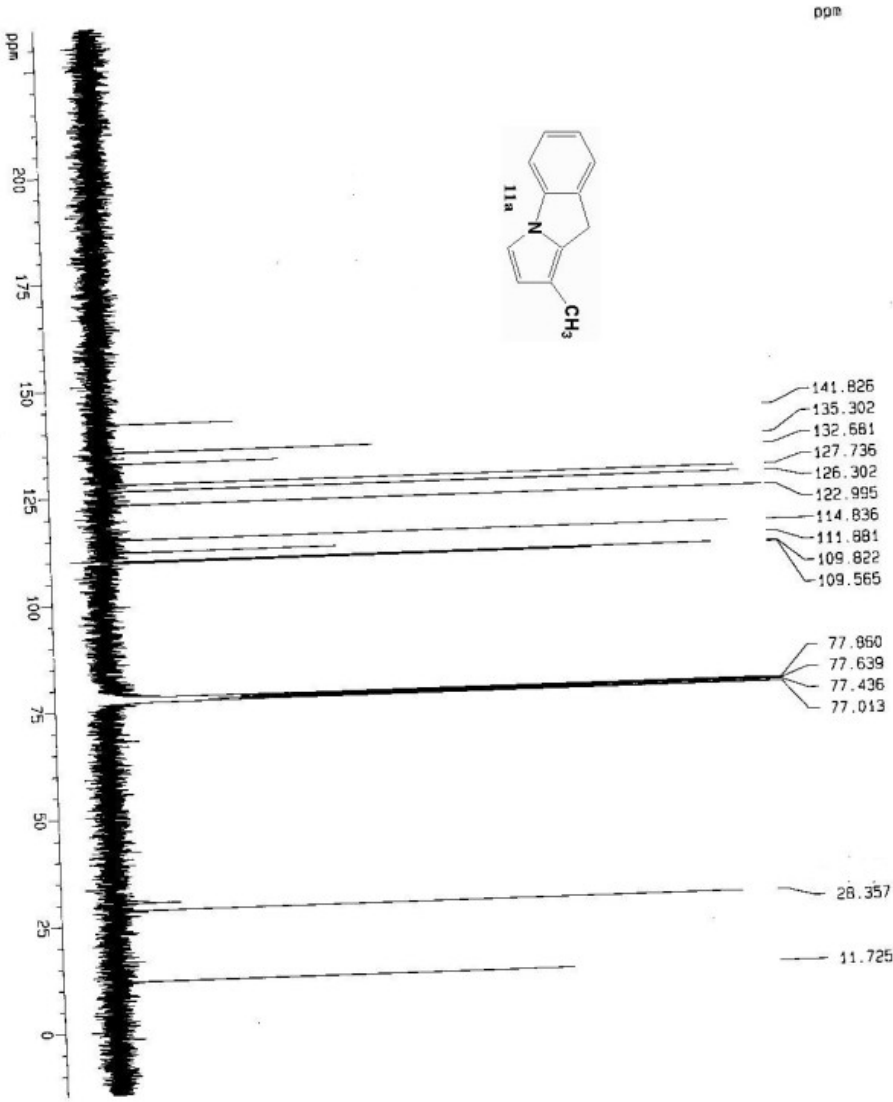

```

Current Data Parameters
NAME          M1-14a13-05
EXPNO        4
PROCNO       1

F2 - Acquisition Parameters
Date_         20030604
Time         5.36
INSTRUM      spect
PROBHD       5 mm QNP 1H/1
PULPROG      zgpg30
TD            65536
SOLVENT      CDCl3
NS           5000
DS           4
SWH           13796.592 Hz
FIDRES       0.286919 Hz
AQ           1.7453076 sec
RG           512
WB           26.600 usec
DE           300.0 K
TE           0.0000000 sec
D1           0.0000000 sec
D12          0.0000000 sec

***** CHANNEL f1 *****
NUC1          13C
P1           5.40 usec
PL           -5.00 dB
SFO1         75.410697 MHz

***** CHANNEL f2 *****
CPROG2       waltz16
NUC2          1H
P2           145.00 usec
PL2          0.00 dB
PC2         20.00 dB
PC12        20.00 dB
SFO2         298.871985 MHz

F2 - Processing parameters
SI           32768
SF           75.4023410 MHz
WDW          EM
SSB          0
LB           1.00 Hz
GB           0
PC           1.40

1D NMR plot parameters
CX           20.00 cm
F1P          234.637 ppm
F1           17982.21 Hz
F2P          -14.629 ppm
F2           -1104.78 Hz
PC1M        939.94953 Hz/cm
  
```

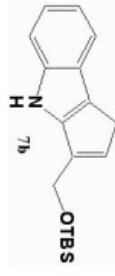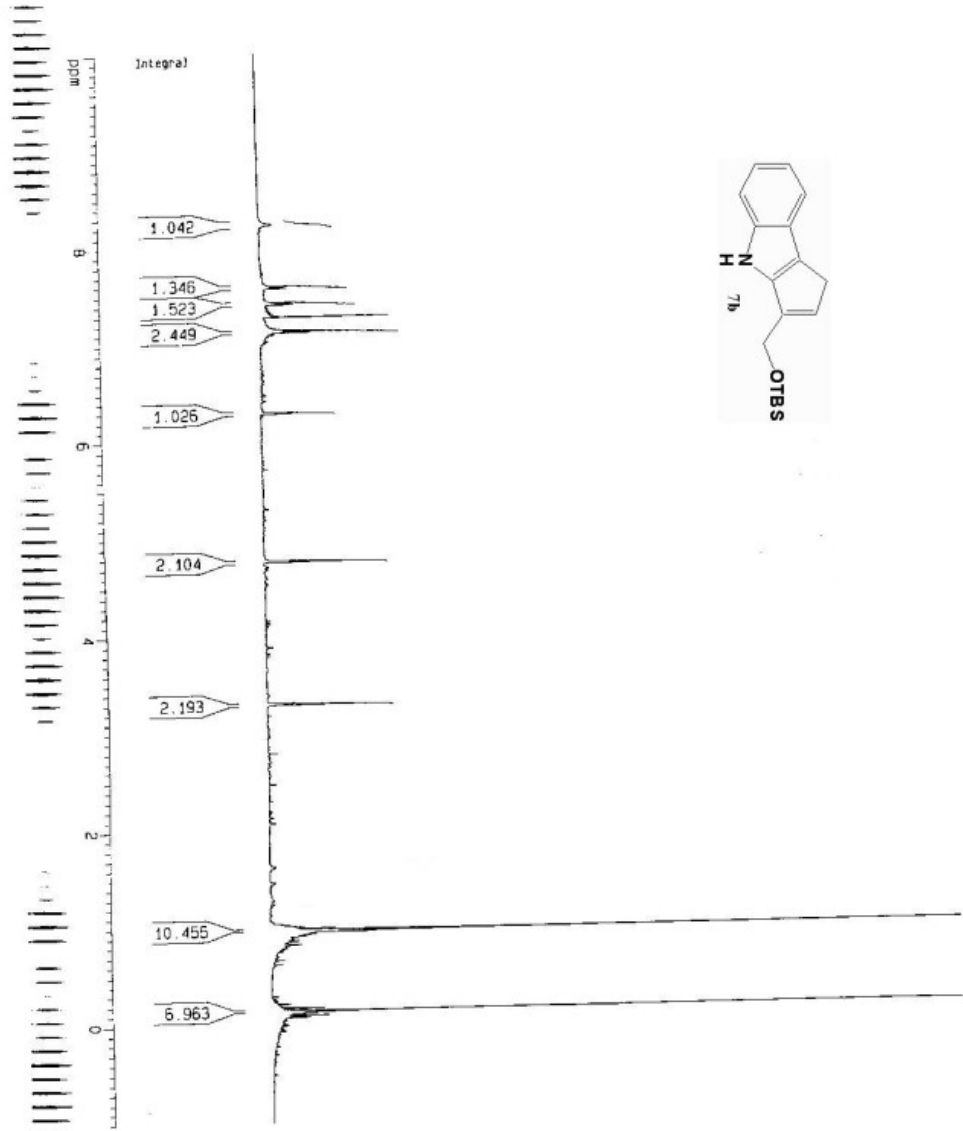

Current Data Parameters  
 NAME MRI-Jan23-05  
 EXPNO 2  
 PROCNO 1

F2 - Acquisition Parameters  
 Date\_ 20060123  
 Time 19.37  
 INSTRUM spect  
 PROBM 5 mm BBI 1H-8  
 PULPROG zgpg30  
 TD 65536  
 SOLVENT CDCl3  
 NS 16  
 DS 2  
 SWH 8278.146 Hz  
 FIDRES 0.126314 Hz  
 AQ 3.9584243 sec  
 RG 128  
 DM 60.400 usec  
 DE 6.00 usec  
 TE 300.0 K  
 D1 1.00000000 sec

\*\*\*\*\* CHANNEL f1 \*\*\*\*\*  
 NUC1 1H  
 P1 5.45 usec  
 PL1 0.00 dB  
 SFO1 400.132470 MHz

F2 - Processing parameters  
 SI 32768  
 SF 400.130000 MHz  
 MDW no  
 SSB 0  
 LB 0.00 Hz  
 GB 0  
 PC 1.00

1D NMR plot parameters.  
 CX 20.00 cm  
 F1P 10.000 ppm  
 F1 4001.30 Hz  
 F2P -1.000 ppm  
 F2 -400.13 Hz  
 FPCWID 0.55000 ppm/cw  
 HZCW 220.07150 Hz/cw

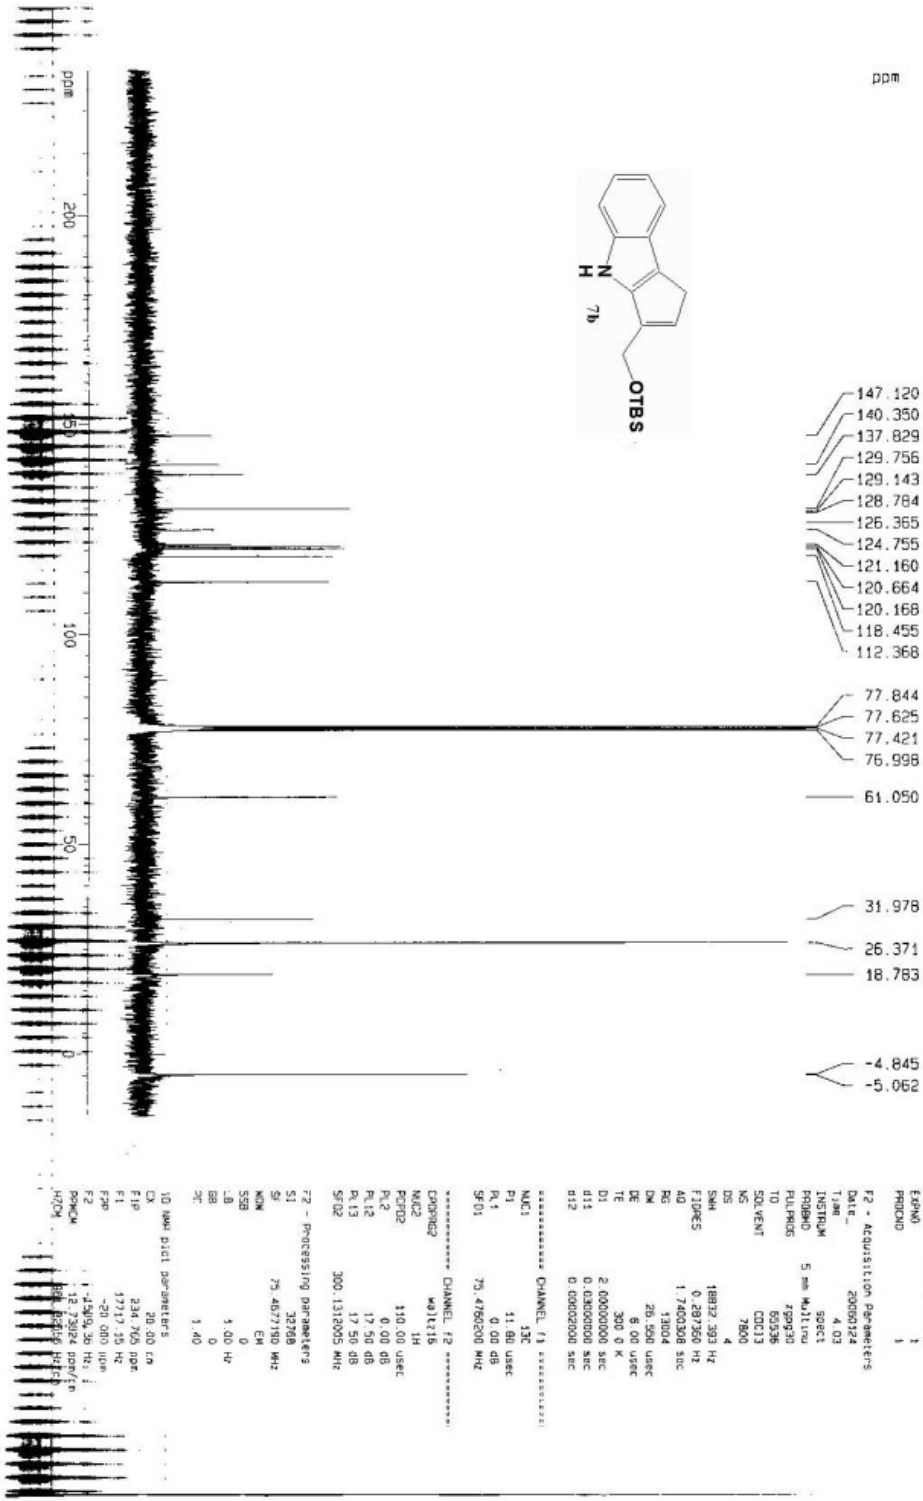

Experiment Parameters

NAME: M1-5873-08  
 EXPNO: 1  
 PROCNO: 1

F2 - Acquisition Parameters

DATE\_: 20080324  
 TIME: 14.02  
 INSTRUM: spect  
 PULPROG: zgpg30  
 FIDRES: 5.00 Hz  
 SFO1: 125.762 MHz  
 SOLVENT: CDCl3  
 NS: 7800  
 DS: 4  
 SWH: 18832.393 Hz  
 FIDRES: 0.287560 Hz  
 AQ: 1.7400308 sec  
 RG: 13004  
 DM: 28.500 usec  
 DE: 6.00 usec  
 TE: 300.0 K  
 D1: 2.00000000 sec  
 D11: 0.03000000 sec  
 D12: 0.00000000 sec

CHANNEL f1

MUCL: 13C  
 P1: 11.80 usec  
 PL1: 0.00 dB  
 SF01: 75.4760200 MHz

CHANNEL f2

CPDPRG2: waltz16  
 NUCL2: 1H  
 PULPROG2: zgpg30  
 PC2: 0.00 usec  
 PL2: 0.00 dB  
 PL12: 17.50 dB  
 PL13: 17.50 dB  
 SFO2: 300.1310005 MHz

F2 - Processing parameters

SF: 300.1310005 MHz  
 WHW: 75.4677150 MHz  
 EQ: 0  
 SSB: 0  
 GB: 1.00 Hz  
 SC: 1.40

10 user def parameters

CX: 20.00 Hz  
 F1P: 234.765 ppm  
 F1: 17117.15 Hz  
 FAP: -20.000 ppm  
 F2: -12500.36 Hz  
 POSPCW: -18.23000 ppm/Hz  
 HZCW: 18.23000 Hz

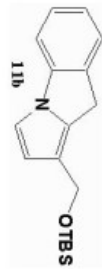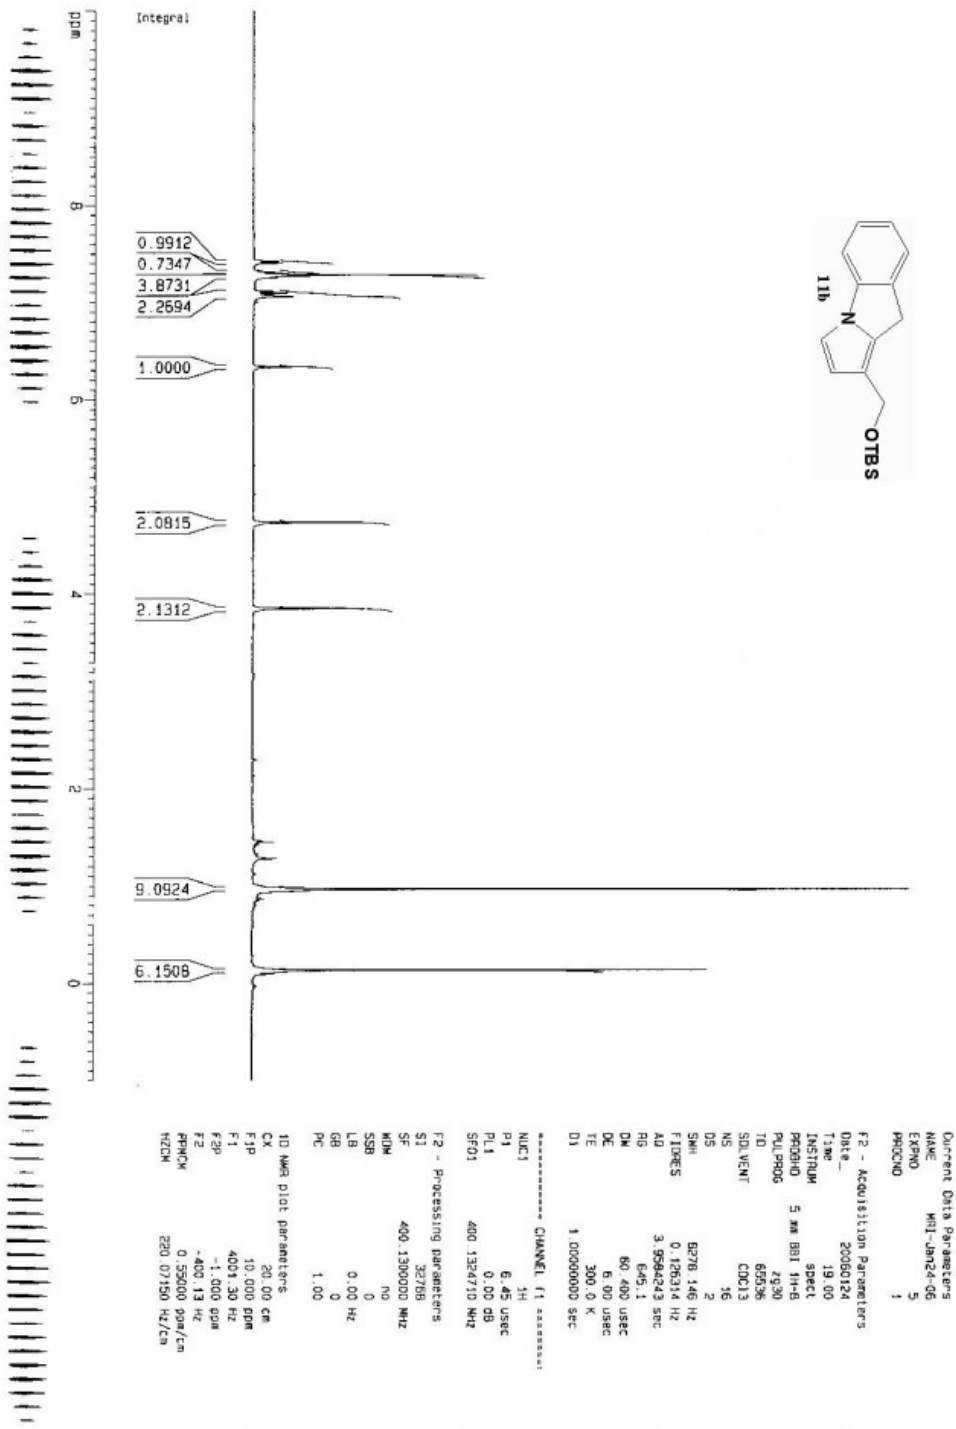



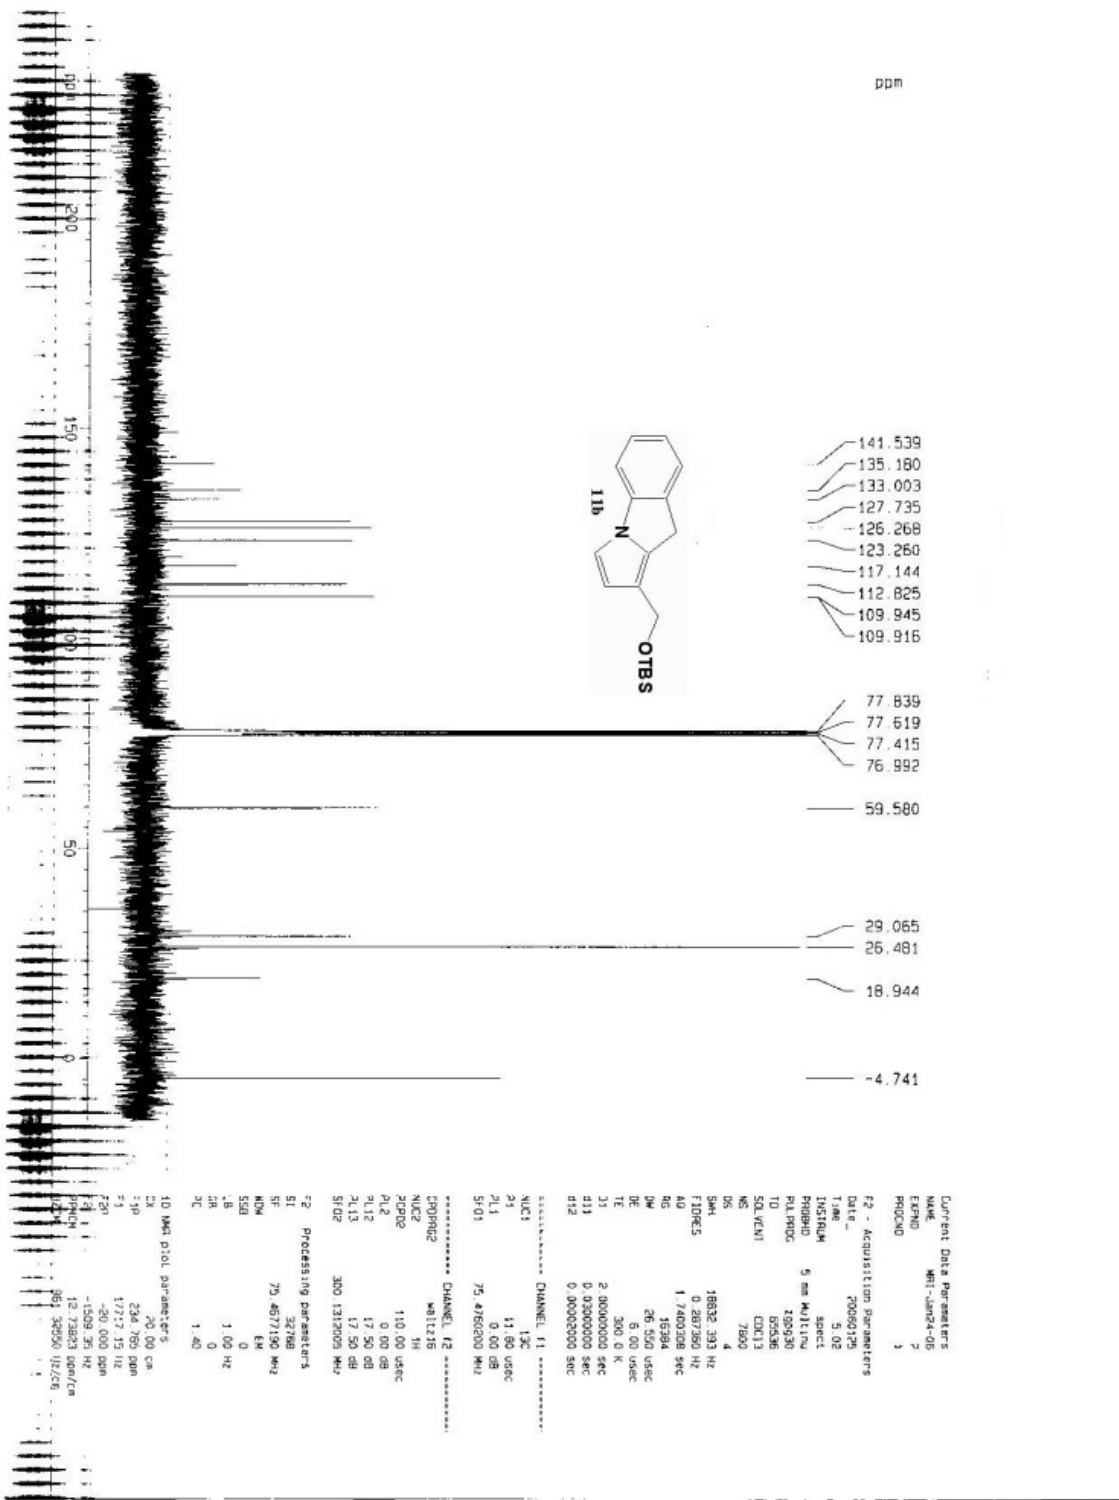

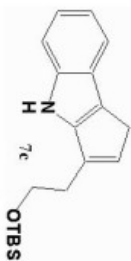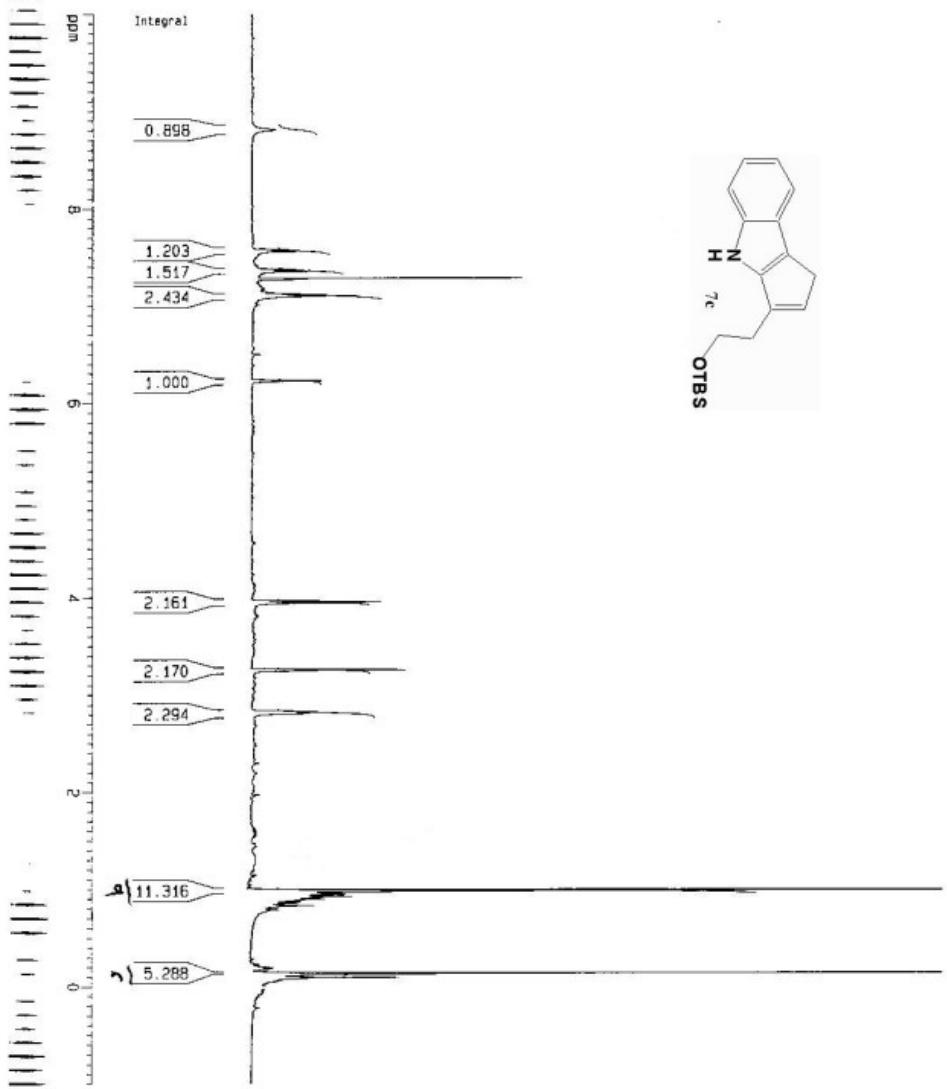

Current Data Parameters  
 NAME: NRI-Jan21-06  
 EXPNO: 3  
 PROCNO: 1

F2 - Acquisition Parameters  
 Date\_: 20060121  
 Time: 11:19  
 INSTRUM: spect  
 PROBHD: 5 mm BBI 1H-8  
 PULPROG: zg30  
 TO: 65536  
 SOLVENT: DMS-D3  
 NS: 16  
 DS: 2  
 SWH: 8278.140 Hz  
 FIDRES: 0.128314 Hz  
 AQ: 3.9596243 sec  
 RG: 228.1  
 DW: 80.400 usec  
 DE: 5.00 usec  
 TE: 300.0 K  
 D1: 1.00000000 sec

\*\*\*\*\* CHANNEL f1 \*\*\*\*\*  
 NUC1: 1H  
 P1: 6.45 usec  
 PL1: 0.00 dB  
 SFO1: 400.1326710 MHz

F2 - Processing parameters  
 SI: 32768  
 SF: 400.1300000 MHz  
 KW: no  
 SSB: 0  
 LB: 0.00 Hz  
 GB: 0  
 PC: 1.00

1D NMR plot parameters.  
 CX: 20.00 cm  
 FJP: 10.000 DPM  
 F1: 4001.30 Hz  
 F2: -400.13 Hz  
 PPMCK: 0.58000 ppm/cm  
 NZCM: 220.07150 Hz/cm

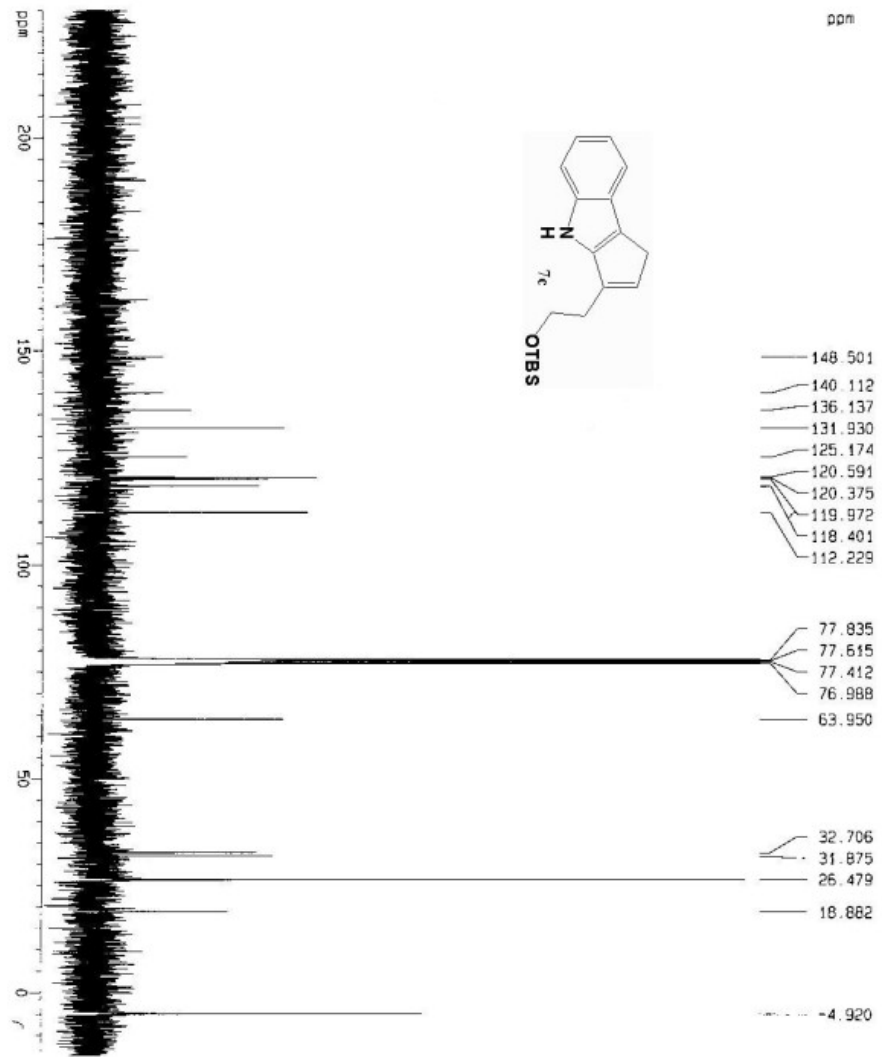

- 148.501
- 140.112
- 136.137
- 131.930
- 125.174
- 120.591
- 120.375
- 119.972
- 118.401
- 112.229
- 77.835
- 77.615
- 77.412
- 76.988
- 63.950
- 32.706
- 31.875
- 26.479
- 18.882
- 4.920

```

Current Data Parameters
NAME      MFL-3621-00
EXPNO     1
PROCNO    1
----- F2 - Acquisition Parameters -----
Date_     20060123
Time      16.42
INSTRUM   spect
PROBHD    5 mm DNP-HU/1
PULPROG   zgpg30
TD         65536
SOLVENT   CDCl3
NS         4000
DS         4
SWH        18796.992 Hz
FIDRES     0.268119 Hz
AQ         1.7433776 sec
RG         256
OR         26.600 usec
DE         6.00 usec
TE         300.0 K
D1         2.00000000 sec
D11        0.03000000 sec
D12        0.00002000 sec
----- CHANNEL f1 -----
NUC1       13C
P1         5.40 usec
PL1        -6.00 dB
SFO1       75.410657 MHz
----- CHANNEL f2 -----
CPDPRG2   waltz16
NUC2       1H
P2         115.00 usec
PL2        0.00 dB
PL12       20.00 dB
PL13       20.00 dB
SFO2       298.871995 MHz
----- F3 - Processing Parameters -----
SI         32768
SF         75.402340 MHz
WDW         EM
SSB         0
LB         1.00 Hz
GB         0
PC         1.40
----- 1D NMR plot parameters -----
CX         20.00 cm
FLP        230.000 gpm
FL         17342.54 Hz
FAP        -20.000 gpm
F2         -1506.05 Hz
PPMACH     12.50000 ppm/cm
HZCM       942.58320 Hz/cm
  
```

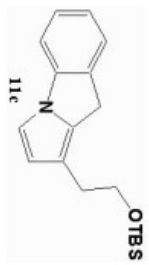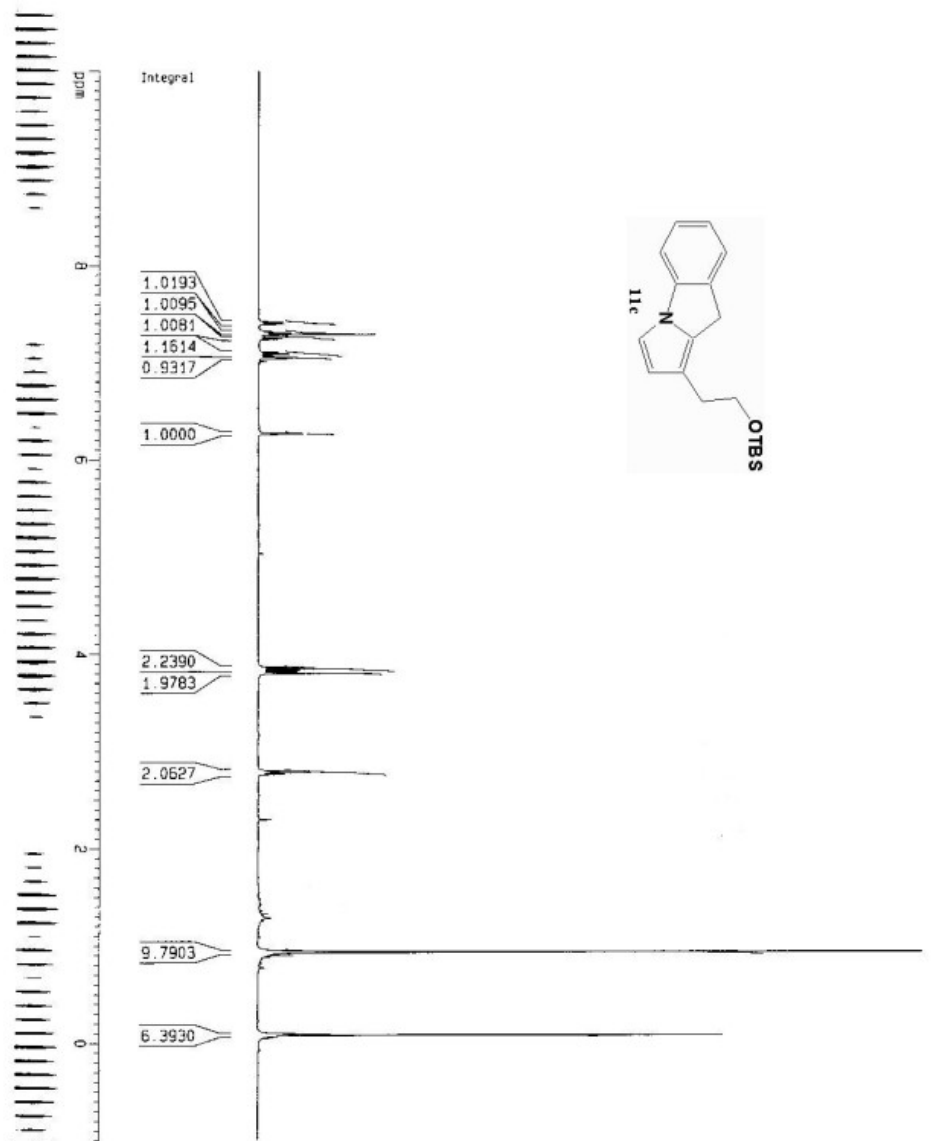

Current Data Parameters  
 Name MRI-JAN24-05  
 EXPNO 4  
 PROCNO 1

F2 - Acquisition Parameters  
 Date\_ 20050124  
 Time 16.52  
 INSTRUM spect  
 PNOBHD 5 mm BBI JH-9  
 PULPROG zg30  
 TD 65536  
 SOLVENT CDCl3  
 NS 11  
 DS 2  
 SWH 8278.146 Hz  
 FIDRES 0.186314 Hz  
 AQ 3.9594243 sec  
 RG 256  
 DM 60.400 usec  
 DE 6.00 usec  
 TE 300.0 K  
 D1 1.00000000 sec

\*\*\*\*\* CHANNEL f1 \*\*\*\*\*  
 NUC1 1H  
 P1 6.45 usec  
 PL1 0.00 dB  
 SFO1 400.1324710 MHz

F2 - Processing parameters  
 SI 32768  
 SF 400.1300000 MHz  
 KW no  
 SSB 0  
 LB 0.00 Hz  
 GB 0  
 PC 1.00

10 MHz plot parameters  
 CX 20.00 cm  
 FIP 10.000 ppm  
 F1 4001.30 Hz  
 F2P -1.000 ppm  
 F2 -400.13 Hz  
 PPHZ 0.55000 ppm/cm  
 MZCM 220.0/150 Hz/cm

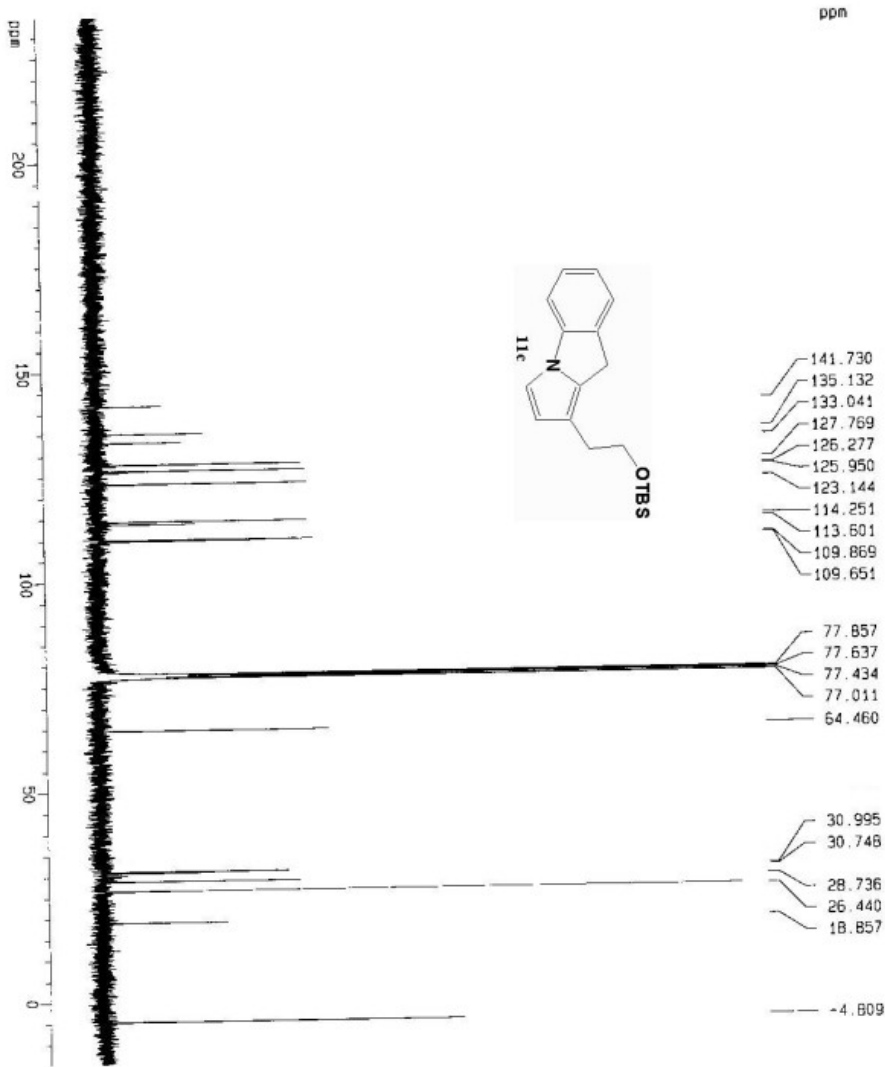

```

Current Data Parameters
NAME      MRI-Jan24-06
EXPNO    2
PROCNO   1

F2 - Acquisition Parameters
Date_    20080125
Time     5.05
INSTRUM  spect
PROBHD   5 mm QNP 1H/1
PULPROG  zgpg30
TD        65536
SOLVENT  CDCl3
NS        7500
DS        4
SMH       18750.592 Hz
FIDRES    0.288819 Hz
AQ         1.7432076 sec
RG         512
DE         28.800 uVsec
TE         300.0 K
D1         2.00000000 sec
D12        0.03000000 sec
D122       0.00002000 sec

***** CHANNEL f1 *****
NUC1       13C
P1         5.00 uVsec
PL1        -8.00 dB
SFO1       75.4109397 MHz

***** CHANNEL f2 *****
CPROG2    waltz16
NUC2       1H
P2         115.00 uVsec
PL2        0.00 dB
R12        20.00 dB
R122       20.00 dB
SFO2       299.8711995 MHz

F2 - Processing parameters
SI         32768
SF         75.4023410 MHz
KOH        EM
SSB        0
LB         1.00 Hz
GB         0
PC         1.40

10 MHz plot parameters
CX         20.00 cm
F1P        234.863 ppm
F1         17693.24 Hz
F2P        -20.000 ppm
F2         -1508.00 Hz
FREQH0     12.73255 ppm/cM
HZ0M       950.08433 Hz/cM
  
```

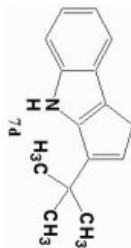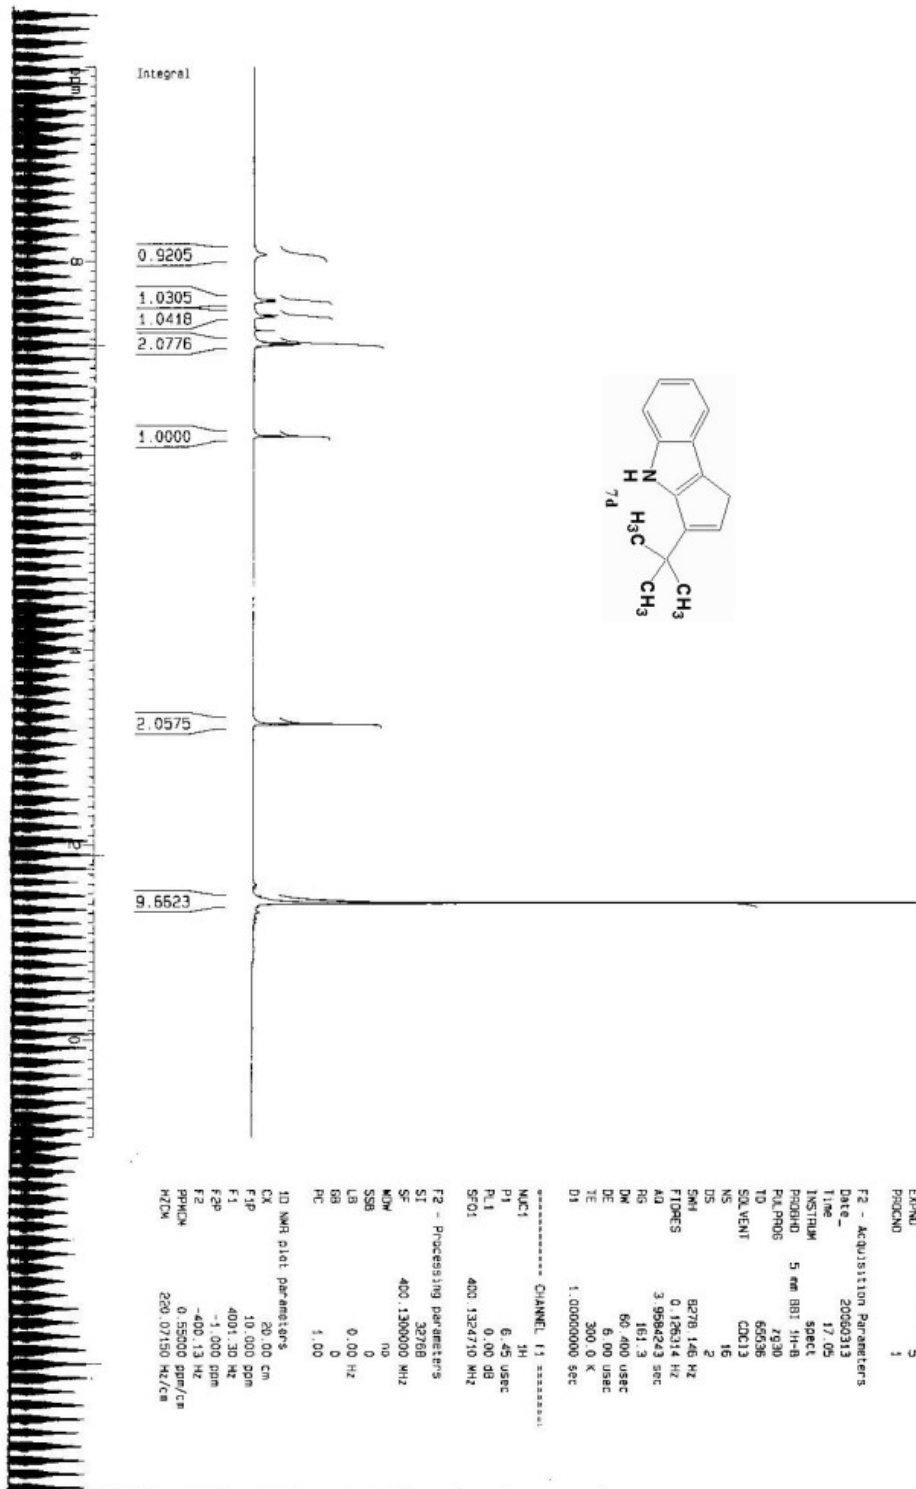

Current Data Parameters  
 NAME MRI-MR13-06  
 EXPNO 5  
 PROCNO 1

F2 - Acquisition Parameters  
 Date\_ 20060313  
 Time 17.05

INSTRUM spect  
 PULPROG 5 mm BBI 1H-B  
 PULPROG 7d30

SOLVENT CDCl3  
 NS 16  
 US 2

SMH 8278.146 Hz  
 FIDRES 0.126314 Hz  
 AQ 3.9564243 sec

RG 161.3  
 DM 60.400 usec  
 DE 6.00 usec

TE 300.0 K  
 D1 1.00000000 sec

----- CHANNEL f1 -----  
 NUC1 1H  
 P1 6.45 usec  
 PL1 0.00 dB  
 SFO1 400.1324710 MHz

F2 - Processing parameters  
 SI 32768  
 SF 400.1300000 MHz  
 WDW no  
 SSB 0

LB 0.00 Hz  
 GB 0  
 PC 1.00

ID NMR plot parameters  
 CX 20.00 cm  
 FXP 10.000 gpm  
 F1 4001.30 Hz  
 F2P -1.000 ppm  
 F2 -400.13 Hz  
 PPM1CM 0.55000 ppm/cm  
 MTCM 220.07150 Hz/cm

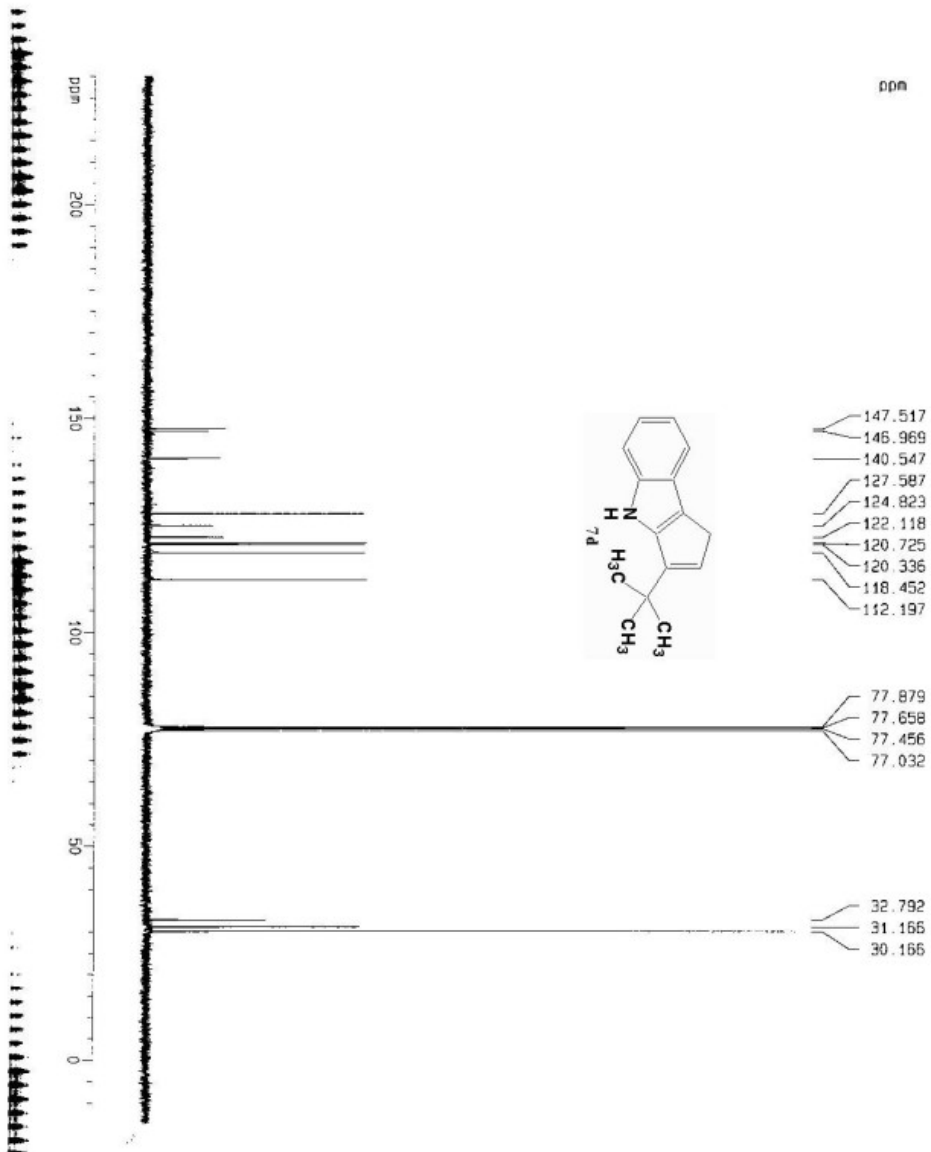

Current Data Parameters  
 NAME: M07-MR-14-06  
 EXPNO: 2  
 F2ID: 1  
 F2 - Acquisition Parameters  
 Date\_: 20080314  
 Time: 17:00  
 INSTRUM: spect  
 PROBHD: 5 mm DNP HX/1  
 PULPROG: zgpg30  
 TO: E5536  
 SOLVENT: CDCl3  
 NS: 1637  
 DS: 4  
 SMH: 18796.592 Hz  
 FIDRES: 0.266819 Hz  
 AQ: 1.7433076 sec  
 RG: 512  
 DM: 28.600 usec  
 DE: 6.00 usec  
 TE: 300.0 K  
 D1: 2.00000000 sec  
 D12: 0.05000000 sec  
 D12: 0.00002000 sec

\*\*\*\*\* CHANNEL f1 \*\*\*\*\*  
 NUC1: 13C  
 P1: 5.40 usec  
 PL1: -6.00 dB  
 SFO1: 75.410657 MHz

\*\*\*\*\* CHANNEL f2 \*\*\*\*\*  
 CPDPRG2: waltz16  
 NUC2: 1H  
 P2: 115.00 usec  
 PL2: 0.00 dB  
 PL12: 20.00 dB  
 PL13: 20.00 dB  
 SFO2: 299.8711999 MHz

F2 - Processing parameters  
 SI: 32768  
 SF: 75.4023410 MHz  
 WHW: EM  
 SSB: 0  
 LB: 1.00 Hz  
 GB: 0  
 PC: 1.40

10 NMR plot parameters  
 EX: 20.00 cm  
 F1P: 230.000 ppm  
 F1: 17342.54 Hz  
 F2P: -20.000 ppm  
 F2: -1508.09 Hz  
 PPMCH: 12.50000 ppm/cm  
 SCA2: 52930 Hz/cm

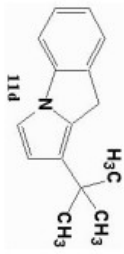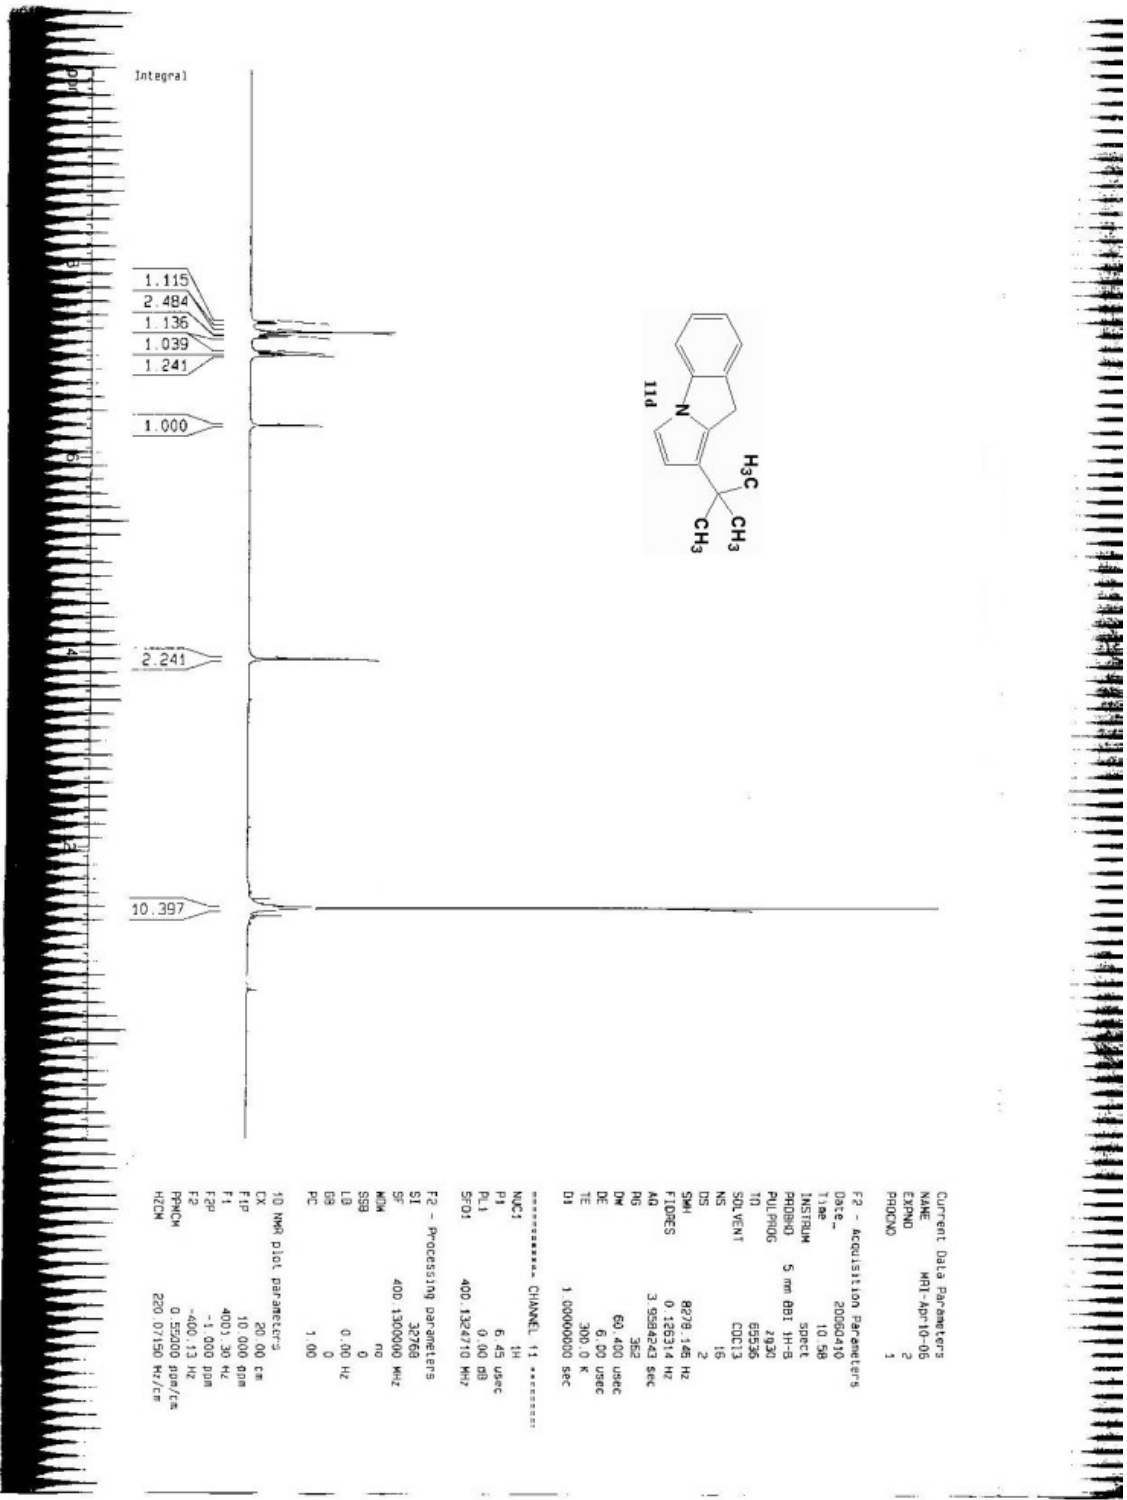

Current Data Parameters  
 NAME MRI-APR10-06  
 EXPNO 2  
 PROCNO 1

F2 - Acquisition Parameters  
 Date\_ 20060410  
 Time 10.58

INSTRUM spect  
 PROBHD 5 mm BBI 1H-3  
 PULPROG zgpg30

TD 65536  
 SOLVENT CDCl3  
 NS 16  
 DS 2

SWH 8278.145 Hz  
 FIDRES 0.126314 Hz  
 AQ 3.9584243 sec

RG 382  
 DW 60.400 usec  
 DE 6.00 usec  
 TE 300.0 K

D1 1.00000000 sec

\*\*\*\*\* CHANNEL f1 \*\*\*\*\*  
 NUC1 1H  
 P1 6.43 usec  
 PL1 0.00 dB  
 SFO1 400.1364710 MHz

F2 - Processing parameters  
 SI 32768  
 SF 400.1300000 MHz  
 KW 64  
 SSB 0  
 LB 0.00 Hz  
 GB 0  
 PC 1.00

1D NMR plot parameters  
 CX 20.00 cm  
 FIP 10.000 GHz  
 F1 4003.30 Hz  
 F2 -1.000 ppm  
 F2 -400.13 Hz  
 PRNCK 0.55200 ppm/cm  
 HZCM 220.07150 Hz/cm



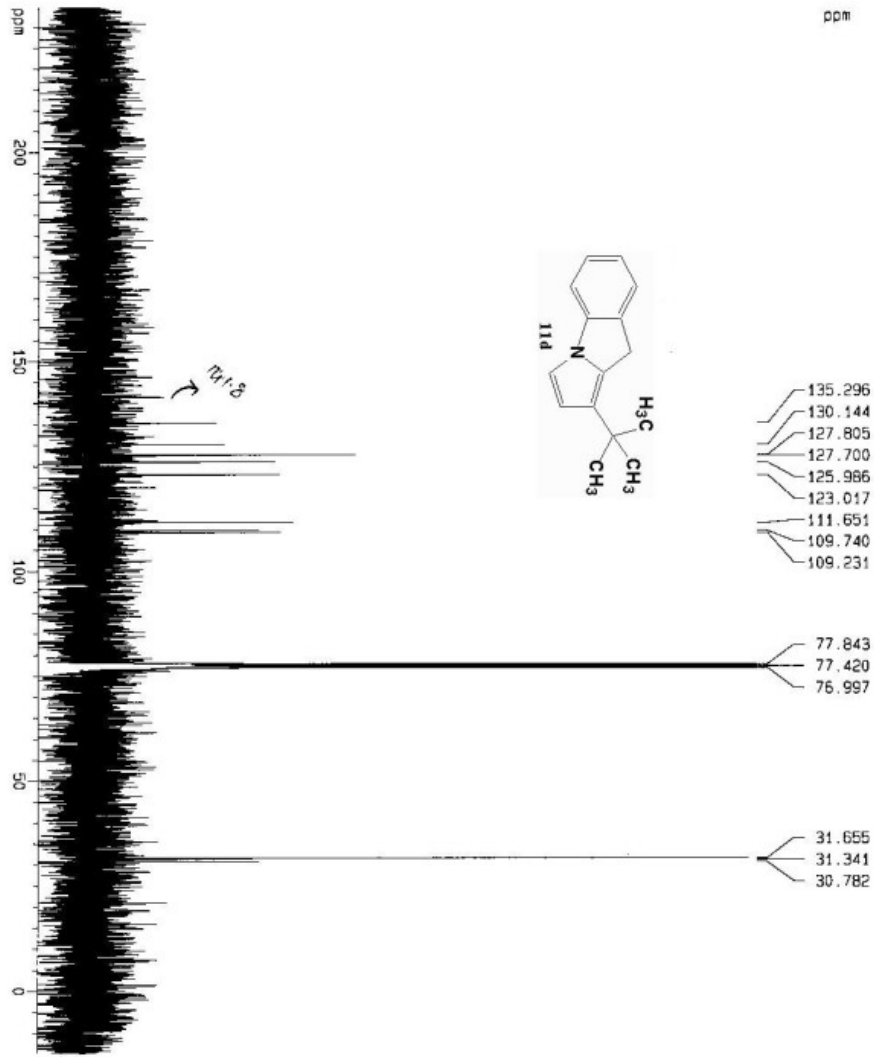

```

Current Data Parameters
NAME      W11-30r10-06
EXPNO    1
PROCNO   1

F2 - Acquisition Parameters
Date_    20050410
Time     23:45
INSTRUM  spect
PROBHD   5 mm WALTZ
PULPROG  zgpg30
TD       65536
SFO1     125.760 MHz
SOLVENT  CDCl3
NS       3754
DS       4
SWH      19832.393 Hz
FIDRES   0.2807360 Hz
AQ       1.7400000 sec
RG       16384
DE       26.7500 usec
TE       300.0 K
D1       2.00000000 sec
d11      0.03000000 sec
d12      0.00000000 sec

----- CHANNEL f1 -----
NUC1     13C
P1       11.80 usec
PL1      0.00 dB
SFO1     75.4760200 MHz

----- CHANNEL f2 -----
CPDPRG2  waltz16
NUC2     1H
P2       110.00 usec
PL2      0.00 dB
PL12     17.50 dB
PL13     17.50 dB
SFO2     300.1312005 MHz

F2 - Processing parameters
SI       32768
SF       75.4677190 MHz
WDW      EM
SSB      0
LB       1.00 Hz
GB       0
PC       1.40

10 NMR P102 parameters:
CV       20.00 cm
F1P      234.785 ppm
F1       127.1716 Hz
F2P      -20.000 ppm
F2       -1519.98 Hz
P0MCHM  12.73124 ppm/cm
HZCM     951.26756 Hz/cm
  
```

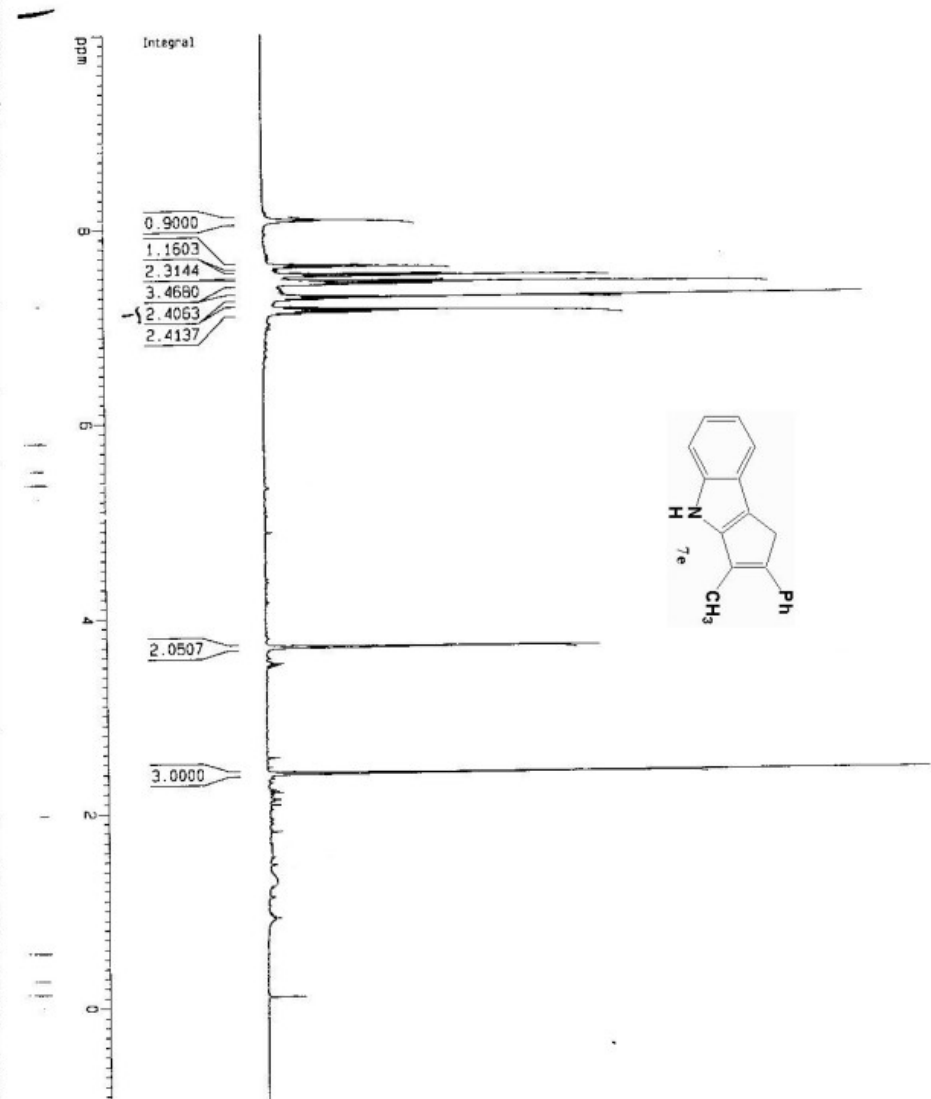

Current Data Parameters  
 NAME: M01-Jan09-06  
 EXPNO: 1  
 PROCNO: 1

F2 - Acquisition Parameters  
 Date\_: 20060108  
 Time: 11:46  
 INSTRUM: spect  
 PROBR4: 5 mm BBI 1H-B  
 PULPROG: zg30  
 TD: 65536  
 SOLVENT: CDCl3  
 NS: 16  
 DS: 2  
 SWH: 6278.146 Hz  
 FIDRES: 0.126314 Hz  
 AQ: 3.5984243 sec  
 RG: 287.4  
 DW: 60.400 usec  
 DE: 6.00 usec  
 TE: 300.0 K  
 D1: 1.00000000 sec

\*\*\*\*\* CHANNEL f1 \*\*\*\*\*  
 NUCL1: 1H  
 P1: 6.45 usec  
 PL1: 0.00 dB  
 SF01: 400.1324710 MHz

F2 - Processing Parameters  
 SI: 32768  
 SF: 400.1300000 MHz  
 KW: no  
 SSB: 0  
 LB: 0.00 Hz  
 GB: 0  
 PC: 1.00

1D NMR plot parameters  
 CX: 20.00 cm  
 F1P: 10.000 ppm  
 F1: 4001.30 Hz  
 F2P: -1.000 ppm  
 F2: -400.13 Hz  
 PPM2H: 0.59300 ppm/cm  
 HZCM: 220.07150 Hz/cm

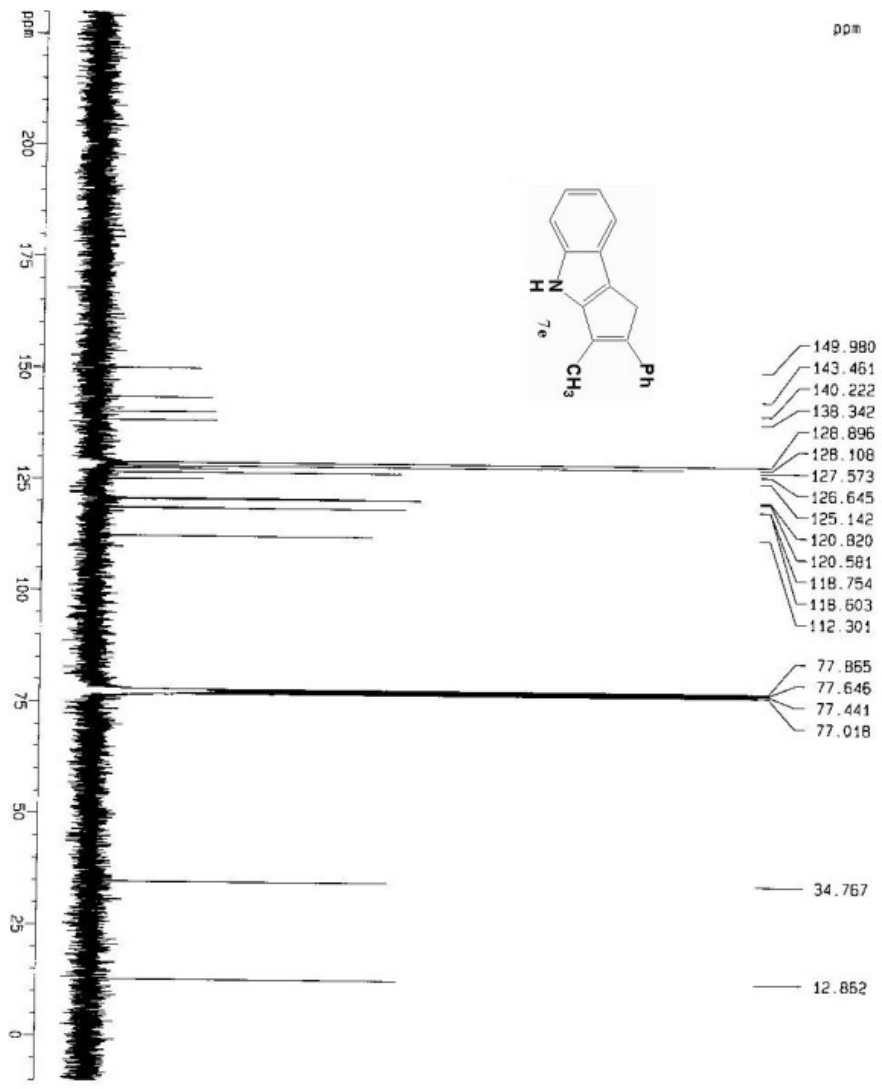

- 149.980
- 143.461
- 140.222
- 138.342
- 128.896
- 128.108
- 127.573
- 126.645
- 125.142
- 120.820
- 120.581
- 118.754
- 118.603
- 112.301
- 77.865
- 77.646
- 77.441
- 77.018

- 34.767
- 12.852

```

Current Data Parameters
NAME      M01-JAN07-06
EXPNO    9
PROCNO   1

F2 - Acquisition Parameters
Date_    20060108
Time     1.47
INSTRUM  spect
PROBHD   5 mm QNP 1H/1
PULPROG  zgpg30
TD        65536
SOLVENT  DMS-D6
NS        4096
DS        4
SWH       18795.992 Hz
FIDRES   0.298819 Hz
AQ        1.7432976 sec
RG         2048
AQ        0.6000000 sec
TE        300.0 K
DE        6.00 uS/cm
D1         2.0000000 sec
D11        0.0200000 sec
D12        0.0000000 sec

***** CHANNEL f1 *****
NUC1      13C
P1         5.40 uS/cm
PL1       -6.00 dB
SFO1      75.418357 MHz

***** CHANNEL f2 *****
CPDPRG2  waltz16
NUC2      1H
PCPD2     115.00 uS/cm
PL2        0.00 dB
PL12       20.00 dB
PL13       20.00 dB
SFO2      285.871995 MHz

F2 - Processing Parameters
SI         32768
SF         75.4023410 MHz
WDW        EM
SSB        0
LB         1.00 Hz
GB         0
PC         1.40

10 NMR tick parameters
CX         20.00 cm
F1P        230.000 GHz
F2P        17342.54 Hz
F3P        -1754.02 Hz
P1P        12.00000 GHz/cm
P2P        504.82612 Hz/cm
  
```

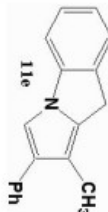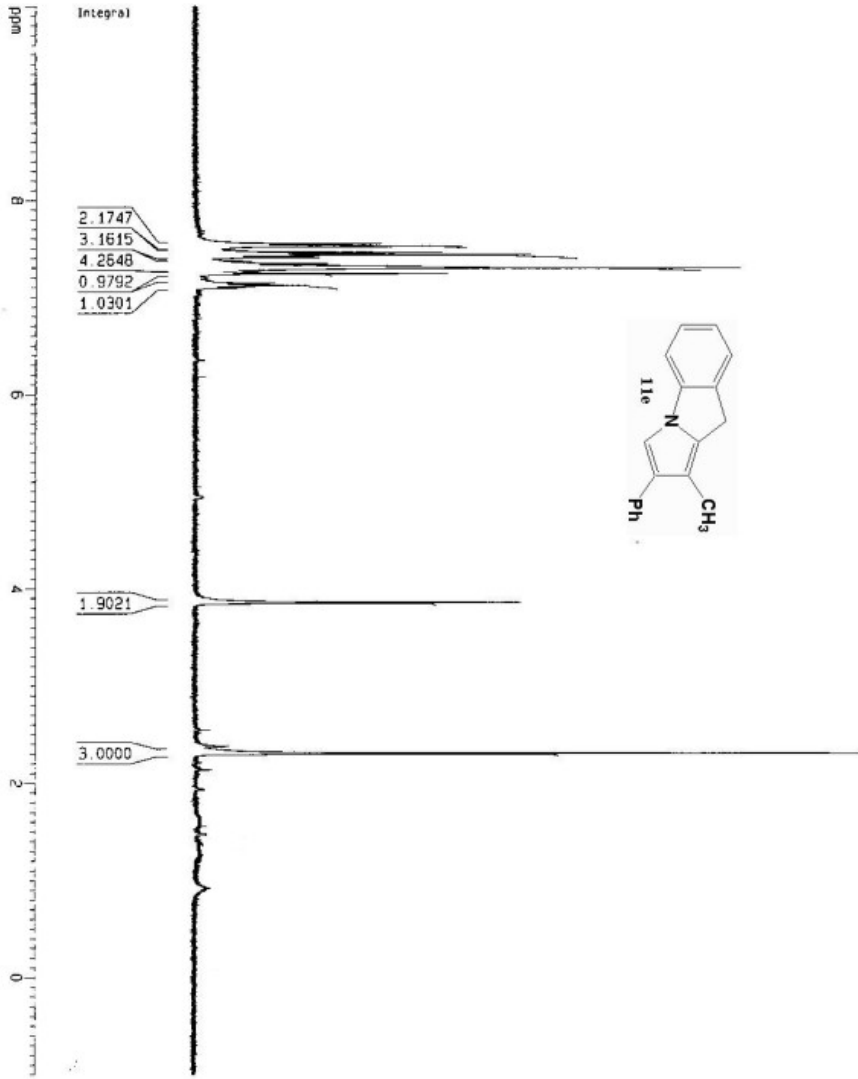

Current Data Parameters  
 NAME: 11e-14017-06  
 EXPNO: 4  
 PROCNO: 1

F2 - Acquisition Parameters  
 Date\_: 20060107  
 Time: 14.25

INSTRUM: spect  
 PROCNO: 5  
 PULPROG: zgpg30

TD: 65536  
 SOLVENT: CDCl3  
 NS: 16  
 DS: 2

SWH: 6172.826 Hz  
 FIDRES: 0.094190 Hz  
 AQ: 5.3084660 sec

RG: 1024  
 DW: 91.000 usec  
 DE: 5.00 usec  
 TE: 300.0 K

D1: 1.00000000 sec

\*\*\*\*\* CHANNEL f1 \*\*\*\*\*  
 NUC1: 1H  
 P1: 11.70 usec  
 PL1: 0.00 dB  
 SF01: 299.8718518 MHz

F2 - Processing parameters  
 SI: 32768  
 SF: 299.8700000 MHz  
 WDM: no  
 SSB: 0  
 LB: 0.00 Hz  
 GB: 0  
 PC: 1.00

10 NMR plot parameters  
 CX: 20.00 cm  
 FIP: 10.000 ppm  
 F1: 2998.70 Hz  
 F2: -299.87 Hz  
 PPMCN: 0.55000 ppm/cr  
 HZCN: 184.96850 Hz/cm

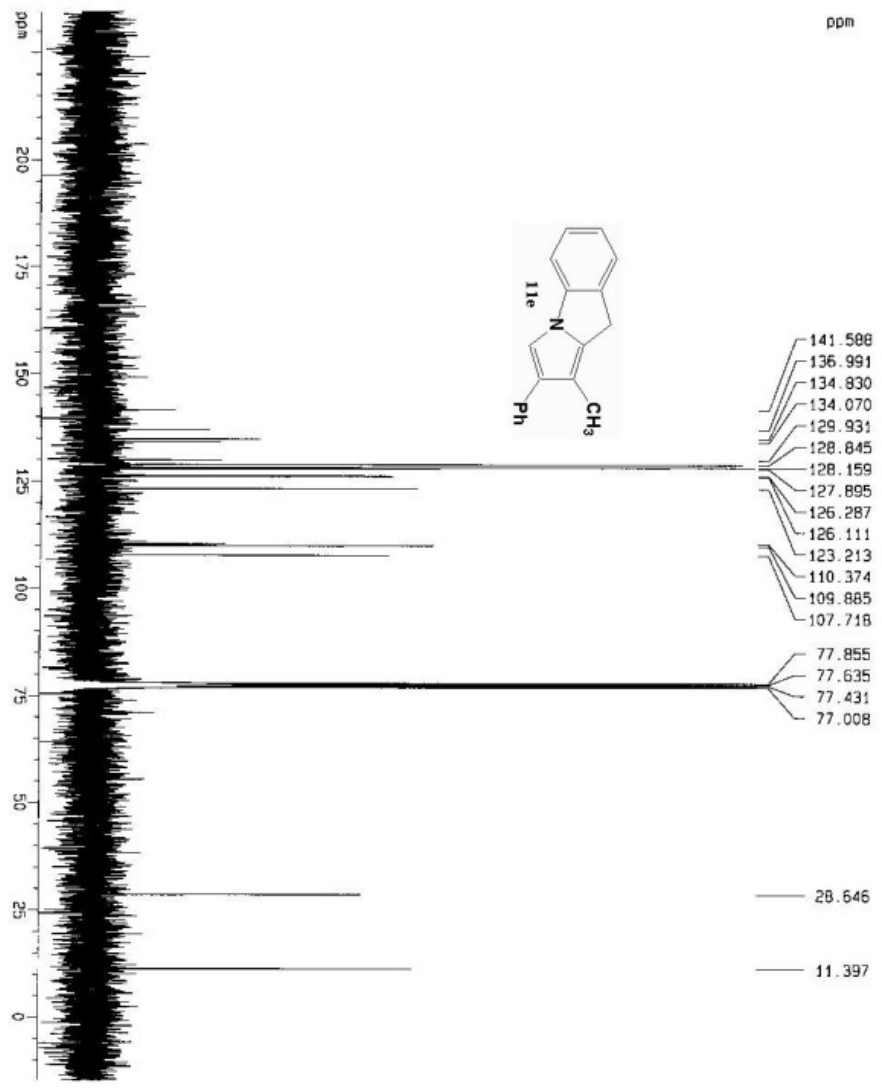

```

Current Data Parameters
NAME      MRI-IND7-08
EXPNO     5
PROCNO    1
F2 - Acquisition Parameters
Date_     20080107
Time      18.41
INSTRUM   spect
PROBHD    5 mm QNP 1H/1
PULPROG   zgpg30
TD         65536
SOLVENT   CDCl3
NS         2048
DS         4
SWH        18736.982 Hz
FIDRES     0.288919 Hz
AQ         1.7432075 sec
RG         512
DM         26.600 usec
DE         6.00 usec
TE         300.0 K
D1         2.00000000 sec
D11        0.03000000 sec
D12        0.00002000 sec

***** CHANNEL f1 *****
NUC1       13C
P1         5.40 usec
PL1        -5.00 dB
SFO1       75.4108357 MHz

***** CHANNEL f2 *****
CPDPRG2    waltz16
NUC2       1H
P2         115.00 usec
PL2         0.00 dB
PL12       20.00 dB
PL13       20.00 dB
SFO2       299.8711955 MHz

F2 - Processing parameters
SI         32768
SF         75.4023410 MHz
WDW        EM
SSB        0
LB         1.00 Hz
GB         0
PC         1.40

1D NMR plot parameters
CX         50.00 cm
F1P        23.651 ppm
F1         1.7503.21 Hz
F2P        -141.638 cm
F2         -1103.25 Hz
PPMCK      12.46445 pos/cm
HZCK       995.84967 Hz/cm
  
```

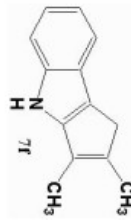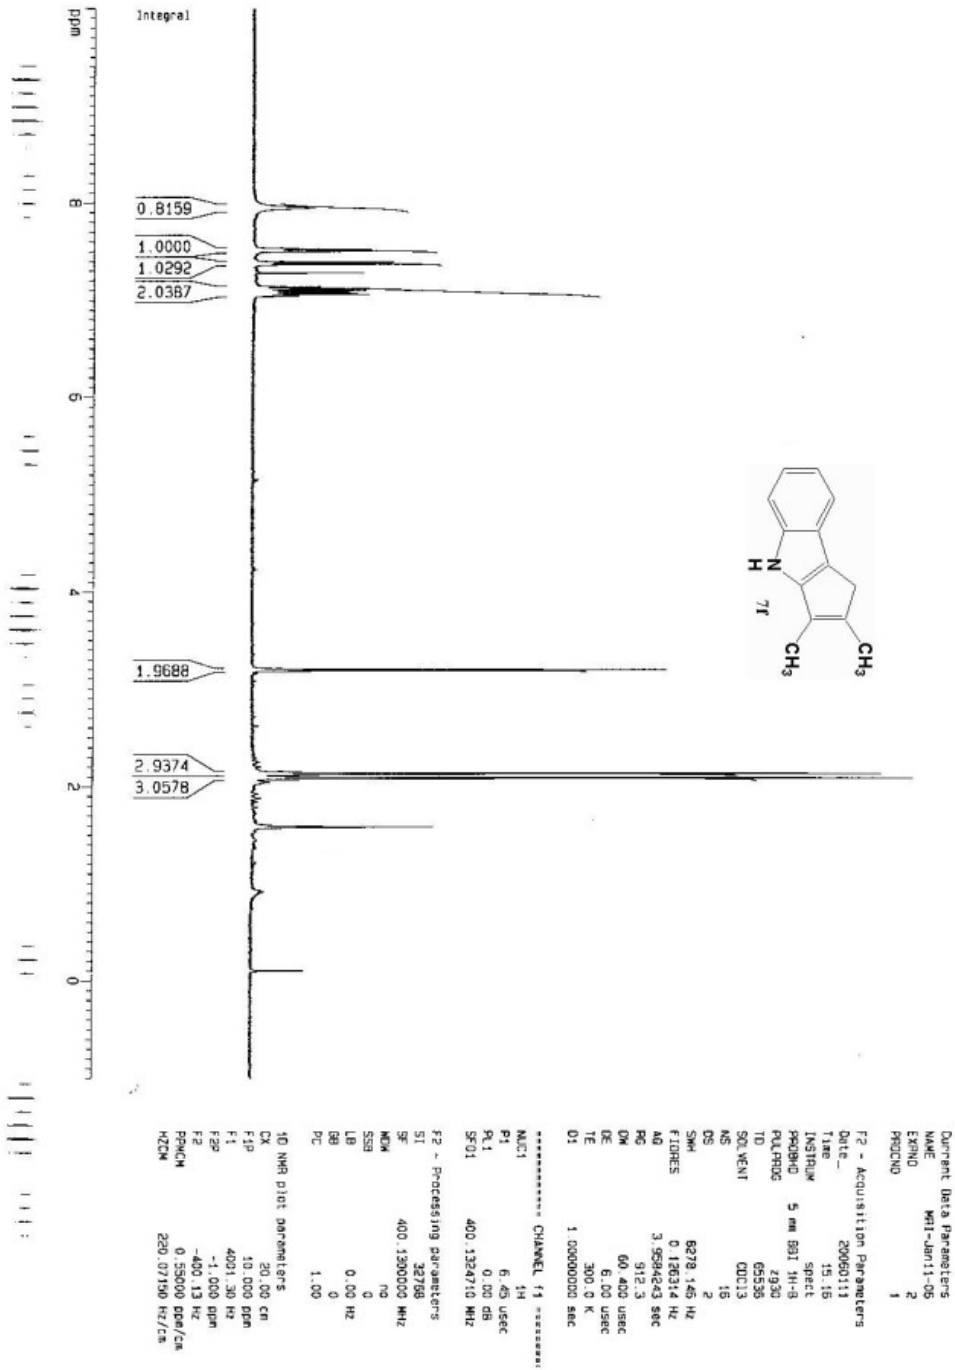

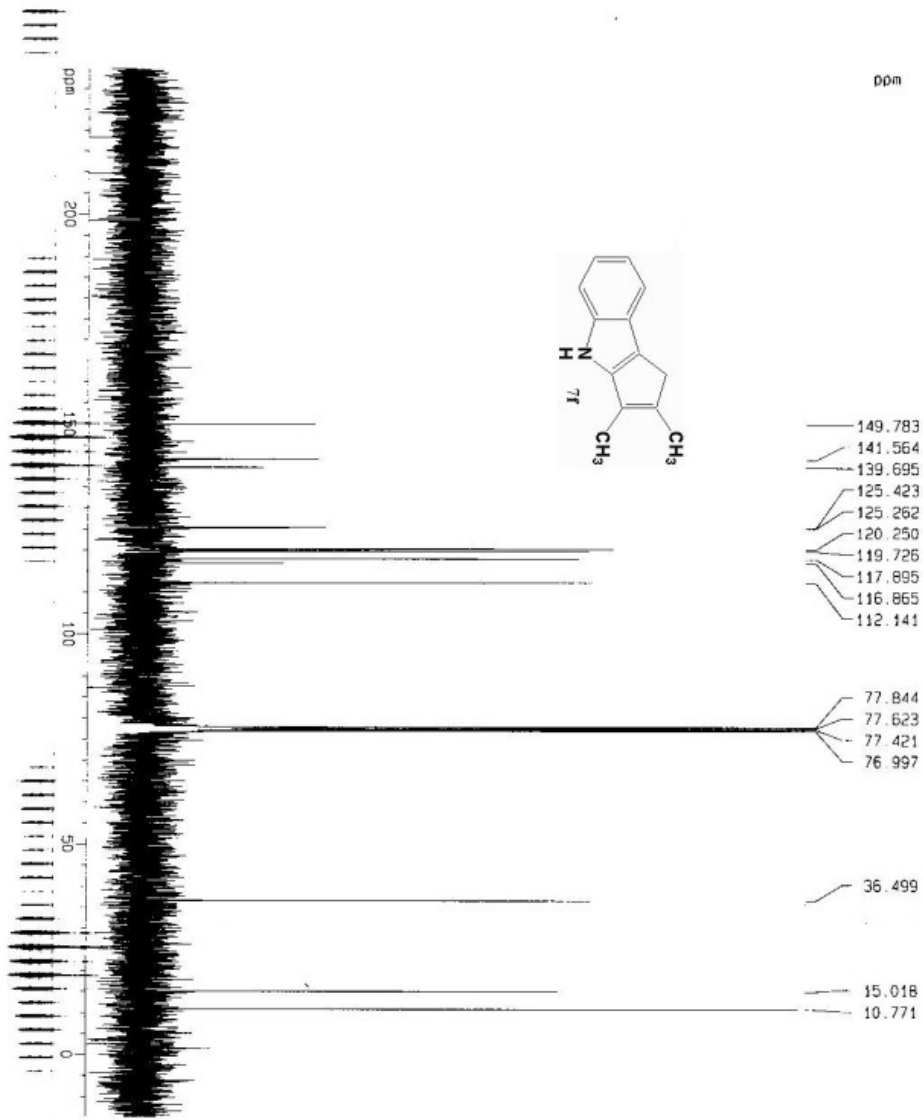

- 149.783
- 141.564
- 139.695
- 125.423
- 125.262
- 120.250
- 119.726
- 117.895
- 116.865
- 112.141

- 77.844
- 77.623
- 77.421
- 76.997

- 36.499

- 15.018
- 10.771

```

Current Data Parameters
NAME      WSI-JMS11-06
EXPNO    2
PROCNO   1

F2 - Acquisition Parameters
Date_    20060112
Time     0.35
INSTRUM  spect
PROBHD   5 mm WULS1nu
PULPROG  zgpg30
TD        65536
SOLVENT  CDCl3
NS        3500
DS        4
SWH       19832.363 Hz
FIDRES   0.297350 Hz
AQ        1.7400300 sec
RG         65804
DM        25.550 usec
DE        6.00 usec
TE        300.0 K
C1        2.00000000 sec
d11       0.03000000 sec
d12       0.00002000 sec

***** CHANNEL f1 *****
NUC1      13C
P1        11.80 usec
PL1       0.00 dB
SFO1      75.475000 MHz

***** CHANNEL f2 *****
COPROG2   waltz16
NUC2       1H
PCPD2     110.00 usec
PL2       0.00 dB
PL12      17.50 dB
PL13      17.50 dB
SFO2      300.1312000 MHz

F2 - Processing parameters
SI         32768
SF         75.4577190 MHz
WDW        EM
SSB        0
LB         1.00 Hz
GB         0
PC         1.40

10 NMR data parameters
D1         20.00 sec
F1         229.700 MHz
F2         127.700 MHz
SFO         20.000 MHz
-1500.00 Hz
PRNDM      12.23824 usec/cycle
SOL         CDCl3
HZTM
  
```

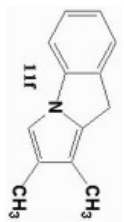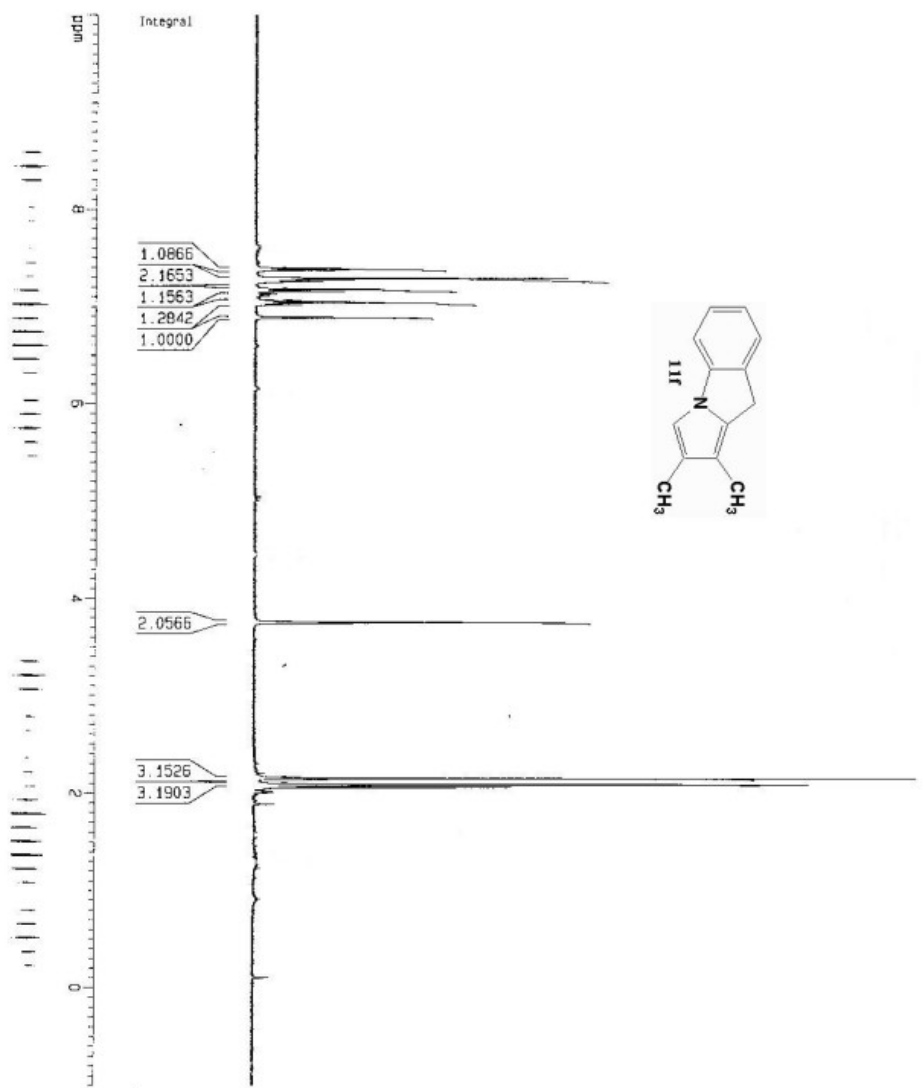

Current Data Parameters  
 NAME: 11F-vent-09  
 EXPNO: 2  
 PROCNO: 1

F2 - Acquisition Parameters  
 Date\_: 20050116  
 Time: 13.51  
 INSTRUM: spect  
 PULPROG: zgpg30  
 PU: 5.00  
 PR: 14.8  
 TD: 2930  
 SOLVENT: CDCl<sub>3</sub>  
 NS: 15  
 DS: 2  
 SWH: 8228.146 Hz  
 FIDRES: 0.126314 Hz  
 AQ: 3.9594243 sec  
 RG: 1448.2  
 DW: 60.400 usec  
 DE: 6.00 usec  
 TE: 300.0 K  
 D1: 1.00000000 sec

CHANNEL f1  
 NUCl: 1H  
 P1: 6.45 usec  
 PL1: 0.00 dB  
 SFO1: 400.1326710 MHz

F2 - Processing parameters  
 SI: 32768  
 SF: 400.1300000 MHz  
 KW: no  
 LB: 0  
 GB: 0.00 Hz  
 PC: 1.00

ID NMR plot parameters  
 CX: 20.00 cm  
 F1P: 10.000 gpm  
 F1: 4001.30 Hz  
 F2P: -1.000 gpm  
 F2: -400.13 Hz  
 PPM/CM: 0.56000 gpm/cm  
 MZCK: 220.07150 Hz/cm



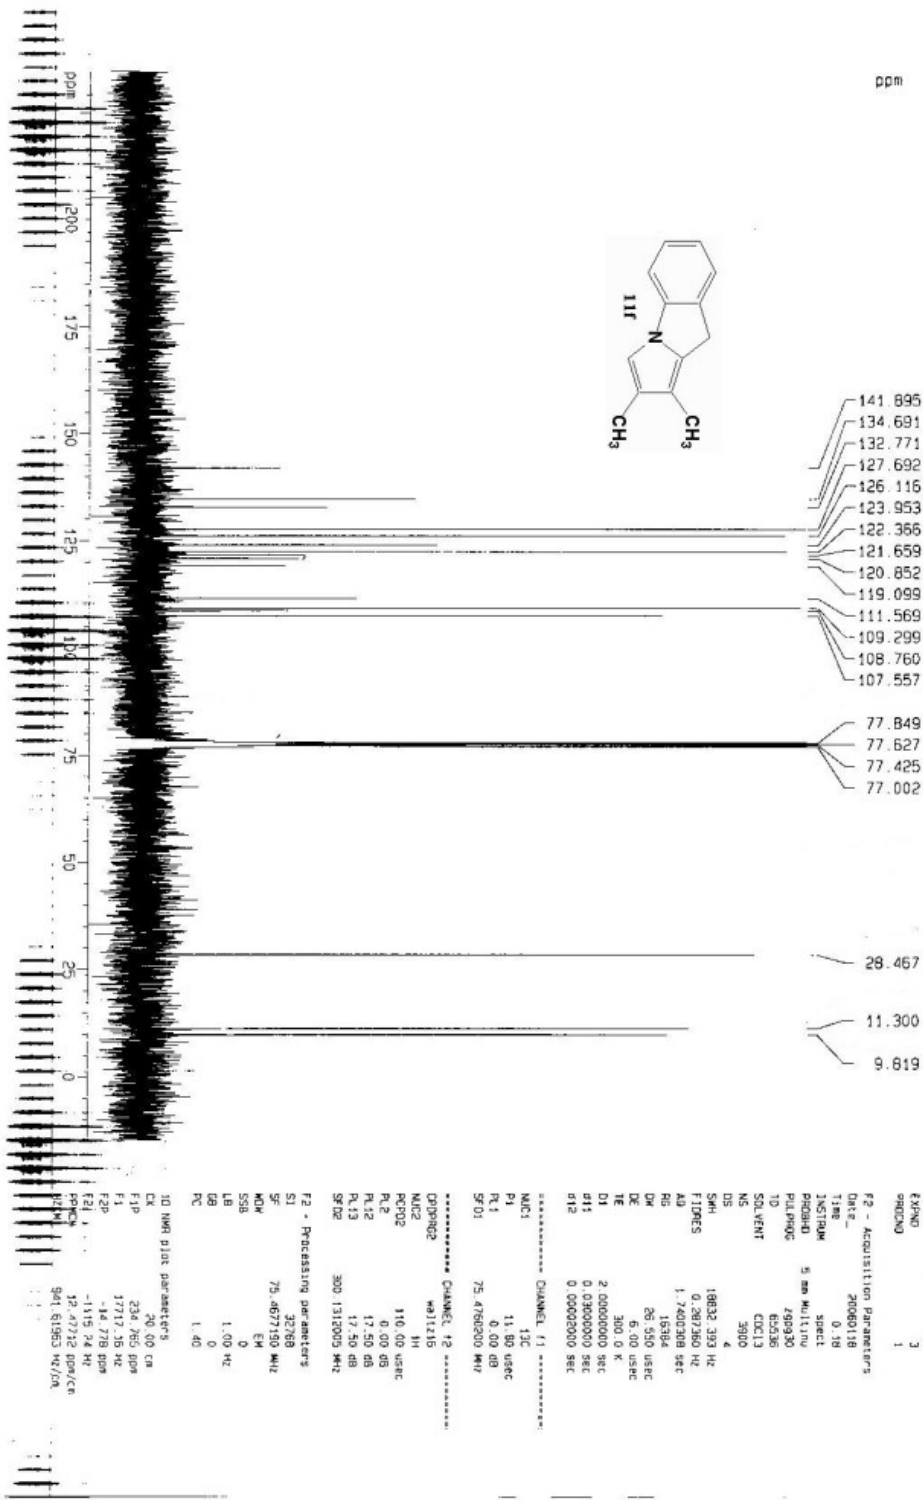

```

Current Data Parameters
NAME      MNI-1017-06
EXPNO    3
PROCNO   1
Date_     2006110
Time      08:19
INSTRUM  spect
PROBHD   5 mm MUX150
PULPROG  zgpg30
TD        65536
SOLVENT  CDCl3
NS        3990
DS        4
SWH       18632.393 Hz
FIDRES    0.287260 Hz
AQ        1.7240208 sec
RG         18784
DM        26.550 usec
DE        6.00 usec
TE        300.0 K
D1        2.00000000 sec
d11       0.03000000 sec
d12       0.00020000 sec

----- CHANNEL f1 -----
NUC1      13C
P1        11.80 usec
PL1       0.00 dB
SFO1      75.476200 MHz

----- CHANNEL f2 -----
OPPRG2   wa1z1b
NUC2      1H
PCPD2    110.00 usec
PL2       0.00 dB
PL12     17.50 dB
PL13     17.50 dB
SFO2     300.1312000 MHz

F2 - Processing parameters
SI        32768
SF        75.467150 MHz
WDW       EM
SSB       0
GB        1.00 Hz
DB        0
PC        1.40

3D NMR plot parameters
CX        20.00 cm
F1P       234.265 ppm
F1        17717.35 Hz
F2P       -14.778 ppm
F2        -1115.24 Hz
PPCK     32.47712 ppm/cm
RZNM     941.61963 Hz/cm
  
```

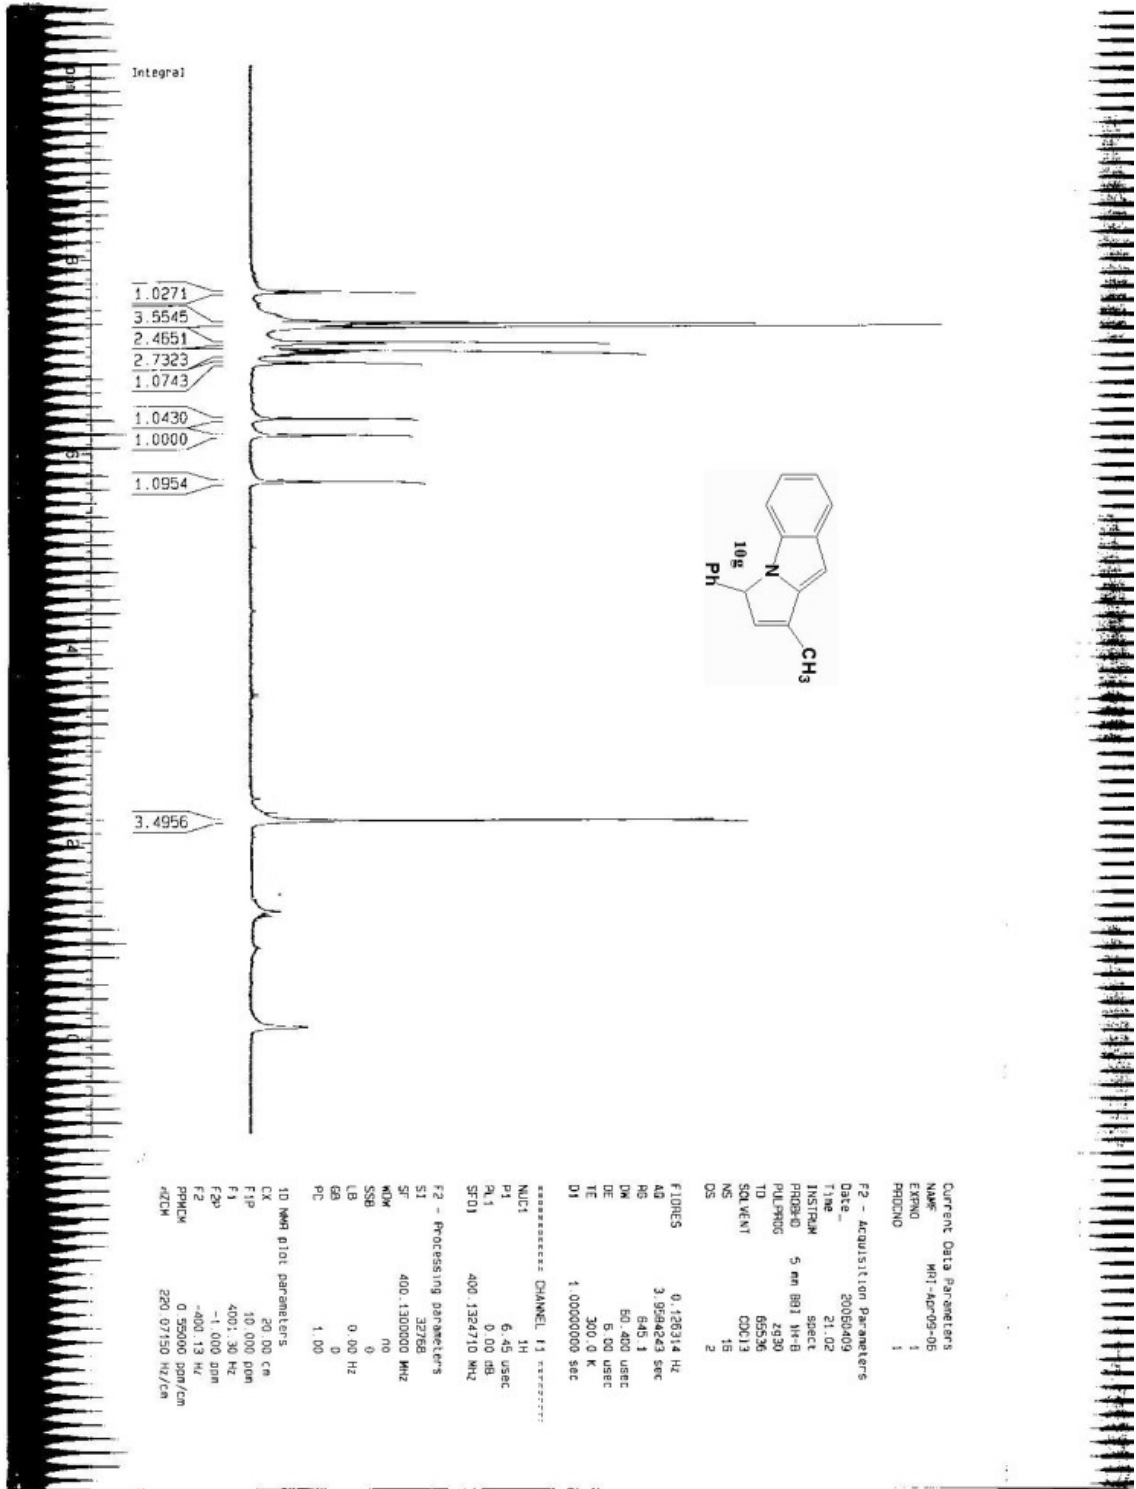

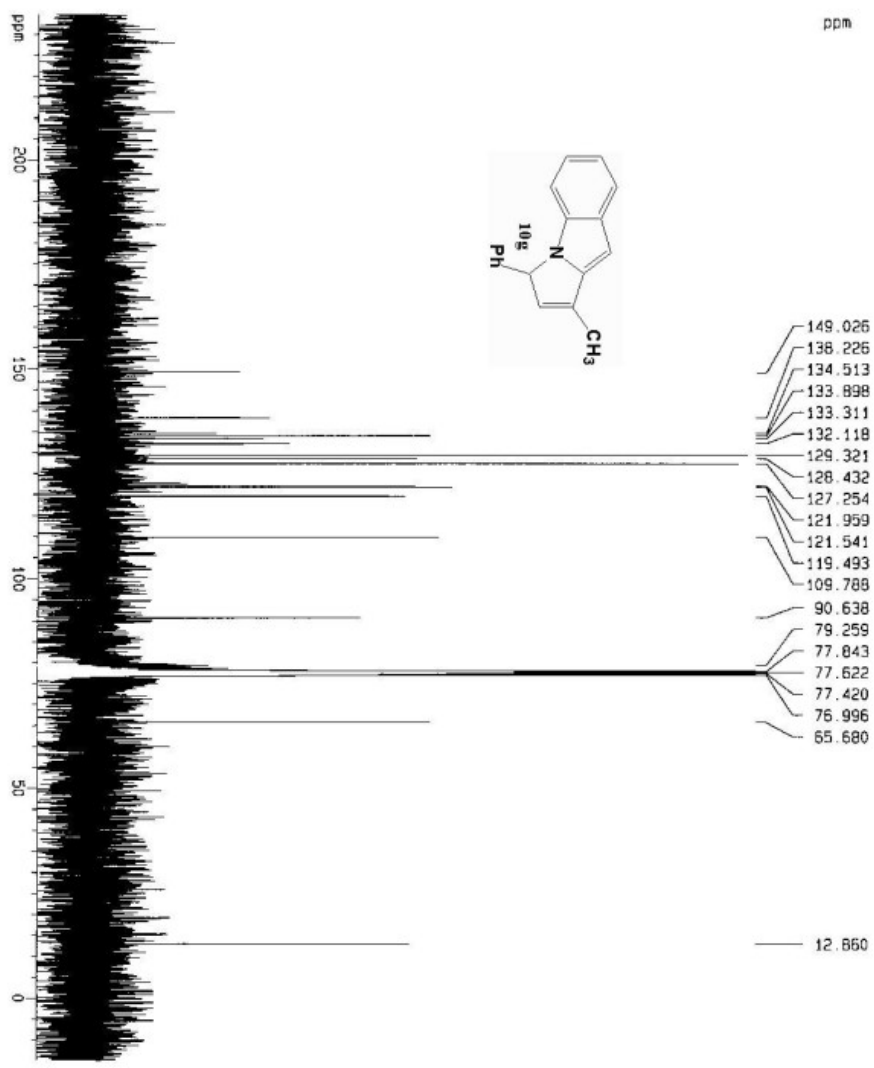

- 149.026
- 138.226
- 134.513
- 133.898
- 133.311
- 132.118
- 129.321
- 128.432
- 127.254
- 121.959
- 121.541
- 119.493
- 109.788
- 90.638
- 79.259
- 77.843
- 77.622
- 77.420
- 76.996
- 65.680

12.650

```

Current Data Parameters
NAME      MRI-AP09-06
EXPNO     3
PROCNO    1
-----
F2 - Acquisition Parameters
Date_     20060410
Time      8.13
INSTRUM   spect
PROBHD    5 mm Multicou
PULPROG   zgpg30
TD         65536
SOLVENT   CDCl3
NS         10448
DS         4
SWH        18932.393 Hz
FIDRES     0.267360 Hz
AQ          1.7460208 sec
RG          1119.6
DE         0E 500 usec
TE          300.0 K
D1          2.00000000 sec
d11         0.03000000 sec
d12         0.00000000 sec
-----
***** CHANNEL f1 *****
NUC1       13C
P1         14.90 usec
PL1        0.00 dB
SFO1       75.4763200 MHz
-----
***** CHANNEL f2 *****
CPDPRG2   mbl1215
NUC2       1H
PCPD2     110.00 usec
PL2        0.00 dB
PL12       17.50 dB
PL13       17.50 dB
SFO2       300.1318005 MHz
-----
F2 - Processing parameters
SI         32768
SF         75.467190 MHz
WDW        EM
SSB        0
LB         1.00 Hz
GB         0
PC         1.40
-----
1D NMR plot parameters
CX         50.00 cm
F1P        234.780 DPM
F1         17717.48 Hz
F2         -1009.36 Hz
PASCAL    13 73834 opa/cm
NTCPC     951 32956 Hz/cm
  
```

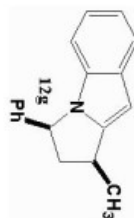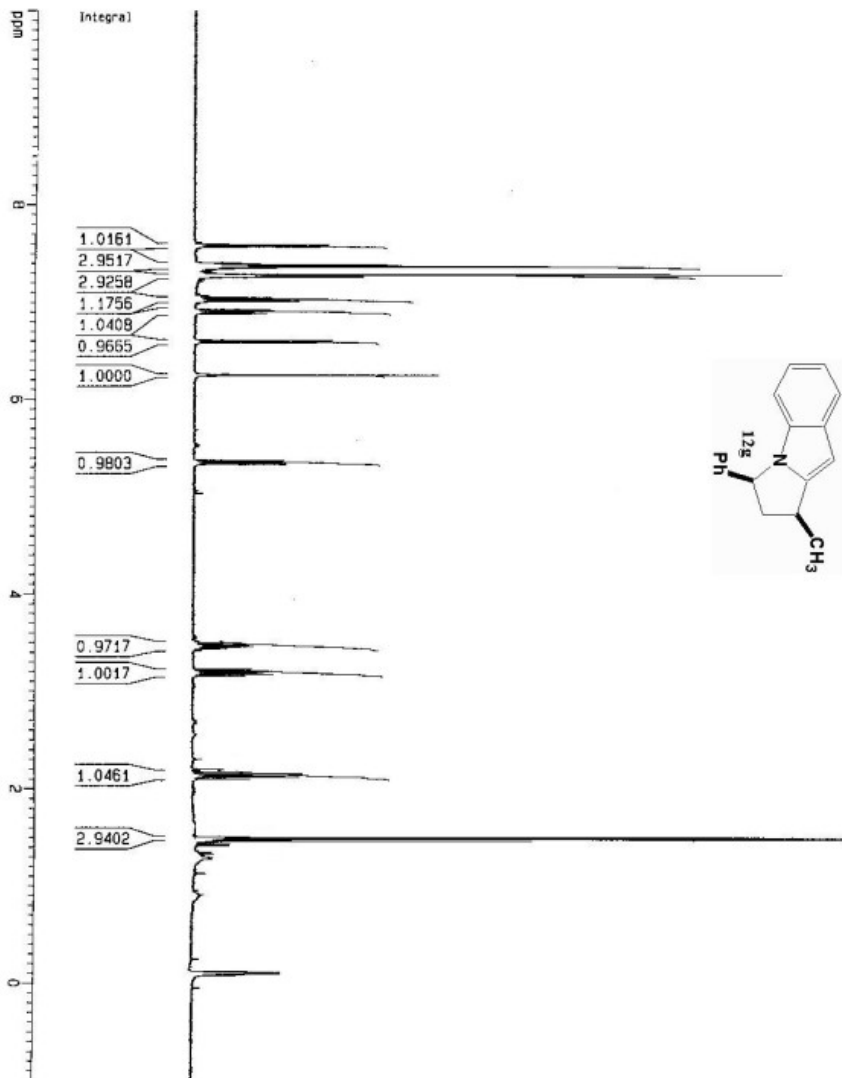

Current Data Parameters  
 NAME M01-Nov12-05  
 EXPNO 3  
 PROCNO 1

F2 - Acquisition Parameters  
 Date\_ 20051112  
 Time 10.58  
 INSTRUM spect  
 PROBHD 5 mm BBI 1H-3  
 PULPROG zgpg30  
 TD 65535  
 SOLVENT DMS-D3  
 NS 15  
 DS 2  
 SMH 8278.146 Hz  
 FIDRES 0.126314 Hz  
 AQ 3.5984243 sec  
 RG 724.1  
 DE 50.400 usec  
 DM 5.00 usec  
 TE 300.0 K  
 D1 1.00000000 sec

\*\*\*\*\* CHANNEL f1 \*\*\*\*\*  
 NUC1 1H  
 P1 8.45 usec  
 PL1 0.00 dB  
 SFO1 400.1324710 MHz

F2 - Processing parameters  
 SI 27756  
 SF 400.1300000 MHz  
 MDW no  
 SSB 0  
 LB 0.00 Hz  
 BR 0  
 PC 1.00

1D NMR plot parameters  
 CX 20.00 cm  
 FIP 10.000 ppm  
 F1 4001.30 Hz  
 F2P -1.000 ppm  
 F2 -400.13 Hz  
 PPM0H 0.35000 ppm/cm  
 NCHW 220.07150 Hz/cm

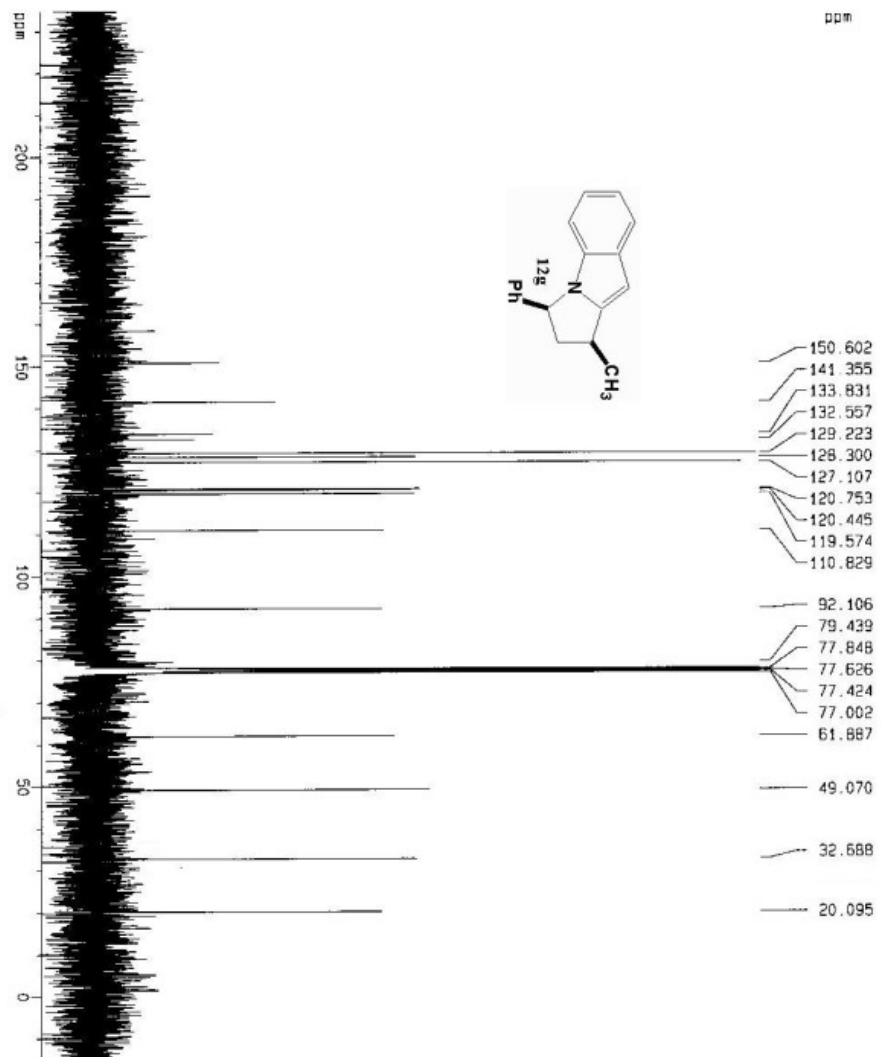

- 150.602
- 141.355
- 133.831
- 132.557
- 129.223
- 128.300
- 127.107
- 120.753
- 120.445
- 119.574
- 110.829
- 92.106
- 79.439
- 77.848
- 77.626
- 77.424
- 77.002
- 61.887
- 49.070
- 32.688
- 20.095

```

Current Data Parameters
NAME          M01-04/12-05
EXPNO         1
PROCNO        1

F2 - Acquisition Parameters
Date_         20051112
Time          13.38
INSTRUM      spect
PROBHD      5 mm HLL1nu
PULPROG      zgpg30
TD           65536
SOLVENT      CDCl3
NS           2233
DS           4
SFO1         100.625 MHz
FIDRES       0.2407860 Hz
AQ           1.7400308 sec
RG           11588.2
DM           26.550 usec
DE           5.00 usec
TE           300.0 K
O1           2.0000000 sec
O2           0.0300000 sec
O3           0.0002000 sec
O4           0.0002000 sec

***** CHANNEL f1 *****
NUC1          13C
P1           11.80 usec
PC1          0.00 dB
SFO1         75.4762000 MHz

***** CHANNEL f2 *****
CPDPRG2      waltz16
NUC2          1H
P2           110.00 usec
PC2          0.00 dB
SFO2         500.1320000 MHz

F2 - Processing parameters
SI           32768
SF           75.4671500 MHz
WDW          EM
SSB          0
LB           1.00 Hz
GB           0
PC           1.40

1D NMR plot parameters
CK           20.00 cm
F1P          234.765 ppm
F2P          17171.15 Hz
F2           -20.000 ppm
DPRCHM      12.73854 ppm/cm
SFO1         75.4671500 MHz
SFO2         500.1320000 MHz
  
```

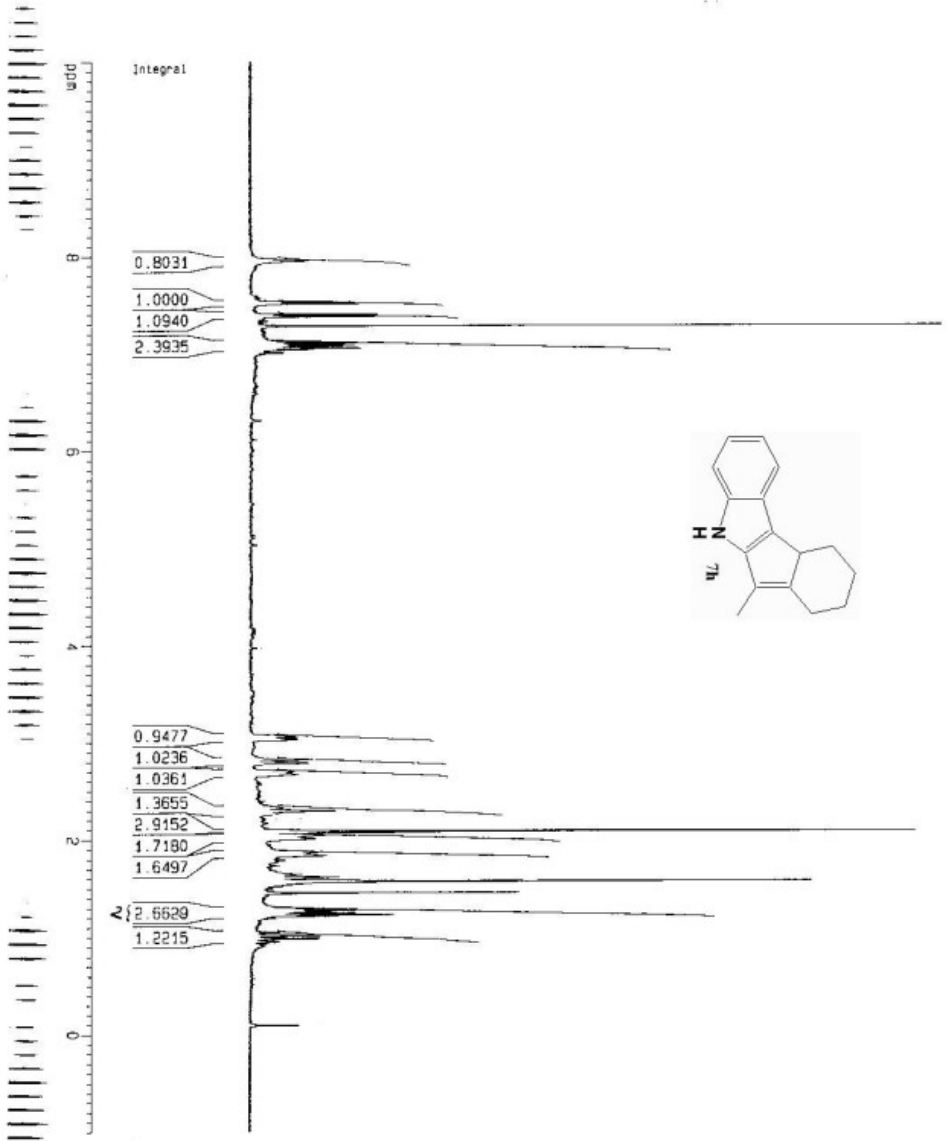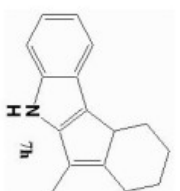

Current Data Parameters  
 NAME KR1-JAN21-05  
 EXPNO 7  
 PROCNO 1

F2 - Acquisition Parameters

Date\_ 20080121  
 Time 17.36  
 INSTRUM spect  
 PROBRD 5 mm BBI 1H-B  
 PULPROG zg30  
 TD 65536  
 SOLVENT CDCl3  
 NS 16  
 DS 2  
 SWH 8078.146 Hz  
 FIDRES 0.189314 Hz  
 AQ 3.9584243 sec  
 RG 322.5  
 DM 60.400 usec  
 DE 6.00 usec  
 TE 300.0 K  
 D1 1.00000000 sec

\*\*\*\*\* CHANNEL f1 \*\*\*\*\*

NUC1 1H  
 P1 6.45 usec  
 PL1 0.00 dB  
 SF01 400.1326710 MHz

F2 - Processing parameters

SI 32768  
 SF 400.1300000 MHz  
 MDW no  
 SSB 0  
 LB 0.00 Hz  
 GB 0  
 PC 1.00

1D NMR pilot parameters

CX 20.00 ca  
 F1P 10.000 ppm  
 F1 4001.30 Hz  
 F2P -1.000 ppm  
 F2 -400.13 Hz  
 PPM/CM 0.55000 ppm/cm  
 HZ/CM 280.07150 Hz/cm

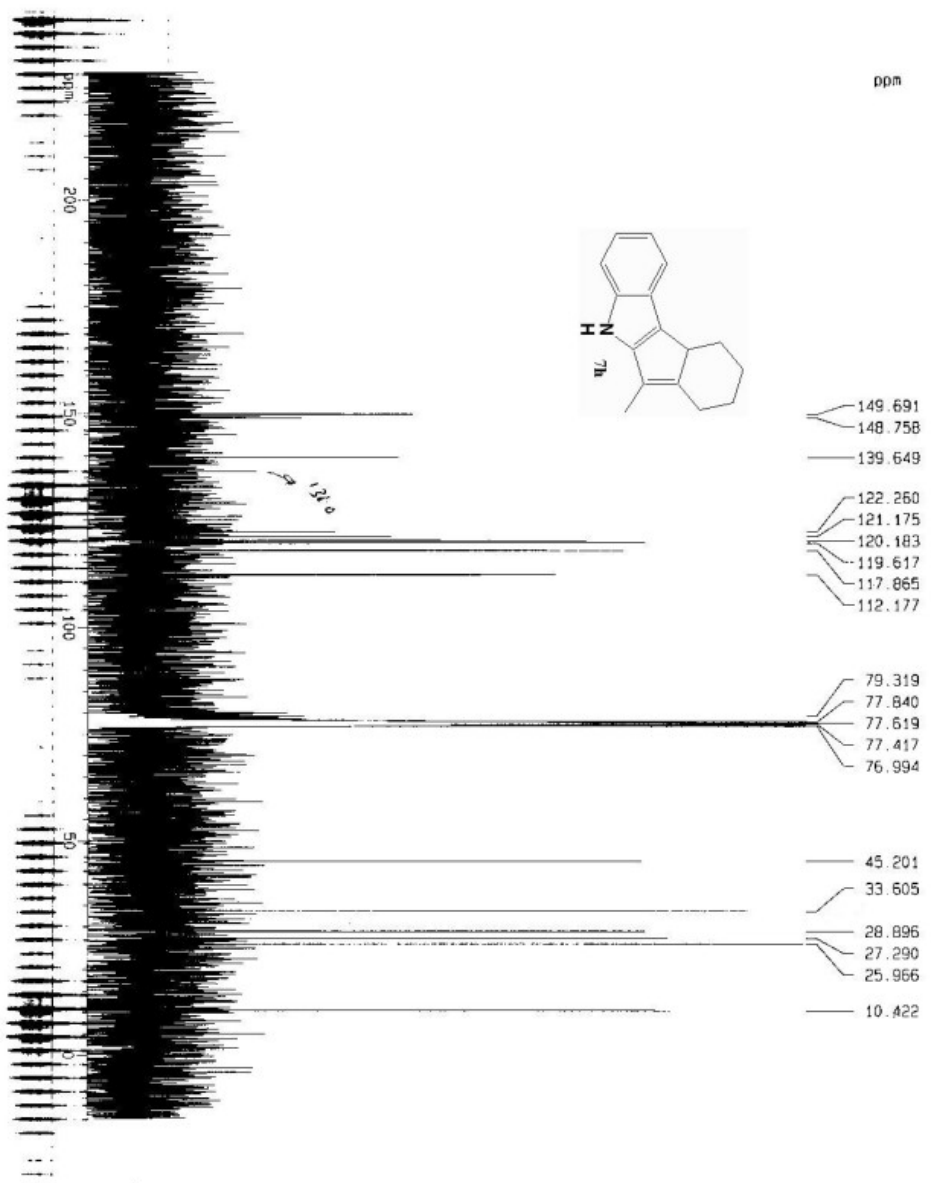

- 149.691
- 148.758
- 139.649
- 122.260
- 121.175
- 120.183
- 119.617
- 117.865
- 112.177

- 79.319
- 77.840
- 77.619
- 77.417
- 76.994

- 45.201
- 33.605
- 28.896
- 27.290
- 25.966
- 10.422

```

Current Data Parameters
NAME      M01-0007-05
EXPNO    4
PROCNO   1
-----
F2 - Acquisition Parameters
Date_    20080122
Time     08:31
INSTRUM  spect
PROBHD   5 mm WALTZ
PULPROG  zgpg30
TD       65536
SOLVENT  CDCl3
NS       7000
DS       4
SWH      19832.353 Hz
FIDRES   0.292760 Hz
AQ       1.72400108 sec
RG       115601.2
DM       25.540 usec
DE       6.00 usec
TE       300.0 K
SFO1     2.00000000 sec
SFO2     0.03000000 sec
SFO3     0.00020000 sec
-----
CHANNEL F1
NUC1      13C
P1       11.80 usec
PL1      0.00 dB
SFO1     75.4762000 MHz
-----
CHANNEL F2
PROBHD   WALTZ16
NUC2      1H
P2       110.00 usec
PL2      0.00 dB
PL12     47.50 dB
PL13     47.50 dB
SFO2     300.1312000 MHz
-----
F2 - Processing parameters
SI       32768
SF       75.4677150 MHz
WDW      EM
SSB      0
LB       1.00 Hz
GB       0
PC       1.40
-----
1D NMR plot parameters
CX       20.00 cm
F1P      230.000 MHz
F1       47257.57 Hz
F2P      20.000 MHz
F2       -15691.36 MHz
NUC1     12.50000000 MHz
PCWHICH 12.50000000 MHz
H2C1M   943.246500000 Hz
  
```

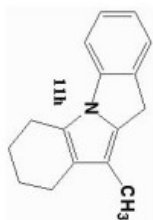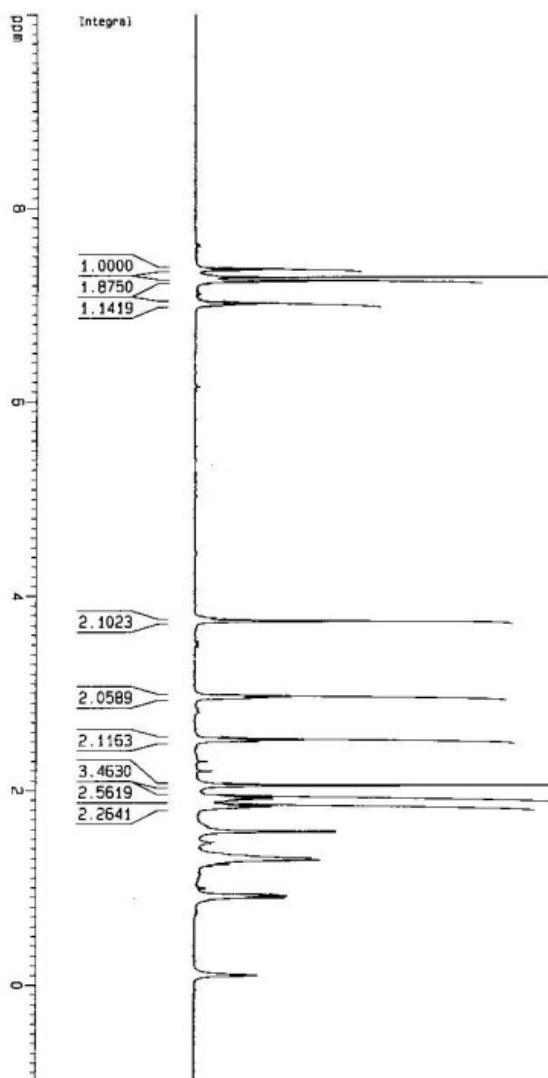

Current Data Parameters  
 NAME NRI-JUNE1-05  
 EXPNO 1  
 PROCNO 1

F2 - Acquisition Parameters  
 Date\_ 20050621  
 Time 19.00  
 INSTRUM spect  
 PROBRG 5 mm BBI 1H-9  
 PULPROG zg30  
 TO 65536  
 SOLVENT CDCl<sub>3</sub>  
 NS 32  
 DS 2  
 SWH 8278.146 Hz  
 FIDRES 0.183314 Hz  
 AQ 3.5584243 sec  
 RG 512  
 DM 60.400 usec  
 DE 6.00 usec  
 TE 300.0 K  
 D1 1.00000000 sec

\*\*\*\*\* CHANNEL f1 \*\*\*\*\*  
 NUC1 1H  
 P1 6.45 usec  
 PL1 0.00 dB  
 SFO1 400.1324710 MHz

F2 - Processing parameters  
 SI 32768  
 SF 400.1300000 MHz  
 WDW no  
 SSB 0  
 LB 0.00 Hz  
 GB 0  
 PC 1.00

1D NMR plot parameters  
 CX 20.00 cm  
 F1P 10.000 ppm  
 F1 -4001.30 Hz  
 F2P -1.000 ppm  
 F2 -400.13 Hz  
 PRNOM 0.55000 ppm/cm  
 NTCOM 220.07150 Hz/cm



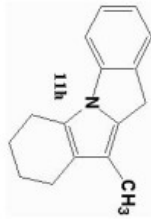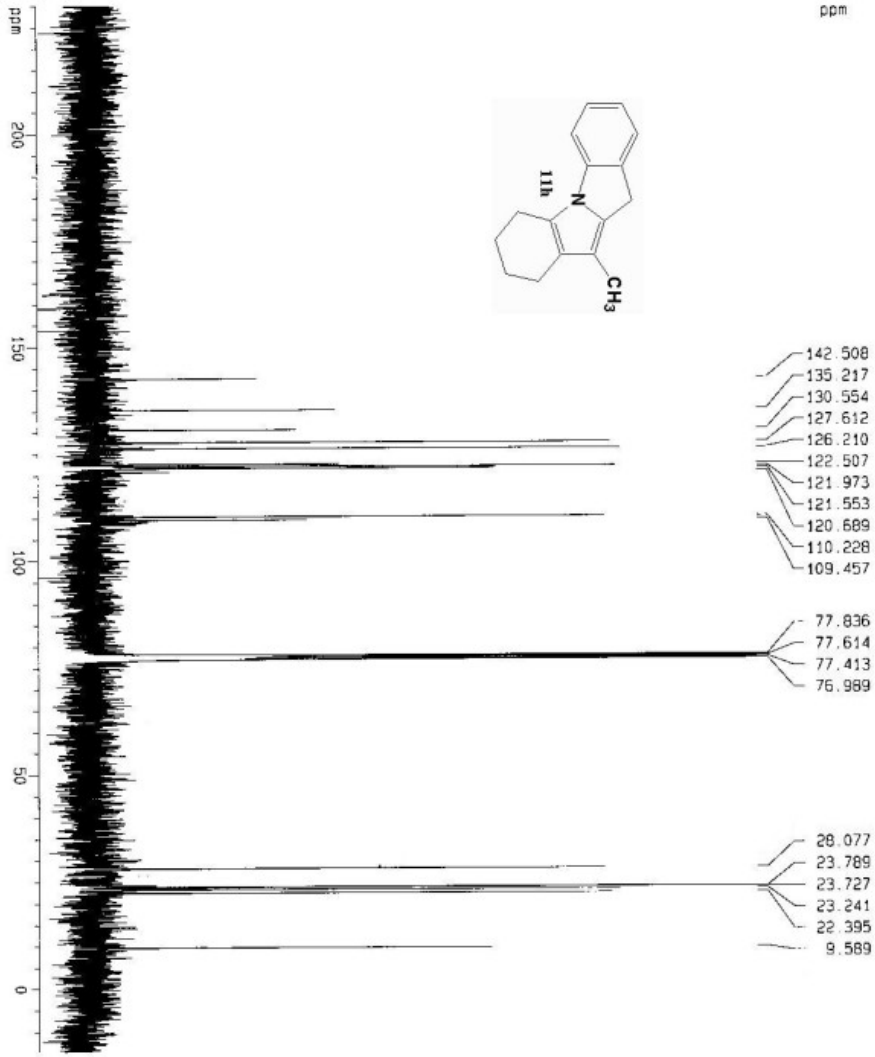

```

Current Data Parameters
NAME      M01-0h21-05
EXPNO    4
PROCNO   1

F2 - Acquisition Parameters
Date_    20080122
Time     5.40
INSTRUM  spect
PROBHD   5 mm QNP 1H/1
PULPROG  zgpg30
TD        65536
SOLVENT  CDCl3
NS        8000
DS        4
SWH       18795.992 Hz
FIDRES    0.286819 Hz
AQ         1.7423076 sec
RG         514.7
DE         26.600 usec
TE         300.0 K
D1         2.80000000 sec
D11        0.03000000 sec
D12        0.00020000 sec

----- CHANNEL f1 -----
NUC1      13C
P1         5.40 usec
PL1       -6.00 dB
SFO1      75.410637 MHz

----- CHANNEL f2 -----
COPROG2   waltz16
NUC2       1H
P2         115.00 usec
PL2        0.00 dB
PL12       20.00 dB
PL13       20.00 dB
SFO2      299.8711995 MHz

F2 - Processing parameters
SI         32768
SF         75.4023410 MHz
WDW        EM
SSB         0
LB          1.00 Hz
GB          0
PC          1.40

10 NMR plot parameters
CX          20.00 cm
F1         230.000 ppm
F2         17342.54 Hz
F2a        -20.000 ppm
F2b        -1508.05 Hz
F2c        32.50000 ppm/cm
HZCM       542.58330 Hz/cm
  
```

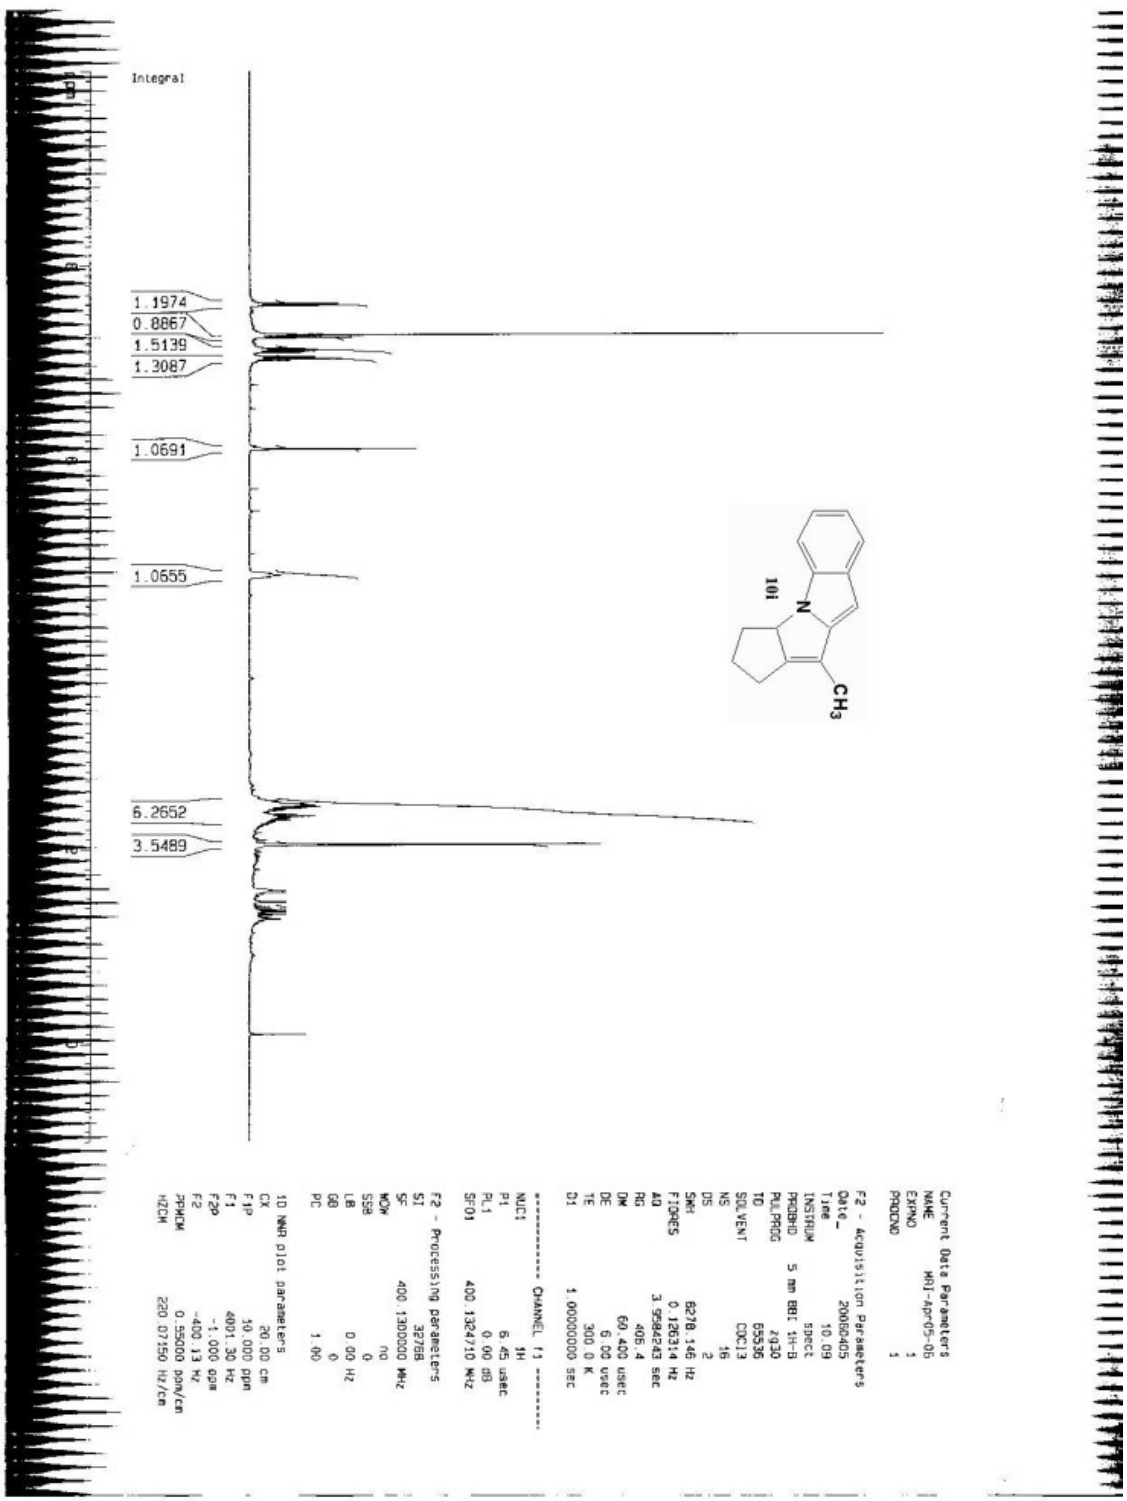

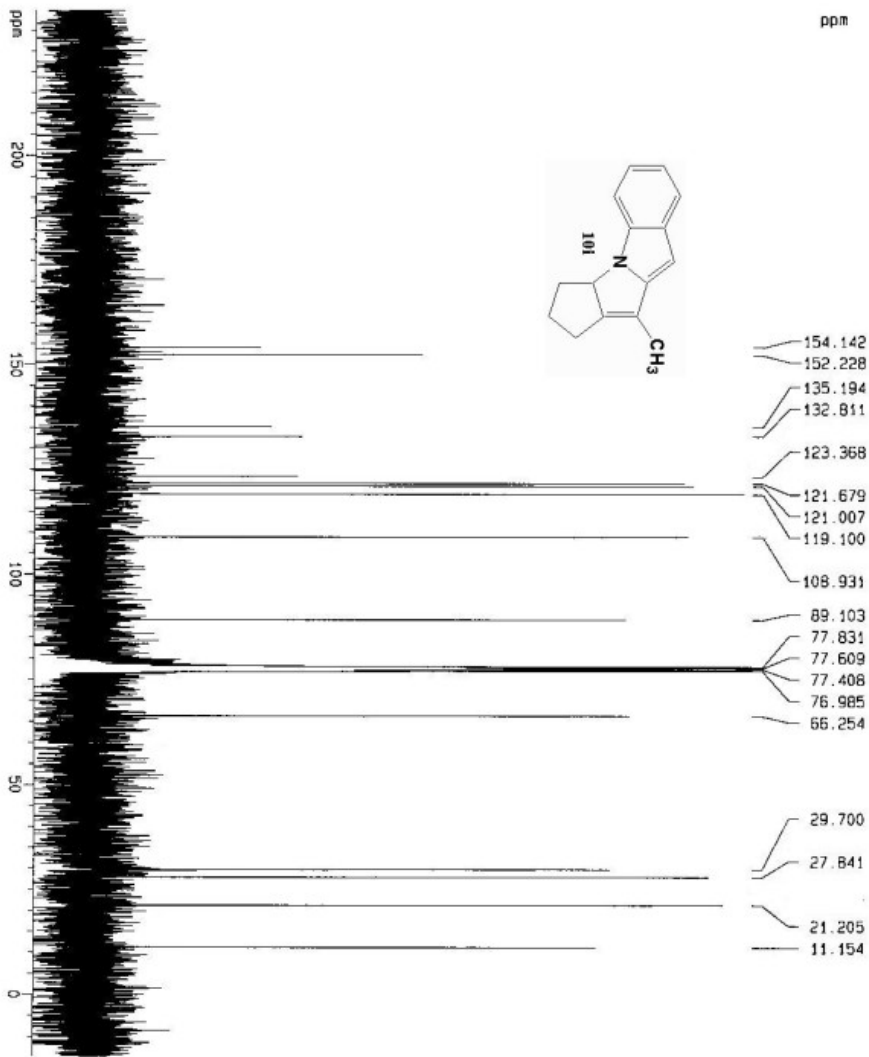

- 154.142
- 152.228
- 135.194
- 132.811
- 123.368
- 121.679
- 121.007
- 119.100
- 108.931
- 89.103
- 77.831
- 77.609
- 77.408
- 76.985
- 66.254
- 29.700
- 27.841
- 21.205
- 11.154

```

Current Data Parameters
NAME      M1-467-06
EXPNO    2
PROCNO   1

F2 - Acquisition Parameters
Date_    20040717
Time     09:49
INSTRUM  spect
PROBHD   5 mm M111pro
PULPROG  zgpg30
TD        65536
SOLVENT  CDCl3
NS        17000
DS        4
SFO1     100.625000 MHz
FIDRES   0.267360 Hz
AQ       1.7400308 sec
RG       11595.2
DM       28.550 usec
DE       6.00 usec
TE       300.0 K
D1       2.00000000 sec
d11      0.23000000 sec
d12      0.10000000 sec

***** CHANNEL f1 *****
NUC1      13C
P1       11.80 usec
PL1      0.00 dB
SFO1     75.4750200 MHz

***** CHANNEL f2 *****
CPDPRG2  waltz16
NUC2      1H
P2       150.00 usec
PL2      0.00 dB
PL12     17.50 dB
PL13     17.50 dB
SFO2     300.1352605 MHz

F2 - Processing parameters
SI       32768
SF       75.4677190 MHz
WDW      EM
SSB      0
LB       1.00 Hz
GB       0
PC       1.40

1D NMR Data Parameters
CX       20.00 cm
F1P      234.765 ppm
F1       117.1715 Hz
F2P      -30.000 ppm
F2       -1501.35 Hz
PEPICK   12.73623 conv/cm
HZCW     581.32950 Hz/cm
  
```

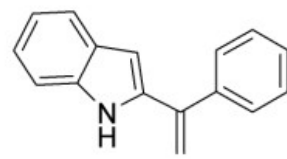

14j

DKH2-297P

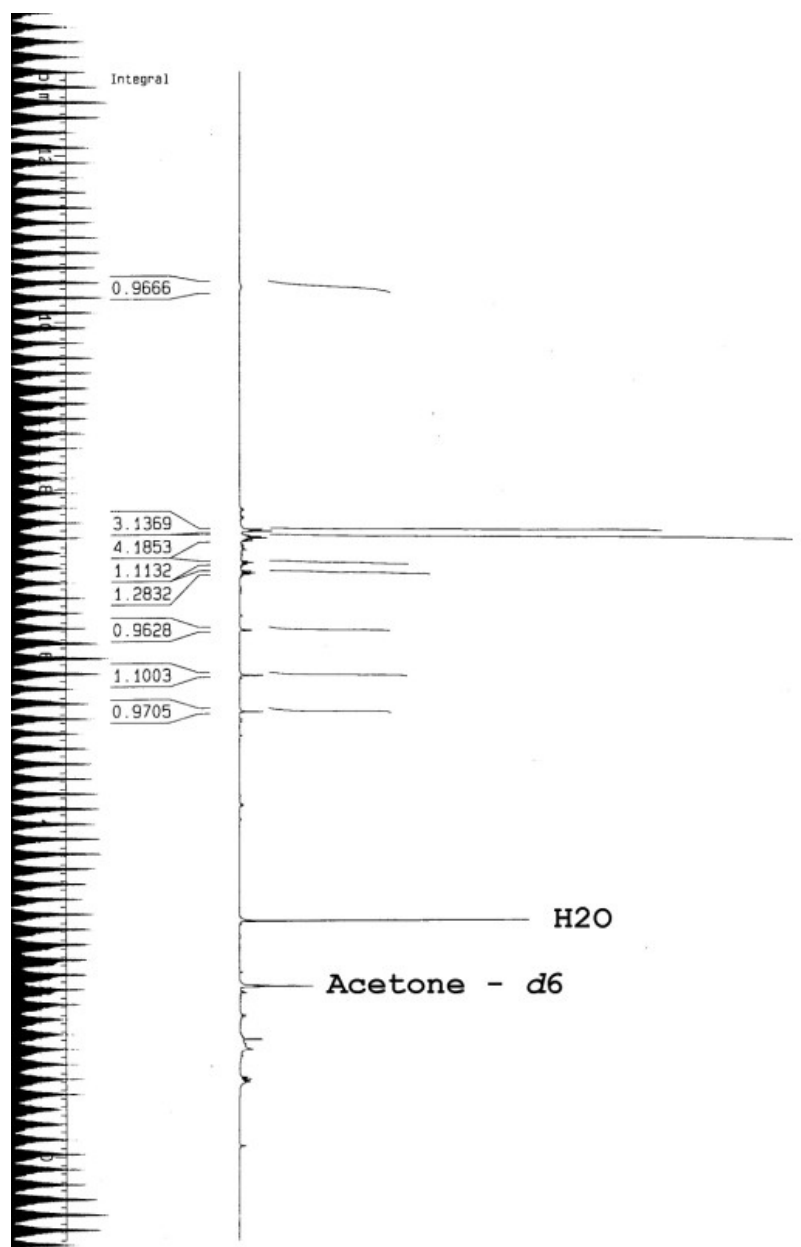

Current Data Parameters  
 NAME DKH2-297P  
 EXPNO 1  
 PROCNO 1

F2 - Acquisition Parameters  
 Date\_ 20060407  
 Time 13.44  
 INSTRUM spect  
 PROBRHD 5 mm BBI 1H-B  
 PULPROG zg30  
 TD 65536  
 SOLVENT Acetone  
 NS 16  
 DS 2  
 SMH 8278.146 Hz  
 FIDRES 0.126314 Hz  
 AQ 3.9598243 sec  
 RG 228.1  
 DM 60.400 usec  
 DE 6.00 usec  
 TE 300.0 K  
 D1 1.00000000 sec

\*\*\*\*\* CHANNEL f1 \*\*\*\*\*  
 NUC1 1H  
 P1 6.45 usec  
 PL1 0.00 dB  
 SF01 400.1324710 MHz

F2 - Processing parameters  
 SI 32768  
 SF 400.1300106 MHz  
 KDM no  
 SSB 0  
 LB 0.00 Hz  
 GB 0  
 PC 1.00

10 NMR plot parameters  
 CX 20.00 cm  
 FIP 13.000 ppm  
 F1 5201.69 Hz  
 F2p -1.000 ppm  
 F2 -400.13 Hz  
 PPM/CM 0.70000 ppm/cm  
 HZCM 280.09100 Hz/cm

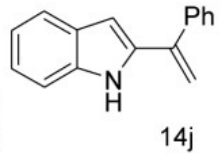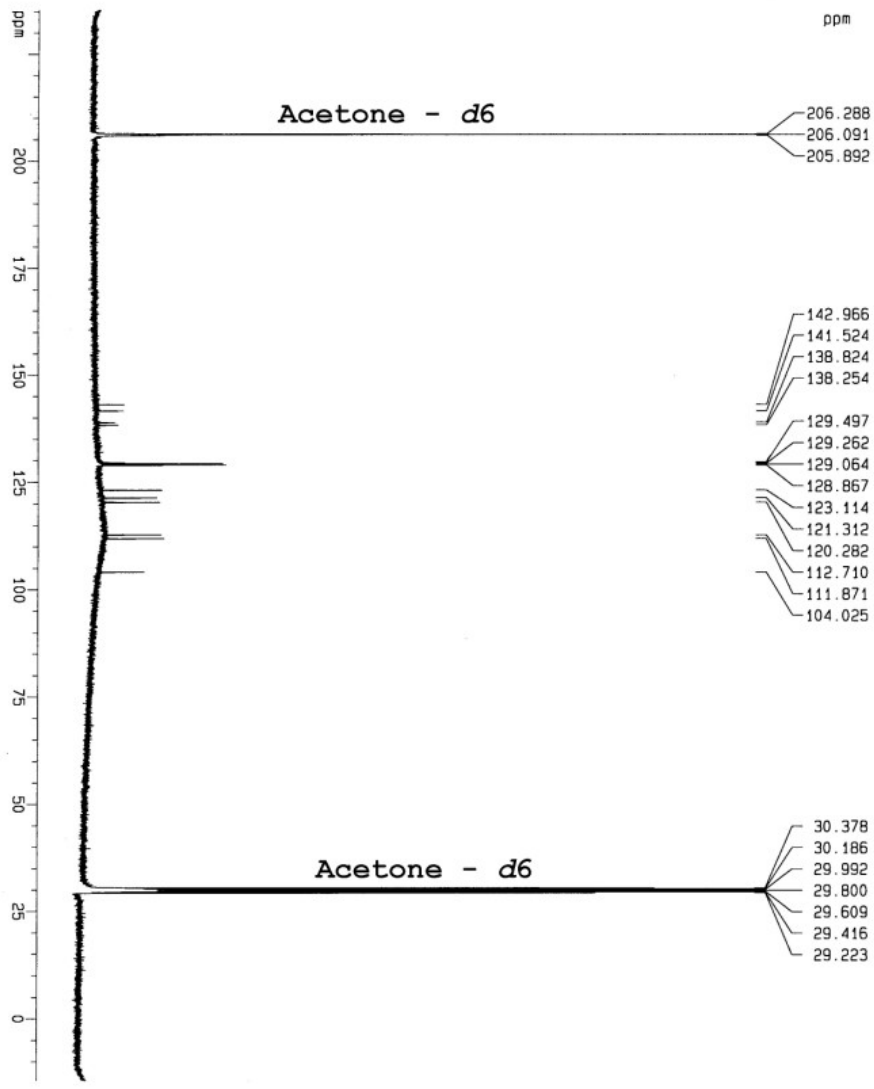

DKH2-110 Product

```

Current Data Parameters
NAME          DKH2-110
EXPNO         666
PROCNO        1

F2 - Acquisition Parameters
Date_         20060422
Time          17.36
INSTRUM       spect
PROBHD        5 mm BBO 1H-13
PULPROG       zgpg30
TD            65536
SOLVENT       Acetone
NS            2000
DS            4
SWH            25126.629 Hz
FIDRES        0.383397 Hz
AQ            1.3042164 sec
RG            4066
DE            13.900 usec
TE            300.0 K
D1            2.00000000 sec
d12           0.03000000 sec
d13           0.00002000 sec

***** CHANNEL f1 *****
NUC1           13C
P1            16.35 usec
PL1           -6.00 dB
SFO1          100.6237959 MHz

***** CHANNEL f2 *****
CPDPRG2       waltz16
NUC2           1H
PCPD2         114.00 usec
PL2           0.00 dB
PL12          24.00 dB
PL13          24.00 dB
SFO2          400.1316005 MHz

F2 - Processing parameters
SI            32768
SF            100.6126821 MHz
WDW           EM
SSB           0
LB            1.00 Hz
GB            0
PC            1.40

1D NMR plot parameters
CX            20.00 cm
F1P           235.340 ppm
F1            2352.561 Hz
F2P           -149.03 Hz
F2            -12.48531 ppm/cm
H2C1M         1256.28137 Hz/cm
  
```

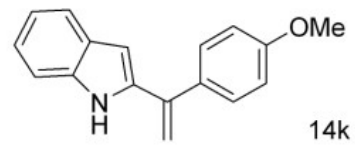

DKH2-172 Flush product purified

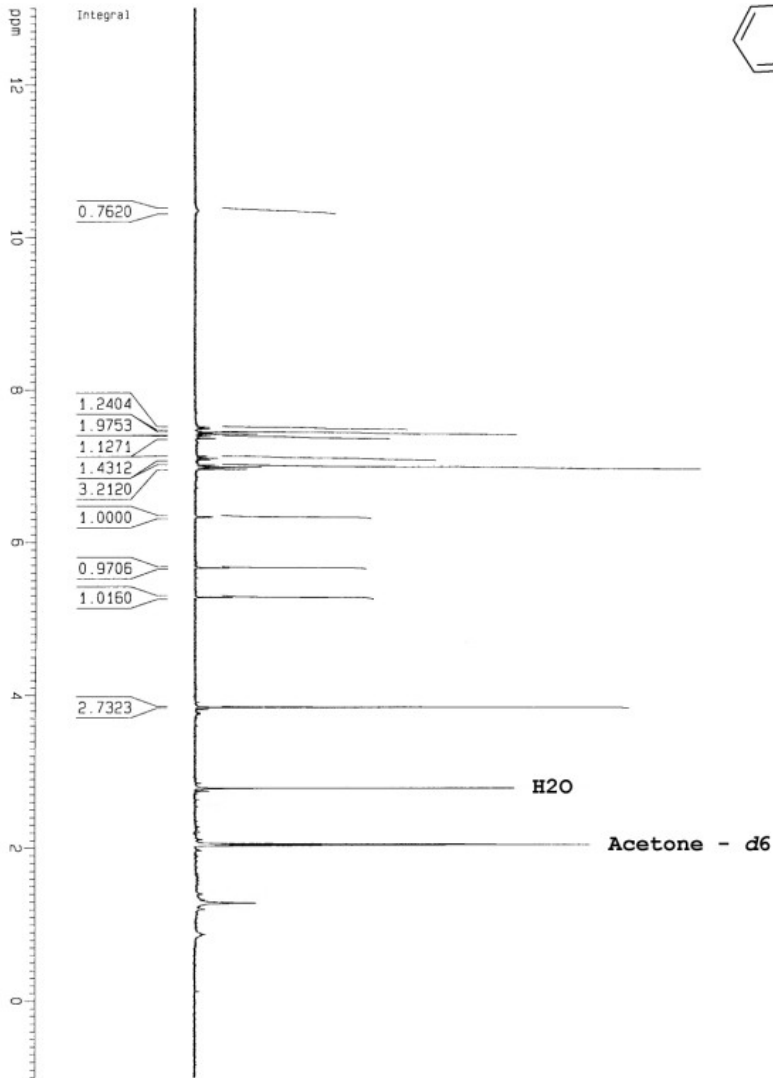

```

Current Data Parameters
NAME      DKH2-172FP
EXPNO    1
PROCNO   1

F2 - Acquisition Parameters
Date_    20051123
Time     16.37
INSTRUM  spect
PROBHD   5 mm NUC1Hn
PULPROG  zg30
TD        65536
SOLVENT  Acetone
NS        16
DS        2
SH1       6172.839 Hz
FIDRES    0.094190 Hz
AQ         5.308660 sec
RG         724.1
DM         81.000 usec
DE         6.00 usec
TE         300.0 K
D1         1.00000000 sec

***** CHANNEL f1 *****
NUC1      1H
P1         9.60 usec
PL1       -6.00 dB
SFO1      300.1318934 MHz

F2 - Processing parameters
SI         32768
SF         300.1300071 MHz
WDW        no
SSB        0
LB         0.00 Hz
GB         0
PC         1.00

1D NMR plot parameters
CX         20.00 cm
F1P        13.000 dpm
F1         3901.69 Hz
F2P        -1.000 dpm
F2         -300.13 Hz
PPOCKM    0.70000 dpm/cm
HZCM       210.09100 Hz/cm
  
```

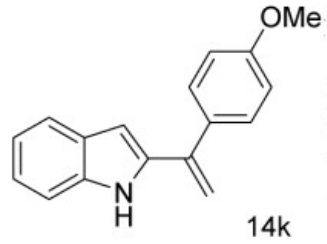

DKH2-299 Product

- 159.710
- 141.049
- 138.100
- 136.347
- 132.435
- 129.622
- 128.626
- 122.555
- 120.723
- 120.035
- 113.700
- 111.712
- 110.718
- 103.142
- 77.423
- 77.000
- 76.575
- 55.325

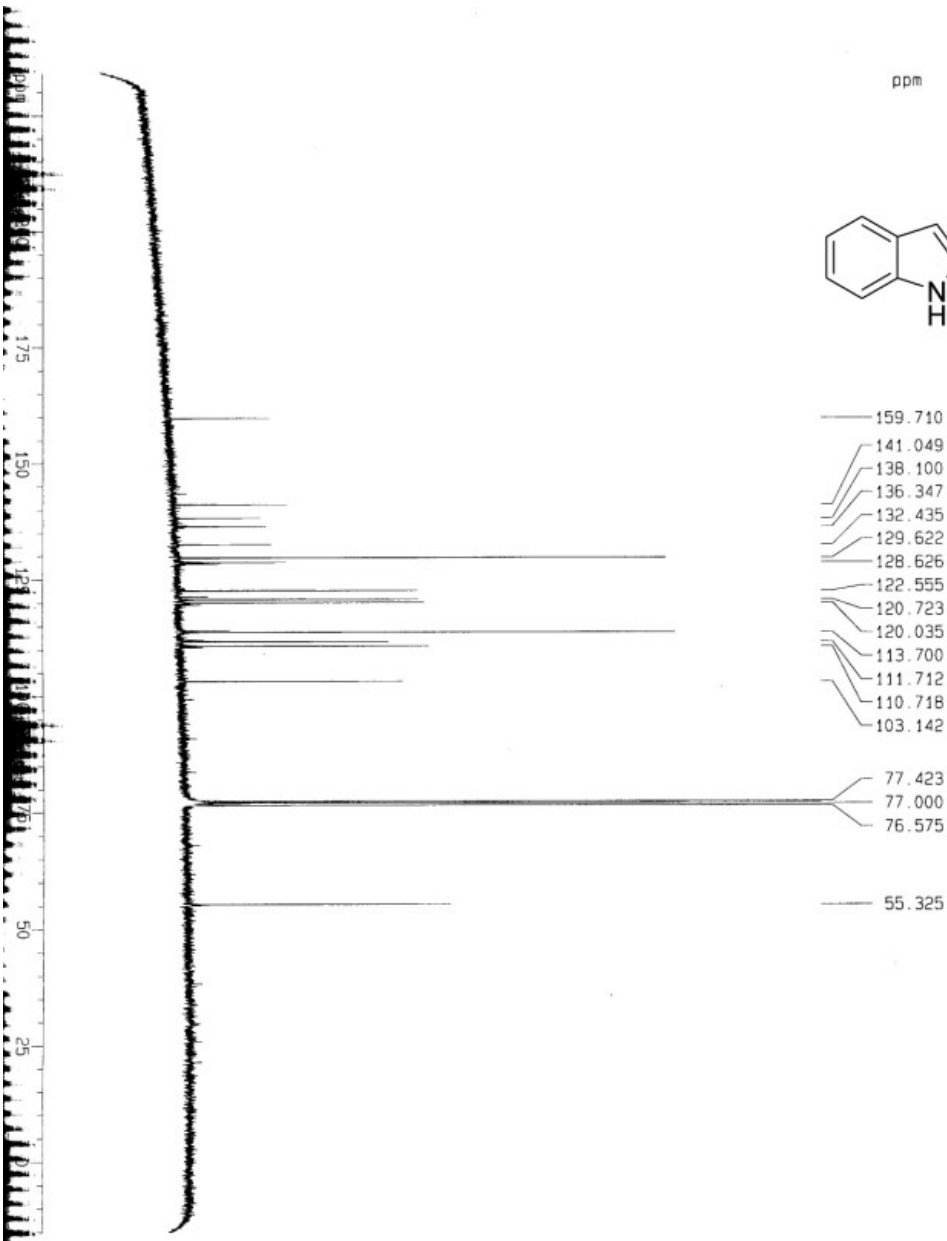

```

Current Data Parameters
NAME      DKH2-299P
EXPNO    686
PROCNO   1

F2 - Acquisition Parameters
Date_    20060413
Time     15.26
INSTRUM spect
PROBHD   5 mm QNP 1H/1
PULPROG zgpg30
TD       65536
SOLVENT  CDCl3
NS       1119
DS       4
SMH      18736.992 Hz
FIDRES   0.286819 Hz
AQ       1.743076 sec
RG       1024
DM       26.600 usec
DE       6.00 usec
TE       300.0 K
O1       2.00000000 sec
D11      0.03000000 sec
D12      0.00002000 sec

***** CHANNEL f1 *****
NUC1     13C
P1       5.40 usec
PL1      -8.00 dB
SFO1     75.4106537 MHz

***** CHANNEL f2 *****
CPDPRG2  waltz16
NUC2     1H
P2       115.00 usec
PL2      0.00 dB
PL12     20.00 dB
PL13     20.00 dB
SFO2     299.8719995 MHz

F2 - Processing parameters
SI       32768
SF       75.4023769 MHz
RG       64
SFO      299.8719995 MHz
PC       1.40

10 NMR plot parameters
CX       20.00 cm
FIP      234.175 ppm
F1       17657.36 Hz
F2P      -15.114 ppm
F3       -1139.83 Hz
F3P      12.48445 ppm/cm
SFO      939.84991 Hz/cm
  
```

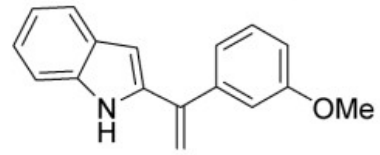

14l

DKH2-129 Product

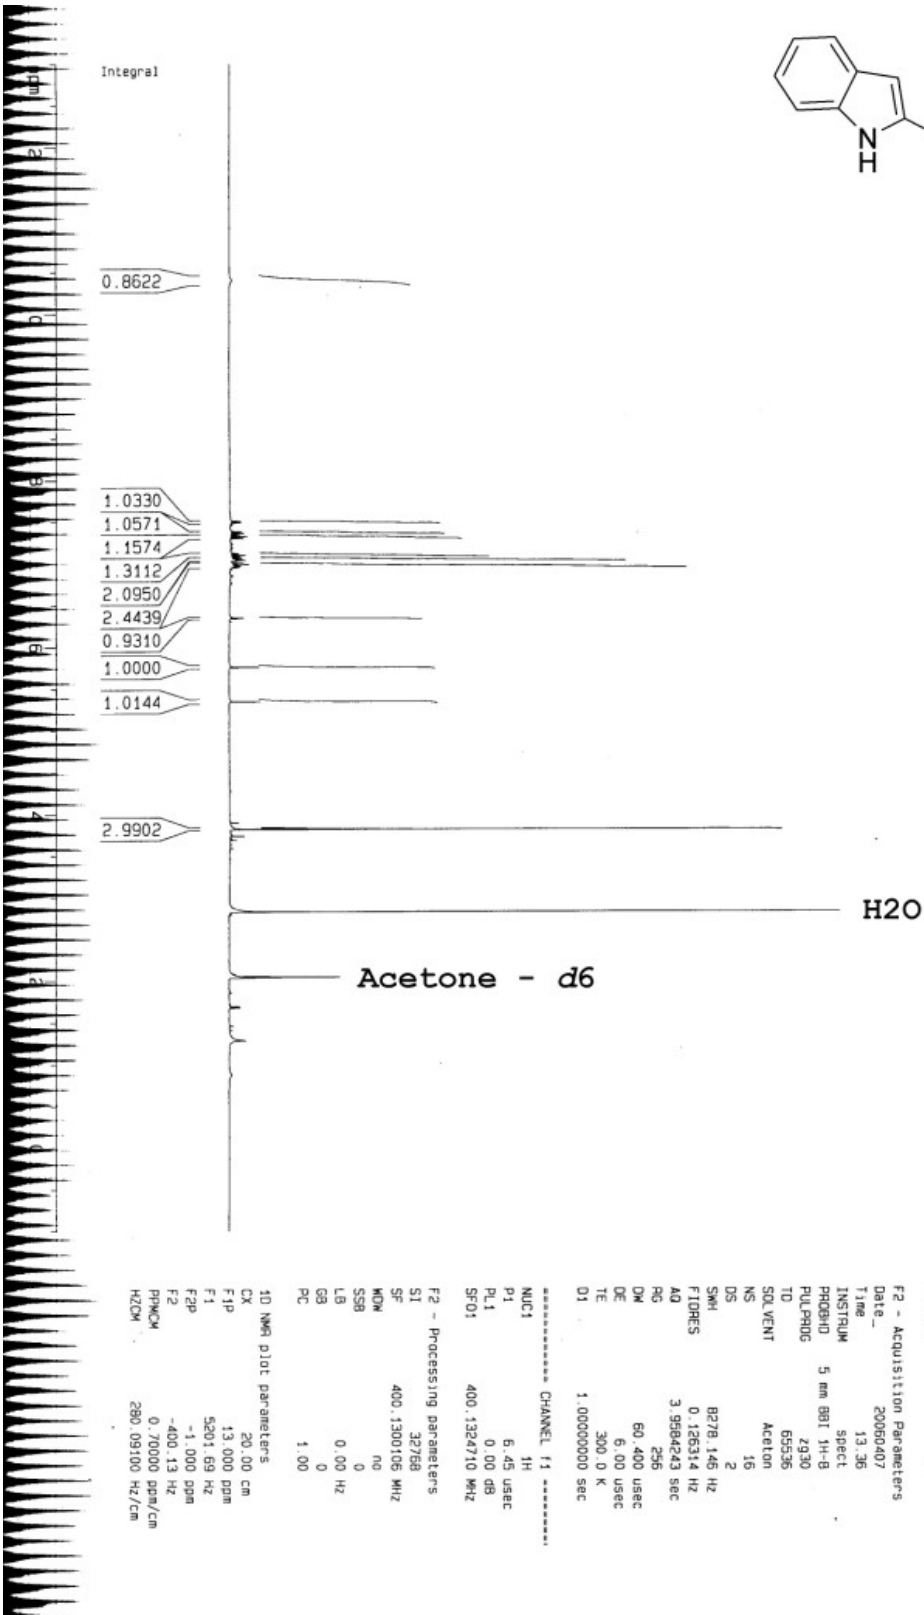

Current Data Parameters  
 NAME DKH2-129P  
 EXPNO 1  
 PROCNO 1

F2 - Acquisition Parameters

Date\_ 20060407  
 Time 13.36  
 INSTRUM spect  
 PROBRID 5 mm BBI 1H-B  
 PULPROG zg30  
 TD 65536  
 SOLVENT Aceton  
 NS 16  
 DS 2  
 SWH 8278.146 Hz  
 FIDRES 0.126314 Hz  
 AQ 3.9586243 sec  
 RG 296  
 DM 60.400 usec  
 DE 6.00 usec  
 TE 300.0 K  
 01 1.000000000 sec

\*\*\*\*\* CHANNEL f1 \*\*\*\*\*

NUC1 1H  
 P1 6.45 usec  
 PL1 0.00 dB  
 SF01 400.1324710 MHz

F2 - Processing parameters

SF 32768  
 SF 400.1300106 MHz  
 MDM no  
 SSB 0  
 LB 0.00 Hz  
 GB 0  
 PC 1.00

10 MHz plot parameters

CX 20.00 cm  
 F1P 13.000 ppm  
 F1 5201.69 Hz  
 F2P -1.000 ppm  
 F2 -400.13 Hz  
 PPM/CM 0.70000 ppm/cm  
 HZ/CM 280.09100 Hz/cm



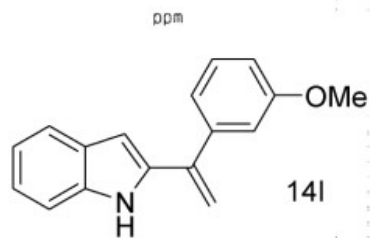

DKH3-18 Product (Yellow 011)

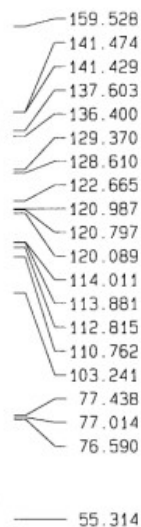

Current Data Parameters  
NAME DKH3-18P  
EXPNO 1  
PROCNO 1

F2 - Acquisition Parameters

Date\_ 20060417  
Time 11:58  
INSTRUM spect  
PROBHD 5 mm QNP 1H/1  
PULPROG zgpg30  
TD 65536  
SOLVENT CDCl3  
NS 296  
DS 4  
SWH 18796.992 Hz  
FIDRES 0.266819 Hz  
AQ 1.743076 sec  
RG 512  
DM 26.600 usec  
DE 6.00 usec  
TE 300.0 K  
D1 2.00000000 sec  
D11 0.03000000 sec  
D12 0.00020000 sec

\*\*\*\*\* CHANNEL f1 \*\*\*\*\*  
NUC1 13C  
P1 5.40 usec  
PL1 -6.00 dB  
SFO1 75.4106357 MHz

\*\*\*\*\* CHANNEL f2 \*\*\*\*\*  
CPDPRG2 maitz16  
NUC2 1H  
PCPRG2 115.00 usec  
PL2 0.00 dB  
PL12 20.00 dB  
PL13 20.00 dB  
SFO2 299.8711995 MHz

F2 - Processing parameters  
S1 32768  
SF 4023753 MHz  
KTM no  
SSB 0  
LB 0.00 Hz  
GB 0  
PC 1.40

10 NMR plot parameters  
CX 20.00 cm  
F1P 234.196 dm  
F1 17658.96 Hz  
F2P -13.093 dm  
F2 -1138.03 Hz

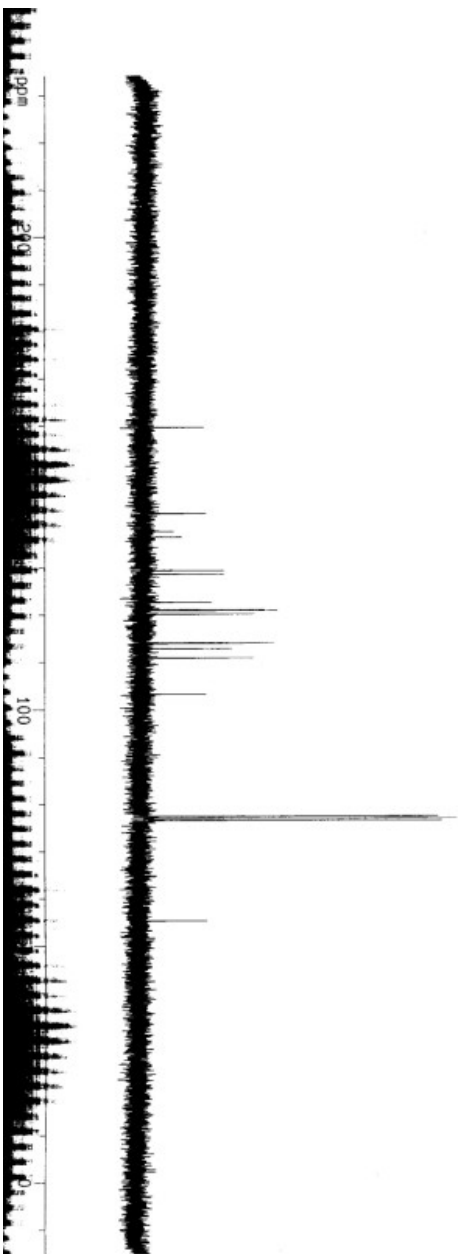

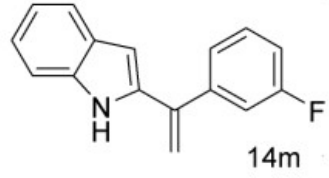

DKH 2-298 Product (Ye1)ow 0.11)

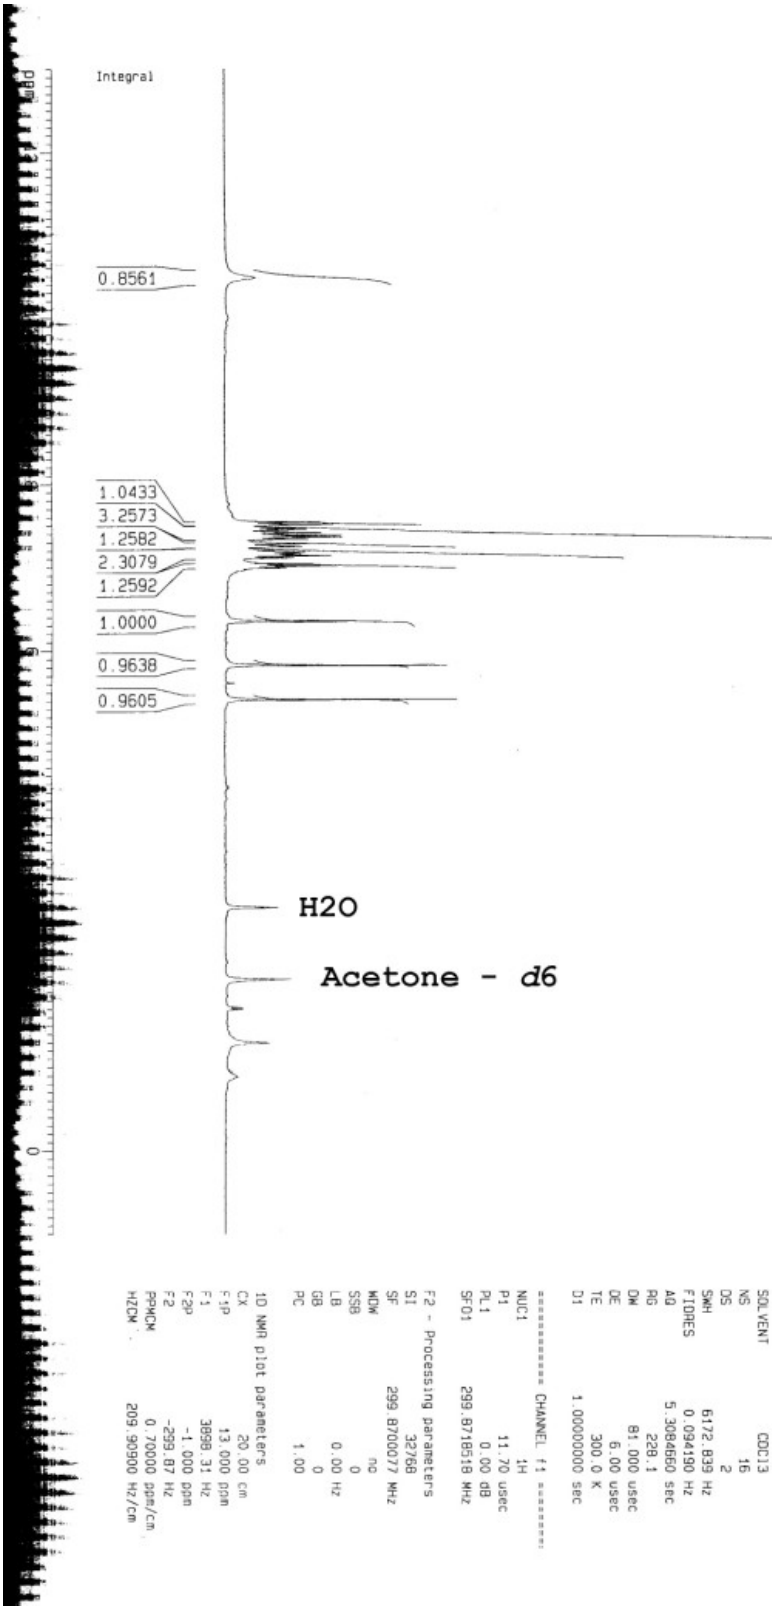

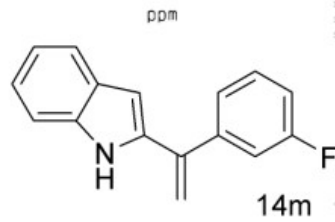

DKH2-298 Product

- 164.321
- 161.058
- 142.285
- 142.184
- 140.617
- 137.056
- 136.492
- 129.860
- 129.751
- 128.543
- 124.192
- 124.154
- 122.899
- 120.870
- 120.210
- 115.600
- 115.307
- 115.259
- 114.978
- 113.213
- 110.784
- 103.679
- 77.425
- 77.001
- 76.577

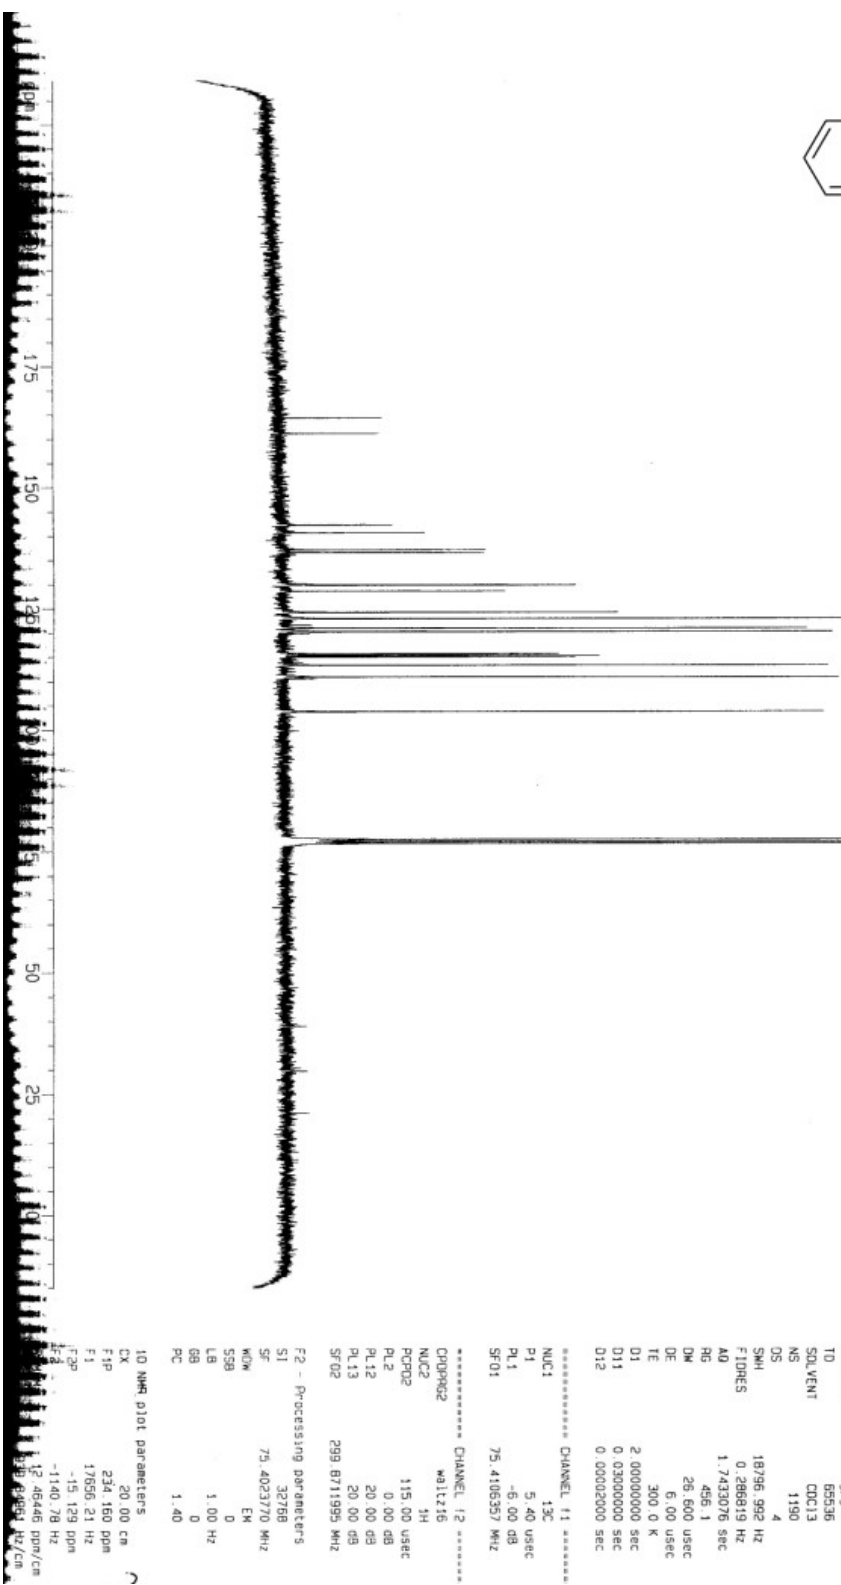

Current Data Parameters  
 NAME DKH2-298P  
 EXEND 666  
 PROCDN 1

F2 - Acquisition Parameters  
 Date 20060411  
 Time 16:58  
 INSTRUM Spect  
 PROBHD 5 mm DNP 1H/1  
 PULPROG zgpg30  
 TD 65536  
 SOLVENT CDCl3  
 NS 1190  
 DS 4  
 SWH 18795.992 Hz  
 FIDRES 0.286819 Hz  
 AQ 1.7433078 sec  
 RG 496.1  
 DE 26.000 usec  
 TE 300.0 K  
 D1 2.00000000 sec  
 D11 0.03000000 sec  
 D12 0.00002000 sec

\*\*\*\*\* CHANNEL f1 \*\*\*\*\*  
 NUC1 13C  
 P1 5.40 usec  
 PL1 -6.00 dB  
 SF01 75.4106337 MHz

\*\*\*\*\* CHANNEL f2 \*\*\*\*\*  
 CPDPRG2 MALTZ16  
 NUC2 1H  
 PCPRG2 115.00 usec  
 PL2 0.00 dB  
 PL12 20.00 dB  
 PL13 20.00 dB  
 SF02 299.8711995 MHz

F2 - Processing parameters  
 S1 32768  
 SF 75.4023770 MHz  
 KW EM  
 SSB 0  
 LB 1.00 Hz  
 GB 0  
 PC 1.40

10 NMR plot parameters  
 CX 20.00 cm  
 F1P 234.160 ppm  
 F1 17856.21 Hz  
 F2P -1140.78 Hz  
 F2 12.6646 ppm/cm  
 F3P 6956.42/cm

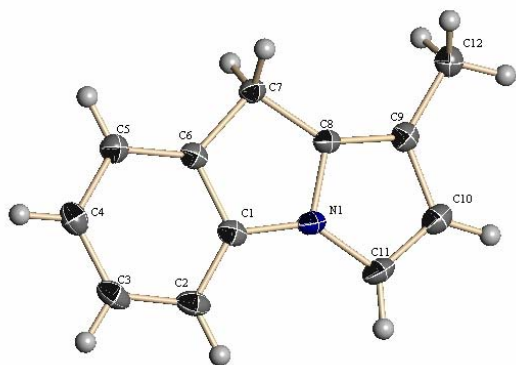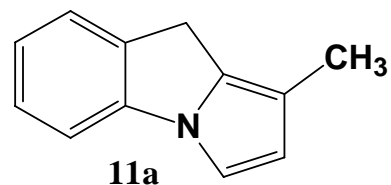

A yellow plate shaped crystal of **11a** (C<sub>12</sub> H<sub>11</sub> N) with approximate dimensions 0.10 x 0.30 x 0.40 mm, was used for the X-ray crystallographic analysis. The X-ray intensity data were measured at 108(2) K, cooled by Rigaku-MSX X-Stream 2000, on a Bruker SMART APEX CCD area detector system equipped with a graphite monochromator and a MoK $\alpha$  fine-focus sealed tube ( $\lambda = 0.71073\text{\AA}$ ) operated at 1600 watts power (50 kV, 32 mA). The detector was placed at a distance of 5.8 cm from the crystal.

A total of 1850 frames were collected with a scan width of  $0.3^\circ$  in  $\omega$  and an exposure time of 20 seconds/frame. The total data collection time was about 12 hours. The frames were integrated with the Bruker SAINT software package using a narrow-frame integration algorithm. The integration of the data using a Monoclinic unit cell yielded a total of 5358 reflections to a maximum  $\theta$  angle of  $28.28^\circ$  ( $0.90\text{\AA}$  resolution), of which 2066 were independent, completeness = 94.9 %,  $R_{\text{int}} = 0.0178$ ,  $R_{\text{sig}} = 0.0245$  and 1729 were greater than  $2\sigma(I)$ . The final cell constants:  $a = 11.907(4)\text{\AA}$ ,  $b = 5.6848(16)\text{\AA}$ ,  $c = 12.950(4)\text{\AA}$ ,  $\alpha = 90^\circ$ ,  $\beta = 92.517(5)^\circ$ ,  $\gamma = 90^\circ$ , volume =  $875.7(4)\text{\AA}^3$ , are based upon the refinement of the XYZ-centroids of 2113 reflections above  $20\sigma(I)$  with  $2.274^\circ < \theta < 28.242^\circ$ . Analysis of the data showed negligible decay during data collection. Data were corrected for absorption effects using the multiscan technique (SADABS). The ratio of minimum to maximum apparent transmission was 0.849448.

The structure was solved and refined using the Bruker SHELXTL (Version 6.1) Software Package, using the space group P2(1)/n, with  $Z = 4$  for the formula unit, C<sub>12</sub> H<sub>11</sub> N. The final anisotropic full-matrix least-squares refinement on  $F^2$  with 119 variables converged at  $R1 = 5.17\%$ , for the observed data and  $wR2 = 13.90\%$  for all data. The

goodness-of-fit was 1.072 . The largest peak on the final difference map was  $0.403 \text{ e}^-/\text{\AA}^3$  and the largest hole was  $-0.249 \text{ e}^-/\text{\AA}^3$  . Based on the final model, the calculated density of the crystal is  $1.283 \text{ g/cm}^3$  and F(000) amounts to 360 electrons.

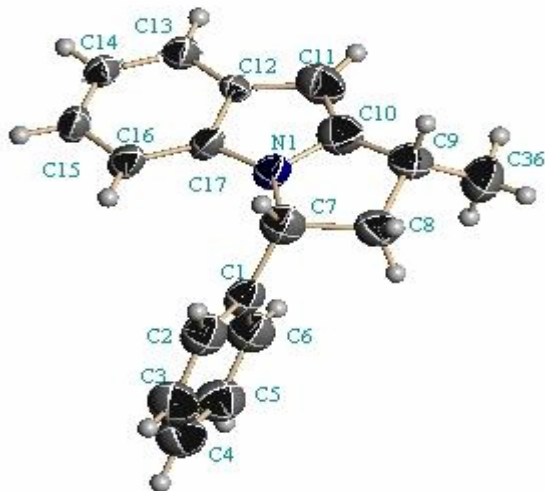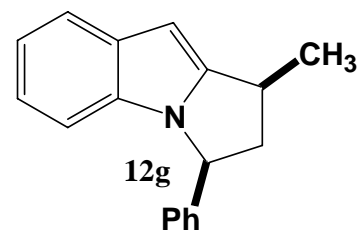

A yellow needle shaped crystal of **12g** (C<sub>18</sub> H<sub>17</sub> N) (two molecules in the asymmetric unit) with approximate dimensions 0.04 x 0.08 x 0.35 mm, was used for the X-ray crystallographic analysis. The X-ray intensity data were measured at 298(2) K, on a Bruker SMART APEX CCD area detector system equipped with a graphite monochromator and a MoK $\alpha$  fine-focus sealed tube ( $\lambda = 0.71073 \text{ \AA}$ ) operated at 1600 watts power (50 kV, 32 mA). The detector was placed at a distance of 5.8 cm from the crystal.

A total of 1850 frames were collected with a scan width of  $0.3^\circ$  in  $\omega$  and an exposure time of 10 seconds/frame. The total data collection time was about 8 hours. The frames were integrated with the Bruker SAINT software package using a narrow-frame integration algorithm. The integration of the data using a Triclinic unit cell yielded a total of 8236 reflections to a maximum  $\theta$  angle of  $28.27^\circ$  ( $0.90 \text{ \AA}$  resolution), of which 6090 were independent, completeness = 89.6 %,  $R_{\text{int}} = 0.0758$ ,  $R_{\text{sig}} = 0.2293$  and 1717 were greater than  $2\sigma(I)$ . The final cell constants:  $a = 5.538(3) \text{ \AA}$ ,  $b = 9.573(5) \text{ \AA}$ ,  $c = 25.815(14) \text{ \AA}$ ,  $\alpha = 90^\circ$ ,  $\beta = 87.270(12)^\circ$ ,  $\gamma = 90^\circ$ , volume =  $1367.1(13) \text{ \AA}^3$ , are based upon the refinement of the XYZ-centroids of 715 reflections above  $20\sigma(I)$  with  $2.269^\circ < \theta < 27.720^\circ$ . Analysis of the data showed negligible decay during data collection. Data were corrected for absorption effects using the multiscan technique (SADABS). The ratio of minimum to maximum apparent transmission was 0.03821.

The structure was solved and refined using the Bruker SHELXTL (Version 6.1) Software

Package, using the space group P-1, with  $Z = 2$  for the formula unit, C<sub>36</sub> H<sub>34</sub> N<sub>2</sub>. The final anisotropic full-matrix least-squares refinement on  $F^2$  with 345 variables converged at  $R1 = 8.23\%$ , for the observed data and  $wR2 = 21.67\%$  for all data. The goodness-of-fit was 0.829. The largest peak on the final difference map was  $0.233 \text{ e}^-/\text{\AA}^3$  and the largest hole was  $-0.247 \text{ e}^-/\text{\AA}^3$ . Based on the final model, the calculated density of the crystal is  $1.202 \text{ g/cm}^3$  and  $F(000)$  amounts to 528 electrons.
